# Supplementary material for: STAT3 induces G9a to exacerbate HER3 expression for the survival of epidermal growth factor receptor-tyrosine kinase inhibitors in lung cancers
Source: BMC Cancer. 2019 Oct 16;19:959. doi: 10.1186/s12885-019-6217-9 (PMC6796430; doi:10.1186/s12885-019-6217-9)
Supplement: Supplementary file 1 — Additional file 1: Table S1. Differential genes in the HCC827-derived tumorspheres analyzed by RNAseq. (XLSX 1505 kb) [file 12885_2019_6217_MOESM1_ESM.xlsx]

## Sheet: 工作表1
Gene	PPEE	PPDE	PostFC	RealFC	C1Mean	C2Mean
CXCL17	0	1	164.914	172.906	2427.8	14.0312
ZASP	4.32987e-14	1	121.322	8358.79	83.5779	0
TMEM256-PLSCR3	5.32907e-14	1	120.214	8281.82	82.8082	0
EPHA7	9.20264e-13	1	105.655	7270.51	72.6951	0
CYP2B7P	0	1	97.4515	132.56	249.312	1.87083
MSMB	0	1	81.7507	140.226	132.562	0.935414
PLEKHG7	4.1092e-09	1	68.7179	4704.8	47.038	0
WBSCR28	2.05187e-08	1	62.5617	4277.18	42.7618	0
ENPP3	0	1	61.8824	76.6827	215.947	2.80624
LRRC31	1.10291e-07	1	56.4056	3849.56	38.4856	0
RPS10-NUDT3	4.71357e-07	1	51.3113	3495.71	34.9471	0
SFTPA1	3.53662e-12	1	49.3455	84.3546	79.7401	0.935414
PROM1	2.55504e-06	0.999997	45.6323	3101.23	31.0023	0
UGT2B15	2.55504e-06	0.999997	45.6323	3101.23	31.0023	0
GLTPD2	4.09554e-06	0.999996	44.0932	2994.33	29.9333	0
CYP4F29P	4.86108e-06	0.999995	43.5392	2955.84	29.5484	0
RNASE1	0	1	43.4923	47.9283	314.299	6.5479
ANKRD35	1.07214e-05	0.999989	41.0151	2780.52	27.7952	0
PRR15L	0	1	40.5911	42.4009	635.013	14.9666
ATP13A4	1.75156e-05	0.999982	39.4761	2673.61	26.7261	0
TSHZ2	2.88074e-05	0.999971	37.937	2566.71	25.6571	0
SLC51A	4.77057e-05	0.999952	36.398	2459.8	24.588	0
CERS4	1.79856e-14	1	35.3156	43.6575	122.94	2.80624
SFTPB	0	1	35.2329	38.0103	320.724	8.42808
BMP3	5.57299e-12	1	34.4284	46.5963	87.6296	1.87083
KCNE3	4.21535e-06	0.999996	33.9232	114.059	32.0713	0.27127
PIGR	0	1	33.5684	33.6397	10515.7	312.587
FSBP	0.000129535	0.99987	33.4122	2252.41	22.5141	0
LGALS2	9.67542e-09	1	33.2183	56.549	53.4522	0.935414
FOXJ1	1.38664e-08	1	32.5625	55.4182	52.3832	0.935414
SLC26A9	0	1	32.4728	34.5648	355.992	10.2896
LOC101927657	1.99416e-08	1	31.9066	54.2875	51.3142	0.935414
C16orf89	0.00022742	0.999773	31.7655	2138.02	21.3702	0
PCSK9	0	1	29.5231	29.9323	1428.24	47.7061
FGL1	0	1	28.8792	31.7897	208.464	6.5479
PTGES3L-AARSD1	0.000768717	0.999231	28.2872	1896.42	18.9542	0
SFTPA2	4.996e-15	1	28.073	32.0274	150.105	4.67707
PLA2G4C	6.55032e-15	1	27.7924	31.7058	148.597	4.67707
ITLN1	5.32309e-10	1	27.7736	37.5191	70.557	1.87083
PPP1R14D	0	1	27.2322	27.7004	1062.63	38.352
AQP5	1.14353e-14	1	27.1953	31.0215	145.39	4.67707
ABCB4	0.00200748	0.997993	25.6247	1711.47	17.1047	0
ADRA2C	0.00200748	0.997993	25.6247	1711.47	17.1047	0
IFITM2	0.00200748	0.997993	25.6247	1711.47	17.1047	0
FAM178B	1.38938e-06	0.999999	24.6923	41.849	39.5547	0.935414
FCGBP	0	1	24.4234	25.2394	496.037	19.6437
AGR3	0.00353519	0.996465	24.0856	1604.57	16.0357	0
OR2A9P	0.00353519	0.996465	24.0856	1604.57	16.0357	0
ATP2A3	3.16942e-06	0.999997	23.3807	39.5875	37.4166	0.935414
CDH26	3.16942e-06	0.999997	23.3807	39.5875	37.4166	0.935414
COLCA1	1.74675e-08	1	23.1898	31.2668	58.7975	1.87083
C4BPA	0	1	23.1841	23.6228	817.819	34.6103
CD177	0.00627431	0.993726	22.5466	1497.66	14.9666	0
PLA2G7	0.00627431	0.993726	22.5466	1497.66	14.9666	0
RAB37	0.00627431	0.993726	22.5466	1497.66	14.9666	0
ATP10B	0	1	22.0929	22.905	407.306	17.7729
HGD	0	1	21.7613	22.0104	1256.13	57.0603
CEACAM5	0	1	21.6805	21.9555	1130.39	51.4759
VIL1	5.55112e-16	1	21.559	23.0621	215.947	9.35414
ERMN	6.75201e-08	1	21.5229	28.9932	54.5213	1.87083
PGLYRP4	6.75201e-08	1	21.5229	28.9932	54.5213	1.87083
ZG16B	0	1	21.25	21.5099	1147.09	53.3186
LINC01207	2.69784e-14	1	21.0235	22.9216	165.531	7.21204
DAPK2	0.011215	0.988785	21.0076	1390.76	13.8976	0
UNC5C	0.011215	0.988785	21.0076	1390.76	13.8976	0
MAP2	1.74143e-05	0.999983	20.7573	35.0644	33.1404	0.935414
GADD45G	1.35166e-07	1	20.6895	27.8564	52.3832	1.87083
BPIFA1	3.94615e-09	1	20.3526	25.0571	70.557	2.80624
ENTPD8	1.92138e-07	1	20.2728	27.2881	51.3142	1.87083
PRH1-PRR4	0.0153842	0.984616	20.1765	1333.03	13.3203	0
PMCH	0	1	19.9789	20.7502	349.578	16.8375
C2CD4A	0	1	19.7523	20.5591	327.128	15.902
HSD17B14	0.0201578	0.979842	19.4685	1283.85	12.8285	0
IYD	0.0201578	0.979842	19.4685	1283.85	12.8285	0
LINC01564	0.0201578	0.979842	19.4685	1283.85	12.8285	0
FAM198B	3.71405e-11	1	19.4337	22.1263	103.697	4.67707
ALPL	5.62639e-07	0.999999	19.0227	25.5829	48.107	1.87083
FBP1	0	1	18.9638	19.2844	739.779	38.352
DEFB4B	0	1	18.9453	19.0298	2764.82	145.279
ACY3	7.46615e-11	1	18.8367	21.442	100.49	4.67707
ACE2	0.000103329	0.999897	18.1339	30.5413	28.8642	0.935414
SHC2	6.21725e-15	1	18.0856	19.1267	214.878	11.225
ABLIM2	0.0363196	0.96368	17.9295	1176.95	11.7595	0
CEACAM7	0.0363196	0.96368	17.9295	1176.95	11.7595	0
GOLGA2P6	0.0363196	0.96368	17.9295	1176.95	11.7595	0
LOC101927318	0.0363196	0.96368	17.9295	1176.95	11.7595	0
LRRC26	0.0363196	0.96368	17.9295	1176.95	11.7595	0
SLC13A2	0.0363196	0.96368	17.9295	1176.95	11.7595	0
B3GNT7	0	1	17.8505	18.2131	579.422	31.8041
TMPRSS2	2.46017e-10	1	17.8416	20.3016	95.145	4.67707
FMO5	3.57492e-14	1	17.5819	18.6841	192.428	10.2896
PALM2-AKAP2	0.0423172	0.957683	17.5293	1149.15	11.4815	0
FREM1	0.000163316	0.999837	17.4781	29.4106	27.7952	0.935414
RHOU	9.75897e-12	1	17.3659	19.0744	125.078	6.5479
APOBEC1	7.05353e-09	1	17.025	19.9494	74.8331	3.74166
SDR16C5	0	1	16.9817	17.4689	392.34	22.4499
LOC100506497	0.000259468	0.999741	16.8222	28.2798	26.7261	0.935414
FAM83E	1.34072e-10	1	16.721	18.6352	104.766	5.61249
CCDC129	5.28566e-06	0.999995	16.5224	22.1725	41.6928	1.87083
ALDOB	0.0652118	0.934788	16.3904	1070.04	10.6904	0
HP	0.0652118	0.934788	16.3904	1070.04	10.6904	0
N4BP3	0.0652118	0.934788	16.3904	1070.04	10.6904	0
PIWIL4	0.0652118	0.934788	16.3904	1070.04	10.6904	0
PLA2G2F	0.0652118	0.934788	16.3904	1070.04	10.6904	0
TEX101	0.0652118	0.934788	16.3904	1070.04	10.6904	0
BGLAP	0.0703152	0.929685	16.1904	1056.15	10.5515	0
SLC2A14	0.000408579	0.999591	16.1861	27.1829	25.6892	0.935414
CEACAM6	0	1	15.575	15.6041	5356.98	343.297
VN1R2	7.39592e-09	1	15.1629	17.2316	80.7557	4.67707
COLCA2	7.1101e-08	1	15.0972	17.6697	66.2808	3.74166
RENBP	1.29674e-13	1	15.0894	15.8254	207.395	13.0958
SERPINF2	3.69926e-13	1	14.94	15.7242	191.359	12.1604
MUC5B	0	1	14.8589	14.8643	26501.6	1782.9
ADGRF5	9.58276e-08	1	14.8562	17.3848	65.2117	3.74166
LEFTY1	0.00107376	0.998926	14.8547	24.8875	23.519	0.935414
IL1RAPL2	0.115448	0.884552	14.8514	963.14	9.6214	0
KRT23	0.115448	0.884552	14.8514	963.14	9.6214	0
LOC101927069	0.115448	0.884552	14.8514	963.14	9.6214	0
LOC105369192	0.115448	0.884552	14.8514	963.14	9.6214	0
PRKCG	0.115448	0.884552	14.8514	963.14	9.6214	0
SIGLEC15	0.115448	0.884552	14.8514	963.14	9.6214	0
SLC7A9	0.115448	0.884552	14.8514	963.14	9.6214	0
SSPO	0.115448	0.884552	14.8514	963.14	9.6214	0
TESC	0.115448	0.884552	14.8514	963.14	9.6214	0
UBXN10-AS1	0.115448	0.884552	14.8514	963.14	9.6214	0
ZBTB7C	0.115448	0.884552	14.8514	963.14	9.6214	0
PRR15	3.0278e-12	1	14.7595	15.6741	161.426	10.2896
LGALS9	5.32119e-10	1	14.5614	15.9771	104.766	6.5479
GDF15	0	1	14.3706	14.3941	5587.9	388.197
GLYCTK	0	1	14.2234	14.3524	1007.04	70.1561
ITLN2	0.00174202	0.998258	14.1988	23.7567	22.4499	0.935414
RNF157-AS1	0.00174202	0.998258	14.1988	23.7567	22.4499	0.935414
NPIPA8	3.45292e-10	1	13.8642	15.0265	113.853	7.5675
GPA33	5.70094e-08	1	13.6623	15.5118	72.6951	4.67707
ALOX15	0.00284053	0.997159	13.543	22.626	21.3809	0.935414
DDIT4L	0.00284053	0.997159	13.543	22.626	21.3809	0.935414
LRRC29	0.00284053	0.997159	13.543	22.626	21.3809	0.935414
ST6GALNAC1	0	1	13.4871	13.6158	904.412	66.4144
TCN2	0	1	13.415	13.5467	874.479	64.5436
C10orf11	0.198015	0.801985	13.3123	856.236	8.55236	0
CAMK2B	0.198015	0.801985	13.3123	856.236	8.55236	0
CCDC160	0.198015	0.801985	13.3123	856.236	8.55236	0
CLDN10	0.198015	0.801985	13.3123	856.236	8.55236	0
LINC01473	0.198015	0.801985	13.3123	856.236	8.55236	0
LOC644285	0.198015	0.801985	13.3123	856.236	8.55236	0
LRRC36	0.198015	0.801985	13.3123	856.236	8.55236	0
LTC4S	0.198015	0.801985	13.3123	856.236	8.55236	0
TNFSF13B	0.198015	0.801985	13.3123	856.236	8.55236	0
CP	0	1	13.2033	13.2369	3293.73	248.82
P2RY8	0.000128597	0.999871	13.1887	17.6254	33.1404	1.87083
OASL	2.30926e-14	1	12.8912	13.2257	321.783	24.3208
NOS3	0.004654	0.995346	12.8872	21.4952	20.3119	0.935414
PIK3CD-AS2	0.004654	0.995346	12.8872	21.4952	20.3119	0.935414
AS3MT	0.232841	0.767159	12.8199	822.027	8.21027	0
MUC5AC	4.55191e-15	1	12.7571	13.0178	401.961	30.8687
C1orf186	5.73578e-05	0.999943	12.6822	16.1289	37.4166	2.31047
UBD	1.11022e-16	1	12.6205	12.7697	680.982	53.3186
CLEC18C	0.251866	0.748134	12.5736	804.922	8.03922	0
DEGS2	2.15131e-06	0.999998	12.4465	14.5353	54.5213	3.74166
DCST2	0.00765812	0.992342	12.2313	20.3644	19.2428	0.935414
PRLR	2.97562e-06	0.999997	12.2055	14.2503	53.4522	3.74166
HLA-DMB	1.93068e-13	1	12.0601	12.3837	289.711	23.3854
CDKN1C	2.83884e-13	1	12.0394	12.3759	277.952	22.4499
RAB26	1.31306e-12	1	11.8608	12.2392	240.535	19.6437
LOC388692	0.316613	0.683387	11.8195	752.539	7.51539	0
CA8	0.320878	0.679122	11.7733	749.331	7.48331	0
CDH5	0.320878	0.679122	11.7733	749.331	7.48331	0
CHRD	0.320878	0.679122	11.7733	749.331	7.48331	0
CPB1	0.320878	0.679122	11.7733	749.331	7.48331	0
CTTNBP2	0.320878	0.679122	11.7733	749.331	7.48331	0
DPEP1	0.320878	0.679122	11.7733	749.331	7.48331	0
DPEP3	0.320878	0.679122	11.7733	749.331	7.48331	0
FAM221B	0.320878	0.679122	11.7733	749.331	7.48331	0
FGF9	0.320878	0.679122	11.7733	749.331	7.48331	0
GUCY2D	0.320878	0.679122	11.7733	749.331	7.48331	0
HIF3A	0.320878	0.679122	11.7733	749.331	7.48331	0
HOPX	0.320878	0.679122	11.7733	749.331	7.48331	0
LINC00261	0.320878	0.679122	11.7733	749.331	7.48331	0
LOC145474	0.320878	0.679122	11.7733	749.331	7.48331	0
LRIT3	0.320878	0.679122	11.7733	749.331	7.48331	0
LY6G5C	0.320878	0.679122	11.7733	749.331	7.48331	0
PSG5	0.320878	0.679122	11.7733	749.331	7.48331	0
SFTPC	0.320878	0.679122	11.7733	749.331	7.48331	0
TMEM150C	0.320878	0.679122	11.7733	749.331	7.48331	0
UMODL1	0.320878	0.679122	11.7733	749.331	7.48331	0
STX19	5.73592e-06	0.999994	11.7235	13.6804	51.3142	3.74166
SLC2A12	2.04359e-11	1	11.7169	12.2068	182.807	14.9666
HAGLR	1.47767e-10	1	11.6967	12.2984	149.666	12.1604
NRXN2	0.012645	0.987355	11.5755	19.2336	18.1738	0.935414
SPRR1A	2.59803e-12	1	11.5513	11.919	234.132	19.6343
SCN2B	0.000696416	0.999304	11.5219	15.3519	28.8642	1.87083
GGT5	6.21162e-05	0.999938	11.497	14.0487	39.5547	2.80624
LOC102723649	1.33971e-12	1	11.3465	11.6619	261.916	22.4499
EBF4	3.8399e-07	1	11.297	12.5508	70.557	5.61249
PARM1	5.05889e-07	0.999999	11.1275	12.3607	69.4879	5.61249
UCP2	1.11022e-16	1	11.0926	11.1317	1968.11	176.793
IL37	3.21525e-11	1	11.0154	11.4224	192.428	16.8375
GLYATL2	0.0209215	0.979078	10.9196	18.1029	17.1047	0.935414
PRR29	0.0209215	0.979078	10.9196	18.1029	17.1047	0.935414
GSTA4	8.21565e-14	1	10.8871	11.0636	424.411	38.352
LOC101927811	8.82875e-07	0.999999	10.7885	11.9804	67.3498	5.61249
SCGB2A1	0.00165907	0.998341	10.6885	14.2151	26.7261	1.87083
ESPN	3.46069e-07	1	10.576	11.5757	75.9022	6.5479
GNA14	3.09536e-05	0.999969	10.5186	12.2556	45.9689	3.74166
SPTSSB	4.77162e-11	1	10.4492	10.7948	202.049	18.7083
SPINK1	2.34257e-13	1	10.3632	10.5225	423.342	40.2228
NPPA-AS1	0.469507	0.530493	10.3112	647.772	6.46772	0
FIBCD1	6.59472e-14	1	10.285	10.4064	545.213	52.3832
ARG2	8.82516e-13	1	10.2847	10.4734	352.785	33.6749
PIFO	0.000285766	0.999714	10.2755	12.5303	35.2785	2.80624
PRSS36	0.0346023	0.965398	10.2638	16.9721	16.0357	0.935414
SLC40A1	0.0346023	0.965398	10.2638	16.9721	16.0357	0.935414
TMEM178A	0.0346023	0.965398	10.2638	16.9721	16.0357	0.935414
HLA-DMA	4.35185e-12	1	10.246	10.4793	284.366	27.127
APOD	0.477818	0.522182	10.2343	642.427	6.41427	0
BLNK	0.477818	0.522182	10.2343	642.427	6.41427	0
C12orf74	0.477818	0.522182	10.2343	642.427	6.41427	0
CCDC102B	0.477818	0.522182	10.2343	642.427	6.41427	0
CD86	0.477818	0.522182	10.2343	642.427	6.41427	0
CFAP206	0.477818	0.522182	10.2343	642.427	6.41427	0
CPED1	0.477818	0.522182	10.2343	642.427	6.41427	0
DIAPH2-AS1	0.477818	0.522182	10.2343	642.427	6.41427	0
FGF17	0.477818	0.522182	10.2343	642.427	6.41427	0
IFNB1	0.477818	0.522182	10.2343	642.427	6.41427	0
KLF3-AS1	0.477818	0.522182	10.2343	642.427	6.41427	0
LOC101929577	0.477818	0.522182	10.2343	642.427	6.41427	0
MAMDC2-AS1	0.477818	0.522182	10.2343	642.427	6.41427	0
MPZ	0.477818	0.522182	10.2343	642.427	6.41427	0
VASH1	0.477818	0.522182	10.2343	642.427	6.41427	0
DEFB4A	5.55112e-16	1	10.1737	10.1757	33169	3259.63
ANKS4B	5.00266e-05	0.99995	10.1719	11.8414	44.5257	3.75101
SLC44A4	7.43422e-05	0.999926	10.1638	11.9285	42.3983	3.54522
BCAS1	1.09723e-05	0.999989	10.1335	11.4703	53.6447	4.66772
LOC100506076	4.26775e-08	1	10.066	10.7295	100.362	9.34479
WFDC21P	1.68487e-12	1	10.0358	10.2195	344.232	33.6749
VSTM2L	7.25242e-12	1	9.9499	10.1682	285.435	28.0624
FAM177B	3.66997e-06	0.999996	9.94105	11.0297	62.0046	5.61249
CLEC7A	8.02651e-08	1	9.75129	10.3911	97.2938	9.35414
COL9A2	6.22835e-14	1	9.71202	9.79073	741.917	75.7686
AGR2	2.22045e-15	1	9.66528	9.67	12157.2	1257.2
BPIFB1	0.056984	0.943016	9.60794	15.8413	14.9666	0.935414
GRID2IP	0.056984	0.943016	9.60794	15.8413	14.9666	0.935414
LINC00862	0.056984	0.943016	9.60794	15.8413	14.9666	0.935414
SLC52A1	0.056984	0.943016	9.60794	15.8413	14.9666	0.935414
CHIA	5.18293e-10	1	9.45741	9.76674	182.807	18.7083
C4BPB	1.55558e-07	1	9.43107	10.0475	94.076	9.35414
LINC00342	8.85958e-14	1	9.36334	9.4259	862.751	91.5209
CYP4F35P	9.25394e-11	1	9.3612	9.59647	233.479	24.3208
SERPINA4	3.83463e-06	0.999996	9.24753	10.1085	66.2808	6.5479
FFAR2	1.05198e-08	1	9.15586	9.55352	134.133	14.0312
CCDC64	9.77033e-11	1	9.05483	9.25804	251.226	27.127
TMEM37	0.00138245	0.998618	9.05404	11.0119	31.0023	2.80624
ETV7	0.00981091	0.990189	9.02165	11.9415	22.4499	1.87083
SPRR3	4.33797e-12	1	9.00117	9.11826	426.549	46.7707
LOC102467080	8.29298e-11	1	8.95237	9.14005	265.123	28.9978
CD40	0.0928619	0.907138	8.9521	14.7106	13.8976	0.935414
FCGR2A	0.0928619	0.907138	8.9521	14.7106	13.8976	0.935414
LGALS4	0.0928619	0.907138	8.9521	14.7106	13.8976	0.935414
VSX1	0.0928619	0.907138	8.9521	14.7106	13.8976	0.935414
SLC15A1	0.621593	0.378407	8.89529	549.42	5.4842	0
PLA2G10	0.000366168	0.999634	8.83179	10.261	38.4856	3.74166
SERPINF1	0.000366168	0.999634	8.83179	10.261	38.4856	3.74166
VNN3	0.000366168	0.999634	8.83179	10.261	38.4856	3.74166
CPXM1	1.56032e-08	1	8.7817	9.13742	136.838	14.9666
TM7SF2	1.12688e-13	1	8.75969	8.78897	1595.02	181.47
SEMA4A	1.0923e-08	1	8.73764	9.07056	144.321	15.902
STAU2-AS1	3.29197e-09	1	8.73375	9.01718	168.439	18.6709
TPTE2P5	0.640555	0.359445	8.71061	536.592	5.35592	0
ADCY5	0.642118	0.357882	8.69522	535.522	5.34522	0
ANKRD20A3	0.642118	0.357882	8.69522	535.522	5.34522	0
C19orf45	0.642118	0.357882	8.69522	535.522	5.34522	0
C9orf135	0.642118	0.357882	8.69522	535.522	5.34522	0
CUBN	0.642118	0.357882	8.69522	535.522	5.34522	0
FSTL5	0.642118	0.357882	8.69522	535.522	5.34522	0
HCST	0.642118	0.357882	8.69522	535.522	5.34522	0
HOXD-AS2	0.642118	0.357882	8.69522	535.522	5.34522	0
IL2RB	0.642118	0.357882	8.69522	535.522	5.34522	0
KLRK1	0.642118	0.357882	8.69522	535.522	5.34522	0
LINC01183	0.642118	0.357882	8.69522	535.522	5.34522	0
LOC101927481	0.642118	0.357882	8.69522	535.522	5.34522	0
LOC440461	0.642118	0.357882	8.69522	535.522	5.34522	0
MEPE	0.642118	0.357882	8.69522	535.522	5.34522	0
MFSD6L	0.642118	0.357882	8.69522	535.522	5.34522	0
MGP	0.642118	0.357882	8.69522	535.522	5.34522	0
MRVI1	0.642118	0.357882	8.69522	535.522	5.34522	0
MYBPC1	0.642118	0.357882	8.69522	535.522	5.34522	0
PIP	0.642118	0.357882	8.69522	535.522	5.34522	0
PLA2G3	0.642118	0.357882	8.69522	535.522	5.34522	0
PPP1R1B	0.642118	0.357882	8.69522	535.522	5.34522	0
PROC	0.642118	0.357882	8.69522	535.522	5.34522	0
PSPN	0.642118	0.357882	8.69522	535.522	5.34522	0
RNF186	0.642118	0.357882	8.69522	535.522	5.34522	0
SCUBE2	0.642118	0.357882	8.69522	535.522	5.34522	0
SLC11A1	0.642118	0.357882	8.69522	535.522	5.34522	0
TARID	0.642118	0.357882	8.69522	535.522	5.34522	0
TMEM178B	0.642118	0.357882	8.69522	535.522	5.34522	0
TMEM221	0.642118	0.357882	8.69522	535.522	5.34522	0
TMPRSS9	0.642118	0.357882	8.69522	535.522	5.34522	0
TNNC2	0.642118	0.357882	8.69522	535.522	5.34522	0
UGT2B10	0.642118	0.357882	8.69522	535.522	5.34522	0
ZFP3	0.642118	0.357882	8.69522	535.522	5.34522	0
ZNF571-AS1	0.642118	0.357882	8.69522	535.522	5.34522	0
CRYM	7.55012e-07	0.999999	8.68637	9.24833	86.5926	9.35414
RNASE4	6.6848e-08	1	8.60712	9.0045	118.001	13.0958
FLVCR2	0.0153888	0.984611	8.60494	11.3731	21.3809	1.87083
ZNF467	1.06619e-08	1	8.57633	8.88421	149.666	16.8375
LOC100506688	0.654525	0.345475	8.57209	526.97	5.2597	0
PIPOX	1.7327e-05	0.999983	8.54206	9.34899	59.8131	6.38888
ACHE	2.8876e-07	1	8.48895	8.9453	100.49	11.225
FXYD2	0.000157584	0.999842	8.48793	9.58165	44.8999	4.67707
VTCN1	0.00309473	0.996905	8.44331	10.2527	28.8642	2.80624
C9orf152	6.36533e-07	0.999999	8.43327	8.92736	91.9379	10.2896
TRIM22	2.05648e-05	0.999979	8.36189	9.13044	59.8665	6.5479
HPN	8.74834e-09	1	8.35547	8.6245	161.426	18.7083
PCDHA1	0.680246	0.319754	8.31045	508.796	5.07796	0
GRAP	0.148349	0.851651	8.29626	13.5798	12.8285	0.935414
PLSCR2	0.148349	0.851651	8.29626	13.5798	12.8285	0.935414
TMEM117	0.148349	0.851651	8.29626	13.5798	12.8285	0.935414
NOXA1	9.37735e-11	1	8.27946	8.40628	330.335	39.2874
IL17C	7.32922e-05	0.999927	8.24606	9.12837	51.3142	5.61249
PCDHA6	0.687631	0.312369	8.2335	503.451	5.02451	0
TLR2	0.00464804	0.995352	8.13794	9.87314	27.7952	2.80624
ACSS2	1.1241e-12	1	8.12944	8.15995	1305.3	159.956
APOH	0.00109775	0.998902	8.10885	9.40611	35.2785	3.74166
PTPRCAP	9.9953e-05	0.9999	8.07657	8.93824	50.2451	5.61249
SLITRK6	9.9953e-05	0.9999	8.07657	8.93824	50.2451	5.61249
TRPM8	9.9953e-05	0.9999	8.07657	8.93824	50.2451	5.61249
NOXO1	1.47342e-05	0.999985	8.05905	8.70399	65.2117	7.48331
SBK1	5.28134e-10	1	8.04802	8.19535	268.384	32.7395
PGPEP1	6.87217e-12	1	8.03332	8.08869	703.432	86.9561
ACSS1	1.9299e-05	0.999981	7.92833	8.56132	64.1427	7.48331
ANKRD34A	0.00013658	0.999863	7.90707	8.7481	49.1761	5.61249
RARRES3	7.70717e-13	1	7.89739	7.90324	6380.06	807.263
C6orf99	0.00159064	0.998409	7.86788	9.12115	34.2094	3.74166
PLA1A	0.00159064	0.998409	7.86788	9.12115	34.2094	3.74166
PIK3R3	1.37501e-12	1	7.83871	7.85425	2365.8	301.203
LPAR6	0.00699565	0.993004	7.83257	9.49354	26.7261	2.80624
PP14571	1.74573e-07	1	7.82605	8.13809	121.871	14.9666
GOLGA6L17P	0.72594	0.27406	7.81796	474.587	4.73587	0
KLF2	0.0378067	0.962193	7.77153	10.2363	19.2428	1.87083
RASSF9	0.0378067	0.962193	7.77153	10.2363	19.2428	1.87083
TMEM176B	0.0378067	0.962193	7.77153	10.2363	19.2428	1.87083
ATP6V1C2	6.5232e-05	0.999935	7.77146	8.47837	55.5903	6.5479
RDH10	1.52878e-12	1	7.71933	7.72259	10896.2	1410.94
LFNG	4.38138e-12	1	7.71516	7.74277	1289.27	166.504
KLHL30	0.0420678	0.957932	7.6408	10.0342	19.0504	1.88954
BCO2	0.229322	0.770678	7.64041	12.449	11.7595	0.935414
CACNA1I	0.229322	0.770678	7.64041	12.449	11.7595	0.935414
HLA-DPB1	0.229322	0.770678	7.64041	12.449	11.7595	0.935414
SPTBN5	0.229322	0.770678	7.64041	12.449	11.7595	0.935414
TLR5	0.229322	0.770678	7.64041	12.449	11.7595	0.935414
TCN1	3.28781e-12	1	7.63734	7.6552	1947.8	254.433
NCMAP	2.17599e-09	1	7.57969	7.71688	253.364	32.8237
SELENBP1	3.66007e-12	1	7.57694	7.59267	2173.37	286.237
WIPI1	9.24637e-09	1	7.54082	7.71172	202.049	26.1916
DHRS9	4.37728e-05	0.999956	7.53616	8.13332	60.9356	7.48331
LOC100506123	9.25605e-11	1	7.53228	7.59947	505.776	66.5454
MUC20	1.00527e-10	1	7.48007	7.54503	515.28	68.2852
PECAM1	0.0029255	0.997075	7.47508	8.65668	32.4669	3.74166
FADS2	7.2683e-12	1	7.42147	7.43894	1871.9	251.626
IL36RN	5.7691e-05	0.999942	7.40543	7.99066	59.8665	7.48331
CAPN8	4.98054e-11	1	7.3979	7.44519	689.534	92.606
HES6	4.87505e-08	1	7.39598	7.59942	163.564	21.5145
LAMP3	2.73156e-10	1	7.3707	7.44589	431.894	57.9957
SLC6A20	0.000146597	0.999853	7.36554	8.03008	52.6505	6.5479
CCL22	0.0583887	0.941611	7.36315	9.67932	18.1951	1.87083
BMP5	0.0589043	0.941096	7.35482	9.66795	18.1738	1.87083
KDR	0.0589043	0.941096	7.35482	9.66795	18.1738	1.87083
MST1P2	0.0591637	0.940836	7.35065	9.66227	18.1631	1.87083
SIPA1L2	6.4624e-10	1	7.33806	7.42725	361.337	48.6415
FAM231C	0.767578	0.232422	7.32547	440.377	4.39377	0
TRPM6	0.771259	0.228741	7.2793	437.17	4.3617	0
C1orf228	7.61524e-05	0.999924	7.27471	7.84799	58.7975	7.48331
TMOD1	7.61524e-05	0.999924	7.27471	7.84799	58.7975	7.48331
LINC00514	0.773691	0.226309	7.24852	435.032	4.34032	0
MIA-RAB4B	0.773691	0.226309	7.24852	435.032	4.34032	0
C10orf10	2.28677e-09	1	7.228	7.33397	295.056	40.2228
HCG26	0.0159093	0.984091	7.22184	8.73434	24.588	2.80624
TPTE2P1	0.777307	0.222693	7.20234	431.825	4.30825	0
MLXIPL	0.000212732	0.999787	7.18104	7.82631	51.3142	6.5479
AKR1C4	0.779695	0.220305	7.17156	429.687	4.28687	0
NUGGC	0.779695	0.220305	7.17156	429.687	4.28687	0
TMEM56-RWDD3	0.779695	0.220305	7.17156	429.687	4.28687	0
FTX	0.305929	0.694071	7.16165	11.6236	10.9791	0.935414
ADAM20	0.780883	0.219117	7.15617	428.618	4.27618	0
AMIGO1	0.780883	0.219117	7.15617	428.618	4.27618	0
ATRNL1	0.780883	0.219117	7.15617	428.618	4.27618	0
CD72	0.780883	0.219117	7.15617	428.618	4.27618	0
CFAP74	0.780883	0.219117	7.15617	428.618	4.27618	0
DIO1	0.780883	0.219117	7.15617	428.618	4.27618	0
EMILIN1	0.780883	0.219117	7.15617	428.618	4.27618	0
ENO1-AS1	0.780883	0.219117	7.15617	428.618	4.27618	0
ERN2	0.780883	0.219117	7.15617	428.618	4.27618	0
FAM50B	0.780883	0.219117	7.15617	428.618	4.27618	0
FEZF1-AS1	0.780883	0.219117	7.15617	428.618	4.27618	0
FLJ35934	0.780883	0.219117	7.15617	428.618	4.27618	0
IPCEF1	0.780883	0.219117	7.15617	428.618	4.27618	0
KCNH2	0.780883	0.219117	7.15617	428.618	4.27618	0
KCNQ1	0.780883	0.219117	7.15617	428.618	4.27618	0
LINC00615	0.780883	0.219117	7.15617	428.618	4.27618	0
LINC01598	0.780883	0.219117	7.15617	428.618	4.27618	0
LIPK	0.780883	0.219117	7.15617	428.618	4.27618	0
LOC100129973	0.780883	0.219117	7.15617	428.618	4.27618	0
LOC100134368	0.780883	0.219117	7.15617	428.618	4.27618	0
LOC101927087	0.780883	0.219117	7.15617	428.618	4.27618	0
LOC101927166	0.780883	0.219117	7.15617	428.618	4.27618	0
LOC221946	0.780883	0.219117	7.15617	428.618	4.27618	0
MMP12	0.780883	0.219117	7.15617	428.618	4.27618	0
NXPH3	0.780883	0.219117	7.15617	428.618	4.27618	0
OPRL1	0.780883	0.219117	7.15617	428.618	4.27618	0
PRCAT47	0.780883	0.219117	7.15617	428.618	4.27618	0
PTTG3P	0.780883	0.219117	7.15617	428.618	4.27618	0
RNU6-2	0.780883	0.219117	7.15617	428.618	4.27618	0
SCGB3A1	0.780883	0.219117	7.15617	428.618	4.27618	0
SERHL2	0.780883	0.219117	7.15617	428.618	4.27618	0
SLC25A18	0.780883	0.219117	7.15617	428.618	4.27618	0
SLC5A1	0.780883	0.219117	7.15617	428.618	4.27618	0
SLC6A12	0.780883	0.219117	7.15617	428.618	4.27618	0
SMIM10L2B	0.780883	0.219117	7.15617	428.618	4.27618	0
SORBS2	0.780883	0.219117	7.15617	428.618	4.27618	0
TEKT3	0.780883	0.219117	7.15617	428.618	4.27618	0
TMED6	0.780883	0.219117	7.15617	428.618	4.27618	0
TMEM59L	0.780883	0.219117	7.15617	428.618	4.27618	0
TNFRSF13C	0.780883	0.219117	7.15617	428.618	4.27618	0
UBQLNL	0.780883	0.219117	7.15617	428.618	4.27618	0
USHBP1	0.780883	0.219117	7.15617	428.618	4.27618	0
TRIM2	3.81253e-11	1	7.12656	7.15233	1164.19	162.762
IGBP1P1	0.783246	0.216754	7.12539	426.48	4.2548	0
RASA4B	3.43059e-08	1	7.09922	7.25763	191.306	26.3506
RSAD2	0.0017151	0.998285	7.09483	7.98507	37.4166	4.67707
LINC00417	0.78559	0.21441	7.09461	424.342	4.23342	0
LOC102723968	0.78559	0.21441	7.09461	424.342	4.23342	0
OLMALINC	2.60638e-09	1	7.0905	7.18738	309.328	43.0291
LOC643387	0.00958299	0.990417	7.07712	8.32976	27.6562	3.31137
LY96	2.21229e-11	1	7.0729	7.0862	2213.99	312.428
FREM2	1.53646e-05	0.999985	7.0707	7.47423	76.9712	10.2896
ITGB2-AS1	1.05592e-09	1	7.05548	7.13187	386.994	54.254
GPNMB	6.3606e-07	0.999999	7.05192	7.29785	122.94	16.8375
FUT3	2.10732e-09	1	7.04094	7.12942	333.243	46.7333
TP53INP1	3.14071e-09	1	7.00542	7.09892	312.161	43.9645
CLDN2	0.337704	0.662296	6.98457	11.3183	10.6904	0.935414
GS1-594A7.3	0.337704	0.662296	6.98457	11.3183	10.6904	0.935414
LIFR-AS1	0.337704	0.662296	6.98457	11.3183	10.6904	0.935414
PACERR	0.337704	0.662296	6.98457	11.3183	10.6904	0.935414
LOC101928100	7.40917e-09	1	6.9446	7.05069	270.468	38.352
ANKK1	0.0908854	0.909115	6.93811	9.09956	17.1047	1.87083
CYP2B6	0.0908854	0.909115	6.93811	9.09956	17.1047	1.87083
TNRC6C-AS1	1.40435e-05	0.999986	6.91944	7.28595	80.5525	11.0472
TTLL1	0.000925506	0.999074	6.89008	7.60728	42.7618	5.61249
SLC2A6	2.23112e-09	1	6.882	6.95886	364.587	52.3832
CES3	4.42563e-09	1	6.87314	6.96243	313.519	45.0215
SPINK5	2.57663e-09	1	6.84092	6.91724	362.406	52.3832
WFDC2	9.34178e-11	1	6.80568	6.82526	1385.48	202.985
IFITM1	1.96856e-10	1	6.78231	6.81189	911.564	133.811
NCF4	0.000112865	0.999887	6.76263	7.23069	60.9356	8.41873
SLC46A3	0.000112865	0.999887	6.76263	7.23069	60.9356	8.41873
OAS2	1.53291e-09	1	6.76201	6.82311	440.447	64.5436
IL12RB1	0.810217	0.189783	6.75602	400.823	3.99823	0
LOC100129046	0.000525491	0.999475	6.73822	7.33726	48.107	6.5479
C11orf72	6.1351e-11	1	6.73711	6.74305	4455.9	660.805
RND2	0.000119829	0.99988	6.73343	7.19861	60.7324	8.42808
TMPRSS4	1.16373e-10	1	6.70762	6.72433	1572.57	233.854
PRODH	9.14844e-11	1	6.6988	6.70015	19347.6	2887.62
GTF2IRD2B	3.51776e-06	0.999996	6.66888	6.92341	105.558	15.2379
BCL2L14	0.0104658	0.989534	6.66299	7.69639	28.8642	3.74166
LCN2	3.11277e-10	1	6.63458	6.63472	186838	28160.6
RPLP0P2	0.00152881	0.998471	6.62431	7.30801	41.1475	5.62184
B3GALT4	1.62714e-05	0.999984	6.62382	6.94017	84.4546	12.1604
LOC100130093	0.0361129	0.963887	6.61111	7.97514	22.4499	2.80624
TJP3	4.01373e-10	1	6.60699	6.6363	869.134	130.958
IL19	5.05789e-05	0.999949	6.58408	6.95525	71.626	10.2896
ASB2	6.52641e-09	1	6.57908	6.65198	348.509	52.3832
TMEM61	0.00177675	0.998223	6.55108	7.227	40.6237	5.61249
PDCL3P4	2.88362e-09	1	6.53725	6.59283	449.694	68.2011
ZNF703	0.000193208	0.999807	6.52802	6.97703	58.7975	8.41873
CAPN13	0.137952	0.862048	6.5214	8.53117	16.0357	1.87083
URAHP	0.137952	0.862048	6.5214	8.53117	16.0357	1.87083
C5	0.00491232	0.995088	6.49778	7.30081	34.2094	4.67707
LOC113230	0.00491232	0.995088	6.49778	7.30081	34.2094	4.67707
PTCH1	0.00491232	0.995088	6.49778	7.30081	34.2094	4.67707
SMIM1	0.00491232	0.995088	6.49778	7.30081	34.2094	4.67707
FGG	9.43202e-10	1	6.49372	6.52868	702.363	107.573
MUC3A	0.000415915	0.999584	6.49037	6.99199	52.3832	7.48331
RORC	4.44257e-05	0.999956	6.42613	6.75678	75.9022	11.225
DYNC1I1	0.0153075	0.984693	6.42201	7.41144	27.7952	3.74166
PRR36	3.11514e-08	1	6.37289	6.45836	277.952	43.0291
PIWIL2	0.836572	0.163428	6.35587	373.028	3.72028	0
AATBC	0.466831	0.533169	6.32873	10.1875	9.6214	0.935414
AWAT2	0.466831	0.533169	6.32873	10.1875	9.6214	0.935414
CST1	0.466831	0.533169	6.32873	10.1875	9.6214	0.935414
GRAMD2	0.466831	0.533169	6.32873	10.1875	9.6214	0.935414
LIPE	0.466831	0.533169	6.32873	10.1875	9.6214	0.935414
LOC101929626	0.466831	0.533169	6.32873	10.1875	9.6214	0.935414
RGAG4	0.466831	0.533169	6.32873	10.1875	9.6214	0.935414
CDX2	0.0541178	0.945882	6.30574	7.59554	21.3809	2.80624
KLHL3	0.0541178	0.945882	6.30574	7.59554	21.3809	2.80624
PLA2R1	0.00699559	0.993004	6.29877	7.07273	33.1404	4.67707
TPRG1	0.00699559	0.993004	6.29877	7.07273	33.1404	4.67707
NACA2	0.46701	0.53299	6.28933	10.0453	9.67486	0.954123
ANKRD60	0.841303	0.158697	6.27892	367.682	3.66682	0
SMARCD3	3.36418e-06	0.999997	6.26178	6.45423	120.802	18.7083
VPS37D	0.000741086	0.999259	6.22893	6.70666	50.2451	7.48331
SLCO1A2	0.718529	0.281471	6.21688	15.2928	6.00803	0.38352
UCN	0.00343201	0.996568	6.21208	6.84673	38.4856	5.61249
LUM	0.0223792	0.977621	6.18103	7.12648	26.7261	3.74166
KLRC3	0.0647748	0.935225	6.16833	7.42472	20.8998	2.80624
NEURL3	1.22321e-08	1	6.14146	6.1923	428.687	69.2207
MFSD4	3.49842e-09	1	6.12693	6.15769	702.598	114.092
S100A14	8.16119e-10	1	6.1253	6.1333	2690.79	438.709
ANG	2.72395e-05	0.999973	6.1177	6.36722	89.3935	14.0312
ABHD11-AS1	0.204191	0.795809	6.10469	7.96278	14.9666	1.87083
MARCH1	0.204191	0.795809	6.10469	7.96278	14.9666	1.87083
SLC15A3	0.204191	0.795809	6.10469	7.96278	14.9666	1.87083
ULBP1	0.204191	0.795809	6.10469	7.96278	14.9666	1.87083
IZUMO4	0.000991274	0.999009	6.0982	6.56399	49.1761	7.48331
PALM3	4.71988e-09	1	6.06979	6.10123	673.498	110.379
LOC101927178	0.0897171	0.910283	6.06295	7.37199	19.5101	2.63787
CKMT1B	0.0576443	0.942356	6.05032	7.18043	21.9582	3.04945
TMEM140	2.98792e-06	0.999997	6.04819	6.20876	133.631	21.5145
ZNF491	0.0801605	0.91984	6.00343	7.21974	20.3225	2.80624
OR2A4	0.157142	0.842858	6.00138	7.55196	16.6664	2.19822
LOC100129518	0.080475	0.919525	6.00038	7.21594	20.3119	2.80624
CACFD1	4.07886e-09	1	5.99809	6.0228	833.855	138.441
PCYT2	2.82154e-09	1	5.9926	6.01163	1079.74	179.6
ABAT	0.000142857	0.999857	5.97769	6.28101	70.557	11.225
FCGRT	1.23757e-08	1	5.94981	5.98754	537.73	89.7998
BCL6	2.31377e-07	1	5.9265	6.01233	236.259	39.2874
PRUNE2	0.0142158	0.985784	5.90074	6.61656	31.0023	4.67707
DEFB1	4.58835e-09	1	5.88435	5.90346	1032.7	174.922
PLEKHG1	1.10306e-05	0.999989	5.8761	6.05444	113.319	18.7083
CATSPERB	0.000120188	0.99988	5.87536	6.14961	74.8331	12.1604
SRD5A3	2.88701e-09	1	5.85873	5.8689	1920.02	327.142
CCL20	2.73761e-09	1	5.83909	5.84641	2646.96	452.741
CAPS	1.03761e-06	0.999999	5.81376	5.92048	182.807	30.8687
MFSD7	1.28168e-07	1	5.795	5.8588	301.471	51.4478
HLA-DRA	3.77585e-07	1	5.79281	5.87631	230.914	39.2874
LIMD2	2.1167e-07	1	5.75791	5.82754	272.606	46.7707
CD74	4.59987e-07	1	5.73934	5.8219	228.776	39.2874
GIPR	0.00881038	0.99119	5.73071	6.30674	35.4495	5.61249
NEBL	8.88135e-06	0.999991	5.71125	5.86109	126.147	21.5145
CDRT1	0.203325	0.796675	5.7095	7.14526	16.0357	2.23564
ITPKA	0.00239024	0.99761	5.70603	6.13599	45.9689	7.48331
NRTN	0.00929255	0.990707	5.70359	6.27631	35.2785	5.61249
SLC16A9	0.00929255	0.990707	5.70359	6.27631	35.2785	5.61249
LOC284578	0.0475076	0.952492	5.69907	6.55658	24.588	3.74166
NDUFA4L2	0.0475076	0.952492	5.69907	6.55658	24.588	3.74166
IRAK3	0.873822	0.126178	5.69408	327.059	3.26059	0
GTSE1-AS1	0.291664	0.708336	5.68798	7.39439	13.8976	1.87083
ITGA10	0.291664	0.708336	5.68798	7.39439	13.8976	1.87083
LINC01590	0.291664	0.708336	5.68798	7.39439	13.8976	1.87083
CXXC4	0.600691	0.399309	5.67288	9.05673	8.55236	0.935414
FCAMR	0.600691	0.399309	5.67288	9.05673	8.55236	0.935414
GBGT1	0.600691	0.399309	5.67288	9.05673	8.55236	0.935414
GPT	0.600691	0.399309	5.67288	9.05673	8.55236	0.935414
KCNIP3	0.600691	0.399309	5.67288	9.05673	8.55236	0.935414
LINC01251	0.600691	0.399309	5.67288	9.05673	8.55236	0.935414
LOC101928710	0.600691	0.399309	5.67288	9.05673	8.55236	0.935414
S1PR5	0.600691	0.399309	5.67288	9.05673	8.55236	0.935414
STMND1	0.600691	0.399309	5.67288	9.05673	8.55236	0.935414
ZNF396	0.600691	0.399309	5.67288	9.05673	8.55236	0.935414
RASD1	3.75455e-06	0.999996	5.67201	5.79409	151.804	26.1916
OR7E156P	0.875371	0.124629	5.6633	324.921	3.23921	0
ERVK13-1	3.34794e-08	1	5.65277	5.68519	558.597	98.2466
LGALS7B	0.000336913	0.999663	5.64611	5.92805	66.8688	11.2717
LINC00907	0.876904	0.123096	5.63252	322.783	3.21783	0
SESN3	0.000157859	0.999842	5.63187	5.87383	76.9712	13.0958
A3GALT2	0.877664	0.122336	5.61713	321.713	3.20713	0
ACKR4	0.877664	0.122336	5.61713	321.713	3.20713	0
ANKRD30BL	0.877664	0.122336	5.61713	321.713	3.20713	0
AQP9	0.877664	0.122336	5.61713	321.713	3.20713	0
ARHGAP26-AS1	0.877664	0.122336	5.61713	321.713	3.20713	0
ARHGEF15	0.877664	0.122336	5.61713	321.713	3.20713	0
ARR3	0.877664	0.122336	5.61713	321.713	3.20713	0
AVPR1A	0.877664	0.122336	5.61713	321.713	3.20713	0
BAALC	0.877664	0.122336	5.61713	321.713	3.20713	0
BAALC-AS2	0.877664	0.122336	5.61713	321.713	3.20713	0
BEST4	0.877664	0.122336	5.61713	321.713	3.20713	0
C11orf97	0.877664	0.122336	5.61713	321.713	3.20713	0
C8orf89	0.877664	0.122336	5.61713	321.713	3.20713	0
CD36	0.877664	0.122336	5.61713	321.713	3.20713	0
CDIPT-AS1	0.877664	0.122336	5.61713	321.713	3.20713	0
CECR1	0.877664	0.122336	5.61713	321.713	3.20713	0
CHIT1	0.877664	0.122336	5.61713	321.713	3.20713	0
CLEC3B	0.877664	0.122336	5.61713	321.713	3.20713	0
CLIC6	0.877664	0.122336	5.61713	321.713	3.20713	0
COL2A1	0.877664	0.122336	5.61713	321.713	3.20713	0
DCHS2	0.877664	0.122336	5.61713	321.713	3.20713	0
FAM124A	0.877664	0.122336	5.61713	321.713	3.20713	0
FCRL2	0.877664	0.122336	5.61713	321.713	3.20713	0
FLJ16171	0.877664	0.122336	5.61713	321.713	3.20713	0
FOXD3	0.877664	0.122336	5.61713	321.713	3.20713	0
GC	0.877664	0.122336	5.61713	321.713	3.20713	0
GRIN3B	0.877664	0.122336	5.61713	321.713	3.20713	0
HAPLN2	0.877664	0.122336	5.61713	321.713	3.20713	0
HIST1H3E	0.877664	0.122336	5.61713	321.713	3.20713	0
HOXD4	0.877664	0.122336	5.61713	321.713	3.20713	0
HSD17B2	0.877664	0.122336	5.61713	321.713	3.20713	0
INSM2	0.877664	0.122336	5.61713	321.713	3.20713	0
JPH3	0.877664	0.122336	5.61713	321.713	3.20713	0
JSRP1	0.877664	0.122336	5.61713	321.713	3.20713	0
KIAA1210	0.877664	0.122336	5.61713	321.713	3.20713	0
KIAA1257	0.877664	0.122336	5.61713	321.713	3.20713	0
KLK1	0.877664	0.122336	5.61713	321.713	3.20713	0
LINC00173	0.877664	0.122336	5.61713	321.713	3.20713	0
LINC01134	0.877664	0.122336	5.61713	321.713	3.20713	0
LOC100128076	0.877664	0.122336	5.61713	321.713	3.20713	0
LOC101927472	0.877664	0.122336	5.61713	321.713	3.20713	0
LOC101929395	0.877664	0.122336	5.61713	321.713	3.20713	0
LOC283710	0.877664	0.122336	5.61713	321.713	3.20713	0
LOC285629	0.877664	0.122336	5.61713	321.713	3.20713	0
LOC643441	0.877664	0.122336	5.61713	321.713	3.20713	0
LOC647323	0.877664	0.122336	5.61713	321.713	3.20713	0
LRRC4B	0.877664	0.122336	5.61713	321.713	3.20713	0
MAGEA10	0.877664	0.122336	5.61713	321.713	3.20713	0
MAGEC1	0.877664	0.122336	5.61713	321.713	3.20713	0
MEDAG	0.877664	0.122336	5.61713	321.713	3.20713	0
MEOX1	0.877664	0.122336	5.61713	321.713	3.20713	0
MLIP	0.877664	0.122336	5.61713	321.713	3.20713	0
MSMP	0.877664	0.122336	5.61713	321.713	3.20713	0
MUC2	0.877664	0.122336	5.61713	321.713	3.20713	0
MUC21	0.877664	0.122336	5.61713	321.713	3.20713	0
MUC6	0.877664	0.122336	5.61713	321.713	3.20713	0
OR13A1	0.877664	0.122336	5.61713	321.713	3.20713	0
PLBD1-AS1	0.877664	0.122336	5.61713	321.713	3.20713	0
PRAM1	0.877664	0.122336	5.61713	321.713	3.20713	0
RDH16	0.877664	0.122336	5.61713	321.713	3.20713	0
RNASE6	0.877664	0.122336	5.61713	321.713	3.20713	0
SELP	0.877664	0.122336	5.61713	321.713	3.20713	0
SERPINB11	0.877664	0.122336	5.61713	321.713	3.20713	0
SH2D1B	0.877664	0.122336	5.61713	321.713	3.20713	0
SLC2A4	0.877664	0.122336	5.61713	321.713	3.20713	0
SLED1	0.877664	0.122336	5.61713	321.713	3.20713	0
SNCAIP	0.877664	0.122336	5.61713	321.713	3.20713	0
SNORA44	0.877664	0.122336	5.61713	321.713	3.20713	0
SSUH2	0.877664	0.122336	5.61713	321.713	3.20713	0
TECTA	0.877664	0.122336	5.61713	321.713	3.20713	0
TRPC7-AS2	0.877664	0.122336	5.61713	321.713	3.20713	0
TYRP1	0.877664	0.122336	5.61713	321.713	3.20713	0
ZNF812	0.877664	0.122336	5.61713	321.713	3.20713	0
ALG1L	1.96377e-07	1	5.60585	5.66203	317.827	56.1249
PRSS3P2	0.878421	0.121579	5.60174	320.644	3.19644	0
ANKRD45	0.879174	0.120826	5.58635	319.575	3.18575	0
GCNT3	4.00604e-08	1	5.58068	5.61088	582.63	103.831
TP53INP2	9.55333e-08	1	5.54767	5.58825	428.687	76.704
CPB2-AS1	0.265204	0.734796	5.54562	7.01076	14.8811	2.11404
HLA-DRB1	3.51473e-08	1	5.50501	5.52843	728.02	131.678
LINC00937	0.607682	0.392318	5.49406	8.48232	8.72341	1.0196
MRPL42P5	0.88361	0.11639	5.49401	313.161	3.12161	0
GTF2H2C	0.00262395	0.997376	5.4648	5.83568	48.0856	8.23165
SULT1C2	0.0686961	0.931304	5.4581	6.27163	23.519	3.74166
GPX2	1.79534e-07	1	5.44529	5.48809	390.201	71.0915
DUSP13	0.00432129	0.995679	5.44459	5.85066	43.8308	7.48331
SPTLC3	0.000599842	0.9994	5.43956	5.71009	64.1427	11.225
AZGP1	1.73129e-08	1	5.42545	5.42773	7209.64	1328.29
CIB2	0.00855875	0.991441	5.40975	5.87011	38.4856	6.5479
CMPK2	0.170446	0.829554	5.38964	6.45675	18.1738	2.80624
ASAP3	2.59205e-06	0.999997	5.38794	5.47243	194.566	35.5457
SLC22A18	4.51687e-08	1	5.38682	5.40605	844.546	156.214
PIR	1.51703e-07	1	5.36551	5.40023	464.778	86.0581
MIR548XHG	2.41183e-07	1	5.36194	5.40321	390.939	72.3449
MGAM	2.45487e-05	0.999975	5.34185	5.4742	122.94	22.4499
GK	0.000382095	0.999618	5.32179	5.54755	72.6951	13.0958
ANXA9	0.00127612	0.998724	5.31884	5.60591	57.7284	10.2896
LACAT8	0.00581742	0.994183	5.31386	5.70799	42.7618	7.48331
TMEM71	0.0409388	0.959061	5.30369	5.93231	27.7952	4.67707
REEP6	3.74715e-08	1	5.27947	5.28845	1726.51	326.46
PLA2G4E	0.00016535	0.999835	5.27672	5.46072	86.8813	15.902
PEX11G	0.000310862	0.999689	5.27412	5.48252	76.9712	14.0312
AGPAT4-IT1	0.39786	0.60214	5.27127	6.826	12.8285	1.87083
C1orf21	0.39786	0.60214	5.27127	6.826	12.8285	1.87083
C1orf61	0.39786	0.60214	5.27127	6.826	12.8285	1.87083
CATSPERG	0.39786	0.60214	5.27127	6.826	12.8285	1.87083
FAM183A	0.39786	0.60214	5.27127	6.826	12.8285	1.87083
GGTA1P	0.39786	0.60214	5.27127	6.826	12.8285	1.87083
KIAA1683	0.39786	0.60214	5.27127	6.826	12.8285	1.87083
LINC00240	0.39786	0.60214	5.27127	6.826	12.8285	1.87083
LOC100270746	0.39786	0.60214	5.27127	6.826	12.8285	1.87083
LRRC73	0.39786	0.60214	5.27127	6.826	12.8285	1.87083
PPP1R3G	0.39786	0.60214	5.27127	6.826	12.8285	1.87083
STOX1	0.39786	0.60214	5.27127	6.826	12.8285	1.87083
CCDC153	0.0117215	0.988279	5.26215	5.7071	37.4166	6.5479
ORAI3	2.74093e-06	0.999997	5.24235	5.31454	213.809	40.2228
EIF3C	1.32874e-07	1	5.23295	5.25695	634.735	120.734
APOE	9.82494e-08	1	5.2326	5.25246	766.505	145.925
LOC105373383	0.0984342	0.901566	5.21712	5.98667	22.4499	3.74166
SOX2-OT	0.0984342	0.901566	5.21712	5.98667	22.4499	3.74166
S100A4	3.09796e-07	1	5.20971	5.24394	441.516	84.1873
MX1	6.08747e-08	1	5.20379	5.2149	1351.27	259.11
GYG2	2.75371e-05	0.999972	5.19876	5.31691	129.354	24.3208
RPGRIP1	0.0252045	0.974796	5.19509	5.7059	32.0713	5.61249
LINC01125	0.00783586	0.992164	5.18314	5.56533	41.6928	7.48331
SNAI3-AS1	0.00290766	0.997092	5.17564	5.48092	51.3142	9.35414
KMO	4.80209e-07	1	5.16093	5.19806	398.754	76.704
TCEA3	1.57003e-05	0.999984	5.13595	5.23356	151.804	28.9978
HCP5	2.86501e-06	0.999997	5.12664	5.18954	233.052	44.8999
HNF1A	2.86501e-06	0.999997	5.12664	5.18954	233.052	44.8999
RASSF4	5.67133e-07	0.999999	5.09422	5.12905	412.651	80.4456
GATM	0.23955	0.76045	5.08428	6.07715	17.1047	2.80624
GSTT1-AS1	0.23955	0.76045	5.08428	6.07715	17.1047	2.80624
LINC01456	0.23955	0.76045	5.08428	6.07715	17.1047	2.80624
PLIN5	0.23955	0.76045	5.08428	6.07715	17.1047	2.80624
RIPK3	0.23955	0.76045	5.08428	6.07715	17.1047	2.80624
RTP4	0.23955	0.76045	5.08428	6.07715	17.1047	2.80624
MAGIX	0.00159012	0.99841	5.08081	5.32948	59.8665	11.225
RASGEF1A	5.62151e-05	0.999944	5.04555	5.16393	120.802	23.3854
PLA2G4F	0.0350553	0.964945	5.02559	5.51576	31.0023	5.61249
RHCG	0.0350553	0.964945	5.02559	5.51576	31.0023	5.61249
TMC6	2.39106e-07	1	5.01742	5.03524	777.196	154.343
APOC1P1	0.720693	0.279307	5.01704	7.92596	7.48331	0.935414
BTBD16	0.720693	0.279307	5.01704	7.92596	7.48331	0.935414
CCDC170	0.720693	0.279307	5.01704	7.92596	7.48331	0.935414
GLOD5	0.720693	0.279307	5.01704	7.92596	7.48331	0.935414
HOXB4	0.720693	0.279307	5.01704	7.92596	7.48331	0.935414
KIAA0319	0.720693	0.279307	5.01704	7.92596	7.48331	0.935414
LDLRAD1	0.720693	0.279307	5.01704	7.92596	7.48331	0.935414
LINC01091	0.720693	0.279307	5.01704	7.92596	7.48331	0.935414
LOC101927630	0.720693	0.279307	5.01704	7.92596	7.48331	0.935414
LOC643733	0.720693	0.279307	5.01704	7.92596	7.48331	0.935414
S100A12	0.720693	0.279307	5.01704	7.92596	7.48331	0.935414
S100A7A	0.720693	0.279307	5.01704	7.92596	7.48331	0.935414
FBLN5	0.000219904	0.99978	5.01598	5.17059	91.9379	17.7729
EFNB3	0.00011459	0.999885	5.00759	5.14084	105.835	20.5791
LY75-CD302	0.905016	0.0949839	5.00151	278.952	2.77952	0
CBLB	8.41678e-06	0.999992	5.00071	5.07211	194.566	38.352
C15orf62	4.05673e-05	0.999959	4.99606	5.10048	133.631	26.1916
H2AFB2	0.726072	0.273928	4.98425	7.86942	7.42986	0.935414
IFI44L	1.43035e-07	1	4.97833	4.98561	1865.48	374.166
BEST1	0.139179	0.860821	4.97614	5.70172	21.3809	3.74166
CYP3A5	0.139179	0.860821	4.97614	5.70172	21.3809	3.74166
LCAL1	2.25527e-05	0.999977	4.96701	5.05496	156.081	30.8687
ACE	0.0219631	0.978037	4.96693	5.38106	35.2785	6.5479
MX2	1.17133e-05	0.999988	4.9648	5.03919	183.876	36.4812
RNF144A	0.733489	0.266511	4.93834	7.79027	7.35503	0.935414
LGSN	0.000474056	0.999526	4.93726	5.10666	81.2474	15.902
METTL7A	0.0035607	0.996439	4.92953	5.19073	53.4522	10.2896
PIK3IP1	0.0035607	0.996439	4.92953	5.19073	53.4522	10.2896
ACSL1	2.36324e-07	1	4.92833	4.93992	1146.02	231.983
UPK1B	0.272787	0.727213	4.9229	5.85791	16.8161	2.86237
ABCA4	0.081243	0.918757	4.90566	5.47614	25.6571	4.67707
TLE6	0.081243	0.918757	4.90566	5.47614	25.6571	4.67707
S100A7	3.09734e-07	1	4.90365	4.91738	956.795	194.566
OPLAH	1.21968e-05	0.999988	4.88372	4.95138	194.566	39.2874
CA11	1.55758e-06	0.999998	4.88094	4.91516	381.649	77.6394
ANKDD1B	0.000120164	0.99988	4.87995	4.99822	112.25	22.4499
XAF1	1.15708e-06	0.999999	4.87844	4.90831	436.213	88.8644
MVD	2.16815e-07	1	4.87404	4.87715	4160.72	853.098
IDUA	0.000580096	0.99942	4.87285	5.03948	80.1784	15.902
GPCPD1	4.20337e-07	1	4.86322	4.87843	848.822	173.987
TBXAS1	0.00047078	0.999529	4.85677	5.01349	84.4546	16.8375
CATSPER3	0.514303	0.485697	4.85456	6.25761	11.7595	1.87083
CCDC114	0.514303	0.485697	4.85456	6.25761	11.7595	1.87083
FAM223A	0.514303	0.485697	4.85456	6.25761	11.7595	1.87083
FAM223B	0.514303	0.485697	4.85456	6.25761	11.7595	1.87083
SLC28A3	6.78568e-06	0.999993	4.84617	4.9003	238.397	48.6415
IFI27	3.09714e-07	1	4.82733	4.82892	7918.42	1639.78
TIAF1	8.59181e-07	0.999999	4.82225	4.8443	574.986	118.685
GPR143	0.0300102	0.96999	4.81933	5.21805	34.2094	6.5479
FABP6	3.89541e-05	0.999961	4.79115	4.87273	155.012	31.8041
LIPH	1.12055e-06	0.999999	4.78789	4.81118	535.592	111.314
LINC01372	0.325556	0.674444	4.77891	5.69755	16.0357	2.80624
SLC26A10	0.325556	0.674444	4.77891	5.69755	16.0357	2.80624
LGALS12	0.000269446	0.999731	4.75633	4.88123	100.49	20.5791
SERPINA3	4.34783e-07	1	4.73571	4.74136	2146.64	452.741
CES1	0.339744	0.660256	4.7331	5.64061	15.8753	2.80624
RHBG	0.231662	0.768338	4.72821	5.46355	18.9542	3.46103
GPR35	2.10144e-06	0.999998	4.71247	4.7391	452.206	95.4123
UBXN10	0.000382928	0.999617	4.71227	4.84158	95.145	19.6437
ATP5J2-PTCD1	4.41914e-06	0.999996	4.70834	4.74507	327.962	69.1084
FOXP2	0.112968	0.887032	4.70665	5.24806	24.588	4.67707
GPHA2	0.112968	0.887032	4.70665	5.24806	24.588	4.67707
GCHFR	6.40579e-07	0.999999	4.70225	4.71207	1216.57	258.174
ASRGL1	5.63661e-07	0.999999	4.67587	4.67968	3094.89	661.338
AZIN1-AS1	0.000847811	0.999152	4.67384	4.82313	81.2474	16.8375
TP53I11	7.86982e-06	0.999992	4.67326	4.71592	277.952	58.9311
NYNRIN	0.00045767	0.999542	4.65971	4.78719	94.076	19.6437
GJC3	0.0167554	0.983245	4.65113	4.94769	41.6928	8.41873
CRAT	7.22646e-07	0.999999	4.6406	4.64715	1769.27	380.714
S100P	2.57193e-05	0.999974	4.63837	4.69753	197.773	42.0936
LINC01268	0.00291874	0.997081	4.6241	4.81341	63.0737	13.0958
PCSK4	0.00291874	0.997081	4.6241	4.81341	63.0737	13.0958
SMIM22	9.50819e-07	0.999999	4.60703	4.61554	1338.44	289.978
DDX11L10	0.91982	0.0801803	4.60136	251.157	2.50157	0
FXYD3	3.01481e-06	0.999997	4.59883	4.62256	480.001	103.831
PLEKHS1	3.66559e-05	0.999963	4.58918	4.65026	187.083	40.2228
IGF1	0.000885766	0.999114	4.58817	4.72616	84.1231	17.7916
HID1	1.50327e-06	0.999998	4.5874	4.60114	822.096	178.664
SLC7A7	1.8299e-06	0.999998	4.58315	4.59924	701.293	152.473
IMPG2	0.92087	0.0791304	4.57058	249.018	2.48018	0
FUT6	0.382142	0.617858	4.56826	5.41874	15.5546	2.86237
SNTB1	4.07751e-05	0.999959	4.56305	4.62368	186.014	40.2228
FAM174B	0.000200753	0.999799	4.55868	4.65167	121.871	26.1916
MVK	1.44904e-06	0.999999	4.55547	4.56645	1012.39	221.693
AMN	0.000999741	0.999	4.55287	4.68965	83.3855	17.7729
IL4I1	0.0330128	0.966987	4.55044	4.87482	36.5186	7.48331
SRCIN1	0.00700746	0.992993	4.54268	4.75856	53.4522	11.225
HLA-DRB5	6.23554e-05	0.999938	4.53596	4.60191	168.909	36.6963
CLEC2D	1.65073e-05	0.999983	4.53004	4.57288	257.971	56.4055
USH1C	0.0346019	0.965398	4.52953	4.852	36.3475	7.48331
LINC00482	0.0555606	0.944439	4.52411	4.89202	32.0713	6.5479
IFIT1	6.26097e-06	0.999994	4.51819	4.54617	391.27	86.0581
AK8	0.0918391	0.908161	4.5171	4.94535	27.7952	5.61249
FRAT1	0.0918391	0.908161	4.5171	4.94535	27.7952	5.61249
LOC101927204	0.000442259	0.999558	4.51043	4.61744	103.697	22.4499
PTHLH	1.99234e-06	0.999998	4.50616	4.5181	908.688	201.114
CEBPA	0.261645	0.738355	4.49418	5.13181	19.2428	3.74166
ADAM28	2.47926e-05	0.999975	4.48441	4.52994	237.328	52.3832
GOLGA7B	9.66317e-06	0.99999	4.48306	4.51453	342.094	75.7686
TSSC2	0.422752	0.577248	4.47965	5.32554	14.988	2.80624
HLA-DPA1	0.424824	0.575176	4.47354	5.31795	14.9666	2.80624
PNPLA7	0.424824	0.575176	4.47354	5.31795	14.9666	2.80624
VWF	0.424824	0.575176	4.47354	5.31795	14.9666	2.80624
CASP1	0.000699979	0.9993	4.47297	4.58777	95.006	20.7007
TMEM8B	0.00017814	0.999822	4.45553	4.53453	135.769	29.9333
NPFFR2	0.429311	0.570689	4.44976	5.28285	14.9666	2.82495
TNFRSF14	1.70506e-05	0.999983	4.44972	4.48685	285.435	63.6082
MARCH3	4.28994e-05	0.999957	4.44919	4.50069	206.326	45.8353
PIR-FIGF	0.924949	0.0750515	4.44746	240.466	2.39466	0
TTC39A	3.69062e-06	0.999996	4.44594	4.462	655.325	146.86
RNF43	2.94875e-05	0.999971	4.44413	4.48913	235.19	52.3832
LRRC24	0.00116614	0.998834	4.44357	4.56952	85.5236	18.7083
CLCNKB	0.628526	0.371474	4.43785	5.68922	10.6904	1.87083
KRTAP5-AS1	0.628526	0.371474	4.43785	5.68922	10.6904	1.87083
SDPR	0.628526	0.371474	4.43785	5.68922	10.6904	1.87083
SMPX	0.628526	0.371474	4.43785	5.68922	10.6904	1.87083
CCDC40	0.0192806	0.980719	4.43094	4.68178	43.8308	9.35414
TNFSF10	5.3699e-06	0.999995	4.41113	4.42974	555.903	125.486
CYP2D6	0.262093	0.737907	4.40977	5.00104	19.7346	3.93809
CCDC64B	6.33845e-06	0.999994	4.40883	4.42945	501.382	113.185
CHI3L2	2.18021e-06	0.999998	4.4068	4.41	3213.55	728.688
LOC391322	0.0755933	0.924407	4.37086	4.72226	31.0023	6.55725
PLXDC1	0.927402	0.072598	4.3705	235.121	2.34121	0
ADCY4	0.814954	0.185046	4.3612	6.79519	6.41427	0.935414
ARHGAP25	0.814954	0.185046	4.3612	6.79519	6.41427	0.935414
ASCL2	0.814954	0.185046	4.3612	6.79519	6.41427	0.935414
BZRAP1	0.814954	0.185046	4.3612	6.79519	6.41427	0.935414
CACNA2D3	0.814954	0.185046	4.3612	6.79519	6.41427	0.935414
DMRTA2	0.814954	0.185046	4.3612	6.79519	6.41427	0.935414
DPY19L2	0.814954	0.185046	4.3612	6.79519	6.41427	0.935414
EML2-AS1	0.814954	0.185046	4.3612	6.79519	6.41427	0.935414
FAM166B	0.814954	0.185046	4.3612	6.79519	6.41427	0.935414
FAM46C	0.814954	0.185046	4.3612	6.79519	6.41427	0.935414
HYAL4	0.814954	0.185046	4.3612	6.79519	6.41427	0.935414
LINC01006	0.814954	0.185046	4.3612	6.79519	6.41427	0.935414
LINC01526	0.814954	0.185046	4.3612	6.79519	6.41427	0.935414
LOC101927768	0.814954	0.185046	4.3612	6.79519	6.41427	0.935414
PRDM6	0.814954	0.185046	4.3612	6.79519	6.41427	0.935414
RAD21L1	0.814954	0.185046	4.3612	6.79519	6.41427	0.935414
RBP5	0.814954	0.185046	4.3612	6.79519	6.41427	0.935414
RTCA-AS1	0.814954	0.185046	4.3612	6.79519	6.41427	0.935414
RUSC1-AS1	0.814954	0.185046	4.3612	6.79519	6.41427	0.935414
SDK1	0.814954	0.185046	4.3612	6.79519	6.41427	0.935414
SHD	0.814954	0.185046	4.3612	6.79519	6.41427	0.935414
STON1	0.814954	0.185046	4.3612	6.79519	6.41427	0.935414
TF	0.814954	0.185046	4.3612	6.79519	6.41427	0.935414
PRDM7	0.815753	0.184247	4.35464	6.78388	6.40358	0.935414
EMID1	0.12458	0.87542	4.3476	4.75521	26.7261	5.61249
STARD10	3.10942e-06	0.999997	4.3361	4.33974	2723.93	627.663
HAVCR2	0.641118	0.358882	4.33232	5.49886	10.7439	1.94566
LOC101927419	0.92884	0.0711604	4.32433	231.914	2.30914	0
GGT7	2.20501e-05	0.999978	4.32004	4.35119	317.506	72.9623
FAM157B	0.718322	0.281678	4.31063	5.7523	9.03343	1.56214
CES1P2	0.929313	0.0706869	4.30894	230.845	2.29845	0
ODF3B	0.208885	0.791115	4.30862	4.79189	22.4499	4.67707
LOC100652768	0.00278739	0.997213	4.30798	4.4424	74.8331	16.8375
FUNDC2P2	0.929784	0.0702163	4.29355	229.776	2.28776	0
PLEKHH2	0.00124247	0.998758	4.26719	4.3711	94.076	21.5145
CX3CL1	5.44128e-06	0.999995	4.2659	4.27441	1123.57	262.851
OAS1	7.03616e-06	0.999993	4.26217	4.27411	799.646	187.083
DHRS12	0.000809499	0.999191	4.25858	4.35027	105.835	24.3208
CPAMD8	0.343761	0.656239	4.2532	4.84686	18.1738	3.74166
HACD4	0.343761	0.656239	4.2532	4.84686	18.1738	3.74166
LRRC39	0.343761	0.656239	4.2532	4.84686	18.1738	3.74166
NCALD	0.343761	0.656239	4.2532	4.84686	18.1738	3.74166
PNMA6A	0.343761	0.656239	4.2532	4.84686	18.1738	3.74166
TTC6	0.0217748	0.978225	4.24825	4.46417	45.9689	10.2896
ZFP57	0.0217748	0.978225	4.24825	4.46417	45.9689	10.2896
ATP8A1	0.00040171	0.999598	4.2461	4.32032	129.354	29.9333
LMF1	0.000467284	0.999533	4.23585	4.31222	125.078	28.9978
NUPR1	0.100704	0.899296	4.2289	4.56598	29.9333	6.5479
LYPD6B	0.000123859	0.999876	4.22862	4.27889	188.152	43.9645
MDK	7.15155e-06	0.999993	4.22434	4.22537	9059.09	2143.97
C2	0.0329792	0.967021	4.21817	4.45345	41.6928	9.35414
LOC101928254	0.932549	0.0674506	4.20121	223.361	2.22361	0
IDO1	2.69605e-05	0.999973	4.19617	4.22116	369.654	87.5641
UBA7	6.60304e-05	0.999934	4.18917	4.22621	249.087	58.9311
ABCA13	0.0347543	0.965246	4.18769	4.41913	41.6607	9.41962
LINC00491	0.933001	0.0669993	4.18582	222.292	2.21292	0
CSTA	0.0513391	0.948661	4.18191	4.44036	37.4166	8.41873
DRC3	0.52991	0.47009	4.16818	4.93835	13.8976	2.80624
LOC100505912	0.52991	0.47009	4.16818	4.93835	13.8976	2.80624
MIATNB	0.52991	0.47009	4.16818	4.93835	13.8976	2.80624
PRSS8	7.4563e-06	0.999993	4.16761	4.17076	2871.45	688.465
GUCY1B2	0.00135513	0.998645	4.15764	4.25004	99.4212	23.3854
TRIM46	0.000728877	0.999271	4.15059	4.22742	118.664	28.0624
ADM2	9.42571e-05	0.999906	4.14537	4.1843	231.47	55.3111
ALDH3B2	0.00336774	0.996632	4.13803	4.2535	79.1307	18.596
SEC24B-AS1	0.702728	0.297272	4.13782	5.27998	9.92074	1.87083
PLXND1	3.10479e-05	0.999969	4.13405	4.15653	396.616	95.4123
WBSCR27	2.2679e-05	0.999977	4.11579	4.13294	514.211	124.41
SLC9A4	0.00141195	0.998588	4.11439	4.20257	101.613	24.1711
ILDR1	0.00159507	0.998405	4.11324	4.20434	98.3521	23.3854
PART1	0.935217	0.0647831	4.10887	216.947	2.15947	0
PDE11A	0.935217	0.0647831	4.10887	216.947	2.15947	0
SERPINA5	6.01186e-05	0.99994	4.10233	4.13144	301.471	72.9623
DHX58	9.29294e-05	0.999907	4.09649	4.13135	251.226	60.8019
ADAMTSL2	0.935652	0.0643479	4.09348	215.878	2.14878	0
LOC644669	0.935652	0.0643479	4.09348	215.878	2.14878	0
BST2	1.21029e-05	0.999988	4.09094	4.09276	4762.6	1163.66
SLC22A31	0.000368502	0.999631	4.08558	4.14202	155.012	37.4166
ITGA1	0.000323022	0.999677	4.08157	4.13526	162.495	39.2874
CD70	0.00334749	0.996653	4.08151	4.18885	82.3165	19.6437
AANAT	0.936085	0.0639153	4.07809	214.809	2.13809	0
ACKR2	0.936085	0.0639153	4.07809	214.809	2.13809	0
ACKR3	0.936085	0.0639153	4.07809	214.809	2.13809	0
ADH4	0.936085	0.0639153	4.07809	214.809	2.13809	0
AFF3	0.936085	0.0639153	4.07809	214.809	2.13809	0
AFM	0.936085	0.0639153	4.07809	214.809	2.13809	0
AMBP	0.936085	0.0639153	4.07809	214.809	2.13809	0
ANKRD26P1	0.936085	0.0639153	4.07809	214.809	2.13809	0
APOBR	0.936085	0.0639153	4.07809	214.809	2.13809	0
BANCR	0.936085	0.0639153	4.07809	214.809	2.13809	0
BLACE	0.936085	0.0639153	4.07809	214.809	2.13809	0
BVES-AS1	0.936085	0.0639153	4.07809	214.809	2.13809	0
C1orf167	0.936085	0.0639153	4.07809	214.809	2.13809	0
C1orf95	0.936085	0.0639153	4.07809	214.809	2.13809	0
C20orf202	0.936085	0.0639153	4.07809	214.809	2.13809	0
C2CD4B	0.936085	0.0639153	4.07809	214.809	2.13809	0
CACNB2	0.936085	0.0639153	4.07809	214.809	2.13809	0
CAMP	0.936085	0.0639153	4.07809	214.809	2.13809	0
CAPN9	0.936085	0.0639153	4.07809	214.809	2.13809	0
CCDC184	0.936085	0.0639153	4.07809	214.809	2.13809	0
CCR9	0.936085	0.0639153	4.07809	214.809	2.13809	0
CD81-AS1	0.936085	0.0639153	4.07809	214.809	2.13809	0
CDH15	0.936085	0.0639153	4.07809	214.809	2.13809	0
CECR5-AS1	0.936085	0.0639153	4.07809	214.809	2.13809	0
CFAP126	0.936085	0.0639153	4.07809	214.809	2.13809	0
COL9A3	0.936085	0.0639153	4.07809	214.809	2.13809	0
CPO	0.936085	0.0639153	4.07809	214.809	2.13809	0
CSTF3-AS1	0.936085	0.0639153	4.07809	214.809	2.13809	0
CXADRP3	0.936085	0.0639153	4.07809	214.809	2.13809	0
CYP2A7	0.936085	0.0639153	4.07809	214.809	2.13809	0
DKFZP434A062	0.936085	0.0639153	4.07809	214.809	2.13809	0
DRC1	0.936085	0.0639153	4.07809	214.809	2.13809	0
DSCR9	0.936085	0.0639153	4.07809	214.809	2.13809	0
ESRRG	0.936085	0.0639153	4.07809	214.809	2.13809	0
EVA1C	0.936085	0.0639153	4.07809	214.809	2.13809	0
FAM151A	0.936085	0.0639153	4.07809	214.809	2.13809	0
FAM209A	0.936085	0.0639153	4.07809	214.809	2.13809	0
FBXO39	0.936085	0.0639153	4.07809	214.809	2.13809	0
FLRT1	0.936085	0.0639153	4.07809	214.809	2.13809	0
FOCAD-AS1	0.936085	0.0639153	4.07809	214.809	2.13809	0
GAS5-AS1	0.936085	0.0639153	4.07809	214.809	2.13809	0
GDPD2	0.936085	0.0639153	4.07809	214.809	2.13809	0
GIPC2	0.936085	0.0639153	4.07809	214.809	2.13809	0
GIPC3	0.936085	0.0639153	4.07809	214.809	2.13809	0
GPBAR1	0.936085	0.0639153	4.07809	214.809	2.13809	0
GSTA1	0.936085	0.0639153	4.07809	214.809	2.13809	0
GSTA3	0.936085	0.0639153	4.07809	214.809	2.13809	0
HEATR4	0.936085	0.0639153	4.07809	214.809	2.13809	0
HEPACAM2	0.936085	0.0639153	4.07809	214.809	2.13809	0
HIST1H2BE	0.936085	0.0639153	4.07809	214.809	2.13809	0
HRG	0.936085	0.0639153	4.07809	214.809	2.13809	0
HUNK	0.936085	0.0639153	4.07809	214.809	2.13809	0
IFIT1B	0.936085	0.0639153	4.07809	214.809	2.13809	0
IGFALS	0.936085	0.0639153	4.07809	214.809	2.13809	0
IL2	0.936085	0.0639153	4.07809	214.809	2.13809	0
IL33	0.936085	0.0639153	4.07809	214.809	2.13809	0
KCND2	0.936085	0.0639153	4.07809	214.809	2.13809	0
KCNH6	0.936085	0.0639153	4.07809	214.809	2.13809	0
KCNK15	0.936085	0.0639153	4.07809	214.809	2.13809	0
LAMB2P1	0.936085	0.0639153	4.07809	214.809	2.13809	0
LIN28A	0.936085	0.0639153	4.07809	214.809	2.13809	0
LINC00475	0.936085	0.0639153	4.07809	214.809	2.13809	0
LINC00515	0.936085	0.0639153	4.07809	214.809	2.13809	0
LINC00521	0.936085	0.0639153	4.07809	214.809	2.13809	0
LINC00589	0.936085	0.0639153	4.07809	214.809	2.13809	0
LINC00648	0.936085	0.0639153	4.07809	214.809	2.13809	0
LINC00933	0.936085	0.0639153	4.07809	214.809	2.13809	0
LINC01021	0.936085	0.0639153	4.07809	214.809	2.13809	0
LINC01122	0.936085	0.0639153	4.07809	214.809	2.13809	0
LINC01224	0.936085	0.0639153	4.07809	214.809	2.13809	0
LINC01269	0.936085	0.0639153	4.07809	214.809	2.13809	0
LINC01433	0.936085	0.0639153	4.07809	214.809	2.13809	0
LINC01606	0.936085	0.0639153	4.07809	214.809	2.13809	0
LMO7-AS1	0.936085	0.0639153	4.07809	214.809	2.13809	0
LOC100131289	0.936085	0.0639153	4.07809	214.809	2.13809	0
LOC100507283	0.936085	0.0639153	4.07809	214.809	2.13809	0
LOC101926913	0.936085	0.0639153	4.07809	214.809	2.13809	0
LOC101927100	0.936085	0.0639153	4.07809	214.809	2.13809	0
LOC101927668	0.936085	0.0639153	4.07809	214.809	2.13809	0
LOC105372280	0.936085	0.0639153	4.07809	214.809	2.13809	0
LOC105375401	0.936085	0.0639153	4.07809	214.809	2.13809	0
LOC105375650	0.936085	0.0639153	4.07809	214.809	2.13809	0
LOC115110	0.936085	0.0639153	4.07809	214.809	2.13809	0
LOC283731	0.936085	0.0639153	4.07809	214.809	2.13809	0
LOC339260	0.936085	0.0639153	4.07809	214.809	2.13809	0
LOC644936	0.936085	0.0639153	4.07809	214.809	2.13809	0
LRRC66	0.936085	0.0639153	4.07809	214.809	2.13809	0
LURAP1	0.936085	0.0639153	4.07809	214.809	2.13809	0
MACC1-AS1	0.936085	0.0639153	4.07809	214.809	2.13809	0
MAFB	0.936085	0.0639153	4.07809	214.809	2.13809	0
MAGEB16	0.936085	0.0639153	4.07809	214.809	2.13809	0
MEGF10	0.936085	0.0639153	4.07809	214.809	2.13809	0
MEGF11	0.936085	0.0639153	4.07809	214.809	2.13809	0
METTL21EP	0.936085	0.0639153	4.07809	214.809	2.13809	0
MFAP2	0.936085	0.0639153	4.07809	214.809	2.13809	0
MGC16025	0.936085	0.0639153	4.07809	214.809	2.13809	0
MGC45922	0.936085	0.0639153	4.07809	214.809	2.13809	0
MIR5047	0.936085	0.0639153	4.07809	214.809	2.13809	0
MN1	0.936085	0.0639153	4.07809	214.809	2.13809	0
MS4A15	0.936085	0.0639153	4.07809	214.809	2.13809	0
MYOG	0.936085	0.0639153	4.07809	214.809	2.13809	0
MYOM1	0.936085	0.0639153	4.07809	214.809	2.13809	0
NMUR1	0.936085	0.0639153	4.07809	214.809	2.13809	0
NR2E1	0.936085	0.0639153	4.07809	214.809	2.13809	0
NR5A1	0.936085	0.0639153	4.07809	214.809	2.13809	0
ORM1	0.936085	0.0639153	4.07809	214.809	2.13809	0
PDE1A	0.936085	0.0639153	4.07809	214.809	2.13809	0
PDIA2	0.936085	0.0639153	4.07809	214.809	2.13809	0
PDZD3	0.936085	0.0639153	4.07809	214.809	2.13809	0
PERM1	0.936085	0.0639153	4.07809	214.809	2.13809	0
PFN1P2	0.936085	0.0639153	4.07809	214.809	2.13809	0
PKD1L1	0.936085	0.0639153	4.07809	214.809	2.13809	0
PKD1L3	0.936085	0.0639153	4.07809	214.809	2.13809	0
PLA2G5	0.936085	0.0639153	4.07809	214.809	2.13809	0
PLCL1	0.936085	0.0639153	4.07809	214.809	2.13809	0
PPP1R27	0.936085	0.0639153	4.07809	214.809	2.13809	0
PRDM16	0.936085	0.0639153	4.07809	214.809	2.13809	0
PRSS27	0.936085	0.0639153	4.07809	214.809	2.13809	0
PRSS30P	0.936085	0.0639153	4.07809	214.809	2.13809	0
PTCSC3	0.936085	0.0639153	4.07809	214.809	2.13809	0
PYCARD-AS1	0.936085	0.0639153	4.07809	214.809	2.13809	0
PYY	0.936085	0.0639153	4.07809	214.809	2.13809	0
QPCT	0.936085	0.0639153	4.07809	214.809	2.13809	0
RAET1E-AS1	0.936085	0.0639153	4.07809	214.809	2.13809	0
RARRES1	0.936085	0.0639153	4.07809	214.809	2.13809	0
RBFADN	0.936085	0.0639153	4.07809	214.809	2.13809	0
RHOXF1	0.936085	0.0639153	4.07809	214.809	2.13809	0
RIIAD1	0.936085	0.0639153	4.07809	214.809	2.13809	0
RNF150	0.936085	0.0639153	4.07809	214.809	2.13809	0
RUNX3	0.936085	0.0639153	4.07809	214.809	2.13809	0
S100A1	0.936085	0.0639153	4.07809	214.809	2.13809	0
SALL4	0.936085	0.0639153	4.07809	214.809	2.13809	0
SCARNA8	0.936085	0.0639153	4.07809	214.809	2.13809	0
SEMA6A-AS1	0.936085	0.0639153	4.07809	214.809	2.13809	0
SERPINC1	0.936085	0.0639153	4.07809	214.809	2.13809	0
SFRP2	0.936085	0.0639153	4.07809	214.809	2.13809	0
SLA2	0.936085	0.0639153	4.07809	214.809	2.13809	0
SLC12A5	0.936085	0.0639153	4.07809	214.809	2.13809	0
SLC30A2	0.936085	0.0639153	4.07809	214.809	2.13809	0
SLC35G5	0.936085	0.0639153	4.07809	214.809	2.13809	0
SLC4A10	0.936085	0.0639153	4.07809	214.809	2.13809	0
SLC8A1-AS1	0.936085	0.0639153	4.07809	214.809	2.13809	0
SNORA15	0.936085	0.0639153	4.07809	214.809	2.13809	0
SNORA27	0.936085	0.0639153	4.07809	214.809	2.13809	0
SNORA61	0.936085	0.0639153	4.07809	214.809	2.13809	0
SNORD15B	0.936085	0.0639153	4.07809	214.809	2.13809	0
SPAG17	0.936085	0.0639153	4.07809	214.809	2.13809	0
SPAG8	0.936085	0.0639153	4.07809	214.809	2.13809	0
SSX4	0.936085	0.0639153	4.07809	214.809	2.13809	0
ST8SIA6	0.936085	0.0639153	4.07809	214.809	2.13809	0
SULT1B1	0.936085	0.0639153	4.07809	214.809	2.13809	0
TAAR3	0.936085	0.0639153	4.07809	214.809	2.13809	0
TENM4	0.936085	0.0639153	4.07809	214.809	2.13809	0
TEX43	0.936085	0.0639153	4.07809	214.809	2.13809	0
THRB-AS1	0.936085	0.0639153	4.07809	214.809	2.13809	0
THSD7A	0.936085	0.0639153	4.07809	214.809	2.13809	0
TLR9	0.936085	0.0639153	4.07809	214.809	2.13809	0
TMEM169	0.936085	0.0639153	4.07809	214.809	2.13809	0
TMIE	0.936085	0.0639153	4.07809	214.809	2.13809	0
TONSL-AS1	0.936085	0.0639153	4.07809	214.809	2.13809	0
UG0898H09	0.936085	0.0639153	4.07809	214.809	2.13809	0
UGT2B11	0.936085	0.0639153	4.07809	214.809	2.13809	0
USP12-AS2	0.936085	0.0639153	4.07809	214.809	2.13809	0
USP30-AS1	0.936085	0.0639153	4.07809	214.809	2.13809	0
VCAM1	0.936085	0.0639153	4.07809	214.809	2.13809	0
TSPAN1	1.3443e-05	0.999987	4.07713	4.07872	5398.68	1323.61
S100A9	2.20559e-05	0.999978	4.06331	4.06378	17877.6	4399.25
APOC1	1.82982e-05	0.999982	4.06176	4.07228	811.405	199.243
MMAB	1.33252e-05	0.999987	4.0577	4.06214	1915.73	471.598
PI3	4.83788e-05	0.999952	4.05214	4.0747	377.373	92.606
DISP1	0.00233587	0.997664	4.04853	4.14146	93.0069	22.4499
TMC4	4.02893e-05	0.99996	4.04572	4.06545	429.756	105.702
BRINP2	0.728979	0.271021	4.02114	5.12083	9.6214	1.87083
CYTIP	0.728979	0.271021	4.02114	5.12083	9.6214	1.87083
GAL3ST1	0.728979	0.271021	4.02114	5.12083	9.6214	1.87083
SALL2	0.728979	0.271021	4.02114	5.12083	9.6214	1.87083
STX1B	0.728979	0.271021	4.02114	5.12083	9.6214	1.87083
SULF1	0.728979	0.271021	4.02114	5.12083	9.6214	1.87083
TEX22	0.728979	0.271021	4.02114	5.12083	9.6214	1.87083
WNT2B	0.728979	0.271021	4.02114	5.12083	9.6214	1.87083
SPSB2	1.78211e-05	0.999982	4.01878	4.02534	1268.96	315.235
KIT	0.000128209	0.999872	4.01799	4.05145	250.157	61.7373
FOXO6	0.435921	0.564079	4.01223	4.56191	17.1047	3.74166
KLHL41	0.435921	0.564079	4.01223	4.56191	17.1047	3.74166
LOC105274304	0.435921	0.564079	4.01223	4.56191	17.1047	3.74166
CYP2C18	0.219624	0.780376	4.0086	4.37494	24.588	5.61249
KLHDC7A	0.0309677	0.969032	4.00455	4.18764	47.038	11.225
MKRN2OS	0.0309677	0.969032	4.00455	4.18764	47.038	11.225
CARD16	0.000485986	0.999514	4.00373	4.0575	155.15	38.2304
DENND6B	0.00758885	0.992411	4.00309	4.12513	69.4879	16.8375
CAPN12	0.00523057	0.994769	4.0028	4.11262	76.9712	18.7083
LZTS3	1.95772e-05	0.99998	3.99853	4.00482	1307.44	326.46
CFHR3	0.732537	0.267463	3.99203	5.0704	9.6214	1.88954
GALNT6	1.94445e-05	0.999981	3.98653	3.99101	1821.86	456.482
LOC374443	0.000305866	0.999694	3.97862	4.02221	188.152	46.7707
GOLGA6L22	0.731469	0.268531	3.96576	5.00897	9.739	1.93631
TNFSF13	2.59459e-05	0.999974	3.94931	3.95595	1202.68	304.01
SIDT1	0.00631721	0.993683	3.9477	4.05551	75.9022	18.7083
LOC341056	0.86055	0.13945	3.94146	6.0715	5.73008	0.935414
CEACAM1	4.93483e-05	0.999951	3.94077	3.95582	529.177	133.764
ISG15	2.96454e-05	0.99997	3.93602	3.93736	5915.03	1502.28
ARRB1	3.33435e-05	0.999967	3.9353	3.94472	841.338	213.274
GOLGA6L6	0.757321	0.242679	3.92363	5.02055	9.15102	1.8147
C11orf52	0.000243485	0.999757	3.91764	3.95264	225.568	57.0603
RBBP8NL	0.000472035	0.999528	3.91743	3.96285	174.254	43.9645
SNPH	3.87367e-05	0.999961	3.91661	3.92673	775.058	197.372
PCOLCE	0.00165977	0.99834	3.91182	3.98054	115.457	28.9978
SLC16A14	0.35288	0.64712	3.91059	4.33573	20.3119	4.67707
TPPP3	0.35288	0.64712	3.91059	4.33573	20.3119	4.67707
PCDHGA2	0.940673	0.0593272	3.90879	203.049	2.02049	0
IFI6	2.99093e-05	0.99997	3.90467	3.90769	2580.67	660.403
RPRM	0.0200841	0.979916	3.89479	4.03593	56.6594	14.0312
SEMA4G	0.0200841	0.979916	3.89479	4.03593	56.6594	14.0312
ABCA5	0.0733398	0.92666	3.89369	4.10525	38.4322	9.35414
HAGLROS	0.141102	0.858898	3.87591	4.13866	31.0023	7.48331
ANKRD22	4.06835e-05	0.999959	3.87546	3.88301	1013.45	260.99
DICER1-AS1	0.00339127	0.996609	3.87396	3.95483	96.214	24.3208
GLS2	0.0176341	0.982366	3.86694	3.998	59.8665	14.9666
SLC22A18AS	0.000158472	0.999842	3.86582	3.89079	305.747	78.5748
FTCD	0.631479	0.368521	3.86281	4.55875	12.8285	2.80624
GZMM	0.631479	0.368521	3.86281	4.55875	12.8285	2.80624
LINC01124	0.631479	0.368521	3.86281	4.55875	12.8285	2.80624
NDUFA6-AS1	0.631479	0.368521	3.86281	4.55875	12.8285	2.80624
SOWAHD	0.631479	0.368521	3.86281	4.55875	12.8285	2.80624
ATP8B5P	0.630413	0.369587	3.8533	4.54008	12.9034	2.83431
LEMD1	0.28325	0.71675	3.8391	4.1848	23.519	5.61249
RTN4R	0.28325	0.71675	3.8391	4.1848	23.519	5.61249
ACTL10	0.00921645	0.990784	3.8375	3.94128	73.7641	18.7083
IFIT2	0.000545873	0.999454	3.83547	3.87615	184.945	47.7061
GUSBP9	0.942658	0.0573421	3.83184	197.704	1.96704	0
KIAA0087	0.875944	0.124056	3.83069	6.00989	5.33453	0.879289
CLIP3	0.114233	0.885767	3.82999	4.05986	34.2094	8.41873
POC1B-GALNT4	0.000961395	0.999039	3.82692	3.8764	151.633	39.1097
PPFIBP2	0.0138532	0.986147	3.82016	3.93476	66.2808	16.8375
CLDN22	0.84994	0.15006	3.81402	5.44768	6.41427	1.16927
SCD5	0.000690423	0.99931	3.80542	3.84731	176.371	45.8353
FDFT1	7.01004e-05	0.99993	3.80141	3.80228	8453.6	2223.29
FCMR	0.0218215	0.978179	3.79868	3.92662	58.7975	14.9666
DHRS3	5.31246e-05	0.999947	3.79681	3.80051	1965.97	517.284
MYCL	0.0425397	0.95746	3.79631	3.95362	48.107	12.1604
SLC22A23	0.00144037	0.99856	3.79501	3.84882	136.838	35.5457
OPHN1	0.000185296	0.999815	3.79216	3.81386	335.947	88.0786
FSCN2	0.226831	0.773169	3.78608	4.07693	26.7261	6.5479
BRSK2	0.00699021	0.99301	3.78583	3.87444	83.3855	21.5145
LOC728613	0.527202	0.472798	3.7833	4.2912	16.0891	3.74166
VIPR1	0.00229991	0.9977	3.78156	3.84323	118.664	30.8687
FAM47E	0.079544	0.920456	3.78065	3.97084	39.7364	9.99958
SDCBP2	0.000174836	0.999825	3.77809	3.79803	362.406	95.4123
CBLN3	0.531987	0.468013	3.77125	4.27696	16.0357	3.74166
SPAG6	0.531987	0.468013	3.77125	4.27696	16.0357	3.74166
TOB1-AS1	0.531987	0.468013	3.77125	4.27696	16.0357	3.74166
TRANK1	0.00162922	0.998371	3.76551	3.81876	135.769	35.5457
ANKRD36C	0.00131376	0.998686	3.76221	3.8112	147.122	38.5952
DUSP8	0.000342282	0.999658	3.76057	3.78824	258.709	68.2852
RAB11B-AS1	0.00592888	0.994071	3.75808	3.83879	89.7998	23.3854
PCDHB5	0.944582	0.0554176	3.75489	192.359	1.91359	0
SYT1	0.000177258	0.999823	3.75284	3.77116	388.063	102.896
AKR1C3	0.00010806	0.999892	3.75089	3.76267	601.466	159.844
CASC16	0.182048	0.817952	3.74519	3.996	29.9333	7.48331
GOLGA6L10	0.504898	0.495102	3.74344	4.20815	16.9978	4.03164
PSMG3-AS1	0.026981	0.973019	3.73042	3.85524	57.7284	14.9666
C19orf18	0.00761005	0.99239	3.7252	3.80827	85.5236	22.4499
P2RX4	9.74484e-05	0.999903	3.72368	3.73195	841.338	225.435
CACNB3	0.00063816	0.999362	3.72359	3.75737	207.395	55.1894
MMP15	0.00010194	0.999898	3.71306	3.72114	856.305	230.112
SCNN1D	0.146873	0.853127	3.71269	3.93302	33.1404	8.41873
MANSC1	0.000200068	0.9998	3.71235	3.72936	407.274	109.2
LOC388942	0.438622	0.561378	3.71158	4.10764	19.2428	4.67707
SLC1A7	0.438622	0.561378	3.71158	4.10764	19.2428	4.67707
PCDHA9	0.945709	0.0542914	3.70872	189.152	1.88152	0
C11orf16	0.881546	0.118454	3.70535	5.66442	5.34522	0.935414
CFTR	0.881546	0.118454	3.70535	5.66442	5.34522	0.935414
CTSE	0.881546	0.118454	3.70535	5.66442	5.34522	0.935414
EFCAB12	0.881546	0.118454	3.70535	5.66442	5.34522	0.935414
GAS2	0.881546	0.118454	3.70535	5.66442	5.34522	0.935414
IL3RA	0.881546	0.118454	3.70535	5.66442	5.34522	0.935414
LBP	0.881546	0.118454	3.70535	5.66442	5.34522	0.935414
LINC00574	0.881546	0.118454	3.70535	5.66442	5.34522	0.935414
LINC01099	0.881546	0.118454	3.70535	5.66442	5.34522	0.935414
LOC100128531	0.881546	0.118454	3.70535	5.66442	5.34522	0.935414
MYH7B	0.881546	0.118454	3.70535	5.66442	5.34522	0.935414
NTN5	0.881546	0.118454	3.70535	5.66442	5.34522	0.935414
PPP1R36	0.881546	0.118454	3.70535	5.66442	5.34522	0.935414
RAET1K	0.881546	0.118454	3.70535	5.66442	5.34522	0.935414
TCF7L1	0.881546	0.118454	3.70535	5.66442	5.34522	0.935414
TEKT5	0.881546	0.118454	3.70535	5.66442	5.34522	0.935414
TFCP2L1	0.881546	0.118454	3.70535	5.66442	5.34522	0.935414
WARS2-IT1	0.881546	0.118454	3.70535	5.66442	5.34522	0.935414
ZNF835	0.881546	0.118454	3.70535	5.66442	5.34522	0.935414
FAM110C	0.00390235	0.996098	3.69579	3.75942	109.043	28.9978
ZSCAN16-AS1	0.0453824	0.954618	3.69385	3.83457	50.2451	13.0958
KIAA1456	0.883251	0.116749	3.69376	5.66392	5.29177	0.92606
TMEM254-AS1	0.794888	0.205112	3.68778	4.66612	8.76617	1.87083
VAV3	0.119344	0.880656	3.68624	3.88263	36.3475	9.35414
PRRG2	0.00138688	0.998613	3.68339	3.72607	160.357	43.0291
GNG7	0.0387345	0.961266	3.677	3.80752	53.4522	14.0312
LOC344887	0.356501	0.643499	3.6696	3.99466	22.4499	5.61249
BMP8A	0.875477	0.124523	3.66911	5.39681	5.69801	1.04766
CCDC159	0.000945656	0.999054	3.65464	3.68872	196.704	53.3186
MARCH2	0.000238978	0.999761	3.64744	3.66212	452.206	123.475
POU6F1	0.0812192	0.918781	3.64294	3.80386	42.7618	11.2343
DNAH1	0.0117666	0.988233	3.64143	3.72544	80.1784	21.5145
SHISA4	0.00233236	0.997668	3.63178	3.67874	141.114	38.352
TMEM170B	0.00536508	0.994635	3.62672	3.68967	105.397	28.5582
QPRT	0.535028	0.464972	3.62634	4.05533	16.9871	4.1813
NFATC4	0.000163791	0.999836	3.61889	3.62627	881.962	243.208
CH17-340M24.3	0.000931518	0.999068	3.61841	3.64931	211.671	57.9957
VENTX	0.80712	0.19288	3.61693	4.56949	8.58443	1.87083
RHOV	0.000162643	0.999837	3.6148	3.62169	941.829	260.045
FOXD3-AS1	0.231509	0.768491	3.61446	3.85333	28.8642	7.48331
SLC4A8	0.00155098	0.998449	3.61158	3.64977	170.865	46.8081
IL32	0.00816144	0.991839	3.61074	3.68148	93.0069	25.2562
ZFHX2	0.0174155	0.982585	3.60844	3.69931	72.6951	19.6437
TSC22D3	0.000206826	0.999793	3.6071	3.61694	656.394	181.47
CCR1	0.809214	0.190786	3.60443	4.55244	8.55236	1.87083
CHN2	0.809214	0.190786	3.60443	4.55244	8.55236	1.87083
ENHO	0.809214	0.190786	3.60443	4.55244	8.55236	1.87083
HOXC13-AS	0.809214	0.190786	3.60443	4.55244	8.55236	1.87083
KCNN1	0.809214	0.190786	3.60443	4.55244	8.55236	1.87083
LOC101928402	0.809214	0.190786	3.60443	4.55244	8.55236	1.87083
SAPCD1-AS1	0.809214	0.190786	3.60443	4.55244	8.55236	1.87083
UTS2B	0.809214	0.190786	3.60443	4.55244	8.55236	1.87083
ZDHHC8P1	0.809214	0.190786	3.60443	4.55244	8.55236	1.87083
VCX	0.948256	0.0517443	3.60098	181.669	1.80669	0
IBSP	0.18677	0.81323	3.59538	3.80619	32.0713	8.41873
S100A8	0.000381535	0.999618	3.59504	3.612	378.442	104.766
FAM230B	0.890399	0.109601	3.59386	5.47219	5.16349	0.935414
BDH1	0.000345768	0.999654	3.58567	3.60069	424.411	117.862
DFNB31	0.0307332	0.969267	3.57626	3.68095	62.0046	16.8375
DYSF	0.123599	0.876401	3.56697	3.7376	38.4856	10.2896
LOC100287846	0.815384	0.184616	3.56693	4.50128	8.45615	1.87083
FAHD2CP	0.0132487	0.986751	3.56211	3.63909	82.9151	22.7773
LINC01093	0.721425	0.278575	3.55744	4.17915	11.7595	2.80624
N4BP2L1	0.721425	0.278575	3.55744	4.17915	11.7595	2.80624
NTRK2	0.721425	0.278575	3.55744	4.17915	11.7595	2.80624
PAOX	0.721425	0.278575	3.55744	4.17915	11.7595	2.80624
PGF	0.721425	0.278575	3.55744	4.17915	11.7595	2.80624
SPEF2	0.721425	0.278575	3.55744	4.17915	11.7595	2.80624
WFIKKN1	0.721425	0.278575	3.55744	4.17915	11.7595	2.80624
CFHR1	0.949313	0.0506866	3.55481	178.461	1.77461	0
C1orf127	0.0705404	0.92946	3.53881	3.67143	48.107	13.0958
CHADL	0.62476	0.37524	3.53027	3.992	14.9666	3.74166
GJB1	0.62476	0.37524	3.53027	3.992	14.9666	3.74166
TRIM74	0.62476	0.37524	3.53027	3.992	14.9666	3.74166
TRPV4	0.62476	0.37524	3.53027	3.992	14.9666	3.74166
JUND	0.000236492	0.999764	3.52854	3.53095	2543.26	720.269
INSIG1	0.000270606	0.999729	3.514	3.51578	3403.84	968.154
C1QTNF3	0.527435	0.472565	3.51256	3.87956	18.1738	4.67707
STAC3	0.527435	0.472565	3.51256	3.87956	18.1738	4.67707
ARHGEF38	0.0325311	0.967469	3.51089	3.60756	64.1427	17.7729
SEPW1	0.000291788	0.999708	3.50406	3.50569	3692.48	1053.28
TMEM121	0.436591	0.563409	3.5001	3.80453	21.3809	5.61249
TPRN	0.000352832	0.999647	3.49468	3.50321	701.293	200.179
LIMS3-LOC440895	0.950693	0.0493071	3.49325	174.185	1.73185	0
LOC440895	0.950693	0.0493071	3.49325	174.185	1.73185	0
SCG5	0.0159258	0.984074	3.4917	3.56462	83.3855	23.3854
FAAH	0.014393	0.985607	3.48934	3.55939	86.5926	24.3208
RASGRP1	0.00343424	0.996566	3.48908	3.52956	148.597	42.0936
LBX2-AS1	0.0119057	0.988094	3.48511	3.55005	93.0069	26.1916
MMP11	0.289394	0.710606	3.48374	3.71066	27.7952	7.48331
TMEM125	0.000303767	0.999696	3.48358	3.48834	1246.51	357.328
CMTM1	0.870241	0.129759	3.48199	4.73418	6.41427	1.347
ITPKB	0.00237691	0.997623	3.47914	3.51273	177.461	50.5124
ASGR1	0.234359	0.765641	3.47808	3.67936	31.0023	8.41873
VPS9D1	0.00105786	0.998942	3.47472	3.49628	274.745	78.5748
FLRT2	0.190159	0.809841	3.47347	3.65431	34.2094	9.35414
MVB12B	0.155004	0.844996	3.46965	3.6338	37.4166	10.2896
EPHB3	0.105056	0.894944	3.46367	3.60226	43.8308	12.1604
SMA5	0.00236674	0.997633	3.46282	3.49497	183.266	52.43
MUC1	0.000359617	0.99964	3.46214	3.46394	3243.48	936.35
FDPS	0.000561107	0.999439	3.45811	3.45861	11692.1	3380.59
HABP2	0.0015779	0.998422	3.45122	3.47649	230.914	66.4144
INSR	0.00118704	0.998813	3.44753	3.4686	275.814	79.5102
THBS3	0.00501652	0.994983	3.43986	3.48236	136.838	39.2874
MAP2K6	0.00353847	0.996462	3.43827	3.47468	159.288	45.8353
IDH1	0.000451793	0.999548	3.43635	3.43764	4450.43	1294.61
AKR1C1	0.00924012	0.99076	3.42831	3.48134	109.117	31.3364
STAT2	0.000424515	0.999575	3.42697	3.43219	1091.6	318.041
HMGCS1	0.000421239	0.999579	3.42245	3.42511	2137.02	623.921
TMEM53	0.000605519	0.999394	3.41254	3.42218	585.837	171.181
PGAP3	0.000866465	0.999134	3.40551	3.41937	406.237	118.798
TNRC6C	0.0315797	0.96842	3.39953	3.47931	71.626	20.5791
FTH1P3	0.000708723	0.999291	3.393	3.4033	541.632	159.142
APOBEC3B	0.000826223	0.999174	3.39165	3.40388	455.787	133.895
KNDC1	0.107997	0.892003	3.38377	3.50829	45.9689	13.0958
GATSL3	0.130104	0.869896	3.38051	3.51442	42.7618	12.1604
AK7	0.157806	0.842194	3.37673	3.52156	39.5547	11.225
TTC25	0.192526	0.807474	3.37232	3.53001	36.3475	10.2896
THNSL2	0.00269004	0.99731	3.3673	3.39355	209.533	61.7373
IL1RN	0.0075602	0.99244	3.35799	3.40007	130.423	38.352
LOC102724719	0.953671	0.0463286	3.35474	164.564	1.63564	0
FA2H	0.000693663	0.999306	3.3542	3.36098	798.577	237.595
TNIP3	0.000628008	0.999372	3.35009	3.35409	1349.13	402.228
SLC25A45	0.0335916	0.966408	3.34828	3.42297	73.6679	21.5145
TMEM236	0.897633	0.102367	3.34698	4.77759	5.35592	1.11314
HOXB-AS1	0.4318	0.5682	3.34326	3.58788	23.519	6.5479
LRFN3	0.0495005	0.9505	3.34163	3.42727	64.1427	18.7083
SERPINA6	0.519398	0.480602	3.33061	3.61439	20.3119	5.61249
TOLLIP-AS1	0.519398	0.480602	3.33061	3.61439	20.3119	5.61249
VAC14-AS1	0.519398	0.480602	3.33061	3.61439	20.3119	5.61249
CASP10	0.000805453	0.999195	3.32993	3.33692	761.801	228.288
DHRS4L1	0.754605	0.245395	3.32737	3.84188	11.8878	3.08687
RARA-AS1	0.00365329	0.996347	3.32697	3.35443	194.566	57.9957
SCN9A	0.00660658	0.993393	3.31898	3.35509	147.528	43.9645
HCAR2	0.00541353	0.994586	3.31477	3.34724	163.339	48.7912
RASA4	0.00178193	0.998218	3.31372	3.33024	319.42	95.908
TCTEX1D4	0.613592	0.386408	3.31355	3.65147	17.1047	4.67707
TTLL3	0.0464395	0.95356	3.31295	3.39246	67.553	19.9056
REM2	0.132575	0.867425	3.30625	3.42672	44.8999	13.0958
APOBEC3D	0.286144	0.713856	3.30492	3.48063	31.2482	8.97062
SIRT4	0.0447416	0.955258	3.29902	3.37547	69.4879	20.5791
COL28A1	0.159985	0.840015	3.29734	3.42658	41.6928	12.1604
RAB6C	0.916283	0.0837168	3.29698	5.16347	4.34032	0.832519
BANK1	0.708031	0.291969	3.28929	3.70705	13.8976	3.74166
HOXC4	0.708031	0.291969	3.28929	3.70705	13.8976	3.74166
TRIM7	0.708031	0.291969	3.28929	3.70705	13.8976	3.74166
GRAMD1C	0.0150779	0.984922	3.28219	3.3299	109.043	32.7395
SPATA6L	0.0284698	0.97153	3.28118	3.34299	84.4546	25.2562
PMP2	0.068984	0.931016	3.27934	3.36709	59.8665	17.7729
GOLGA2P5	0.0107649	0.989235	3.27585	3.31647	127.216	38.352
ARSA	0.0011051	0.998895	3.27224	3.27905	748.406	228.232
COL6A4P2	0.955564	0.044436	3.26239	158.15	1.5715	0
TTC21A	0.288426	0.711574	3.2607	3.42598	32.0713	9.35414
VMAC	0.288426	0.711574	3.2607	3.42598	32.0713	9.35414
GPR1-AS	0.913266	0.0867342	3.25938	4.8955	4.61827	0.935414
MSMO1	0.00108119	0.998919	3.25931	3.26146	2340.21	717.528
TSPAN8	0.00107419	0.998926	3.25756	3.2621	1110.74	340.491
KIAA0825	0.847444	0.152556	3.25517	3.99842	8.29579	2.06727
MAP1LC3C	0.0576004	0.9424	3.25291	3.33076	65.9815	19.8027
MTMR9LP	0.1128	0.8872	3.2526	3.35557	50.2451	14.9666
RPRML	0.1128	0.8872	3.2526	3.35557	50.2451	14.9666
ADAM20P1	0.795168	0.204832	3.25208	3.79955	10.6904	2.80624
ADH1C	0.795168	0.204832	3.25208	3.79955	10.6904	2.80624
C2orf66	0.795168	0.204832	3.25208	3.79955	10.6904	2.80624
DLG1-AS1	0.795168	0.204832	3.25208	3.79955	10.6904	2.80624
LOC100240735	0.795168	0.204832	3.25208	3.79955	10.6904	2.80624
NTF4	0.795168	0.204832	3.25208	3.79955	10.6904	2.80624
SEC16B	0.795168	0.204832	3.25208	3.79955	10.6904	2.80624
SULT1E1	0.795168	0.204832	3.25208	3.79955	10.6904	2.80624
NUDT8	0.00311422	0.996886	3.24968	3.26882	262.985	80.4456
CKMT1A	0.428641	0.571359	3.24831	3.46061	25.0798	7.24011
HOXB2	0.00319959	0.9968	3.24759	3.26694	259.778	79.5102
NPM2	0.134641	0.865359	3.24142	3.35071	47.038	14.0312
PPARA	0.0114291	0.988571	3.24	3.27827	131.332	40.0544
EBI3	0.020587	0.979413	3.23965	3.2893	101.559	30.8687
GATS	0.00224487	0.997755	3.2338	3.24742	364.544	112.25
SYT7	0.00270634	0.997294	3.23304	3.24906	310.023	95.4123
ATP2C2	0.00174817	0.998252	3.2325	3.24271	485.346	149.666
NFE2	0.0179569	0.982043	3.22397	3.26917	110.112	33.6749
RIBC1	0.425389	0.574611	3.22229	3.42533	25.6571	7.48331
GCAT	0.0097103	0.99029	3.2202	3.25385	146.972	45.1618
CRAT37	0.861537	0.138463	3.21735	4.00107	7.73989	1.92695
MLLT4-AS1	0.574869	0.425131	3.21535	3.4851	19.5849	5.61249
SUMO1P3	0.780759	0.219241	3.21534	3.70214	11.5243	3.10558
LOC100272216	0.195081	0.804919	3.21418	3.33874	40.6237	12.1604
LOC101927934	0.195081	0.804919	3.21418	3.33874	40.6237	12.1604
NACAP1	0.916007	0.0839935	3.21347	4.81634	4.54344	0.935414
FBXW4	0.00196918	0.998031	3.20528	3.215	499.244	155.279
WARS	0.00218791	0.997812	3.19756	3.19819	7598.77	2375.95
ZNF235	0.236256	0.763744	3.19736	3.33126	37.4166	11.225
ZSCAN1	0.236256	0.763744	3.19736	3.33126	37.4166	11.225
PAPLN	0.00285697	0.997143	3.1964	3.21041	344.714	107.367
PFN4	0.509496	0.490504	3.19565	3.42487	22.4499	6.5479
PDGFD	0.0436953	0.956305	3.19019	3.25182	79.1093	24.3208
ANKRD44	0.868547	0.131453	3.18772	3.98405	7.48331	1.87083
AWAT1	0.868547	0.131453	3.18772	3.98405	7.48331	1.87083
C9orf173-AS1	0.868547	0.131453	3.18772	3.98405	7.48331	1.87083
EYA2	0.868547	0.131453	3.18772	3.98405	7.48331	1.87083
ITGAL	0.868547	0.131453	3.18772	3.98405	7.48331	1.87083
LOC101927755	0.868547	0.131453	3.18772	3.98405	7.48331	1.87083
NYAP1	0.868547	0.131453	3.18772	3.98405	7.48331	1.87083
REEP1	0.868547	0.131453	3.18772	3.98405	7.48331	1.87083
SEPT1	0.868547	0.131453	3.18772	3.98405	7.48331	1.87083
SMAD5-AS1	0.868547	0.131453	3.18772	3.98405	7.48331	1.87083
SPERT	0.868547	0.131453	3.18772	3.98405	7.48331	1.87083
UBE2NL	0.868547	0.131453	3.18772	3.98405	7.48331	1.87083
AOC1	0.0069457	0.993054	3.18513	3.21051	189.221	58.9311
IL17RC	0.00365374	0.996346	3.18133	3.19745	296.125	92.606
PRR29-AS1	0.856813	0.143187	3.17945	3.89133	8.14612	2.08597
FAM171A2	0.0245219	0.975478	3.17929	3.22619	102.628	31.8041
SLC16A13	0.00561855	0.994381	3.1668	3.18766	226.638	71.0915
LOC101927257	0.885039	0.114961	3.16605	4.07678	6.62808	1.61827
UQCRHL	0.885039	0.114961	3.16605	4.07678	6.62808	1.61827
ZNF815P	0.0990227	0.900977	3.16356	3.24686	57.7284	17.7729
CYP4B1	0.600255	0.399745	3.16111	3.42425	19.2428	5.61249
DCLK1	0.600255	0.399745	3.16111	3.42425	19.2428	5.61249
HYAL1	0.600255	0.399745	3.16111	3.42425	19.2428	5.61249
PTPRH	0.00215342	0.997847	3.15295	3.15957	703.432	222.629
SRRM3	0.195587	0.804413	3.1512	3.26358	42.7618	13.0958
PCAT1	0.195954	0.804046	3.14984	3.26207	42.7725	13.1052
FBXO16	0.0510367	0.948963	3.14746	3.20788	78.0403	24.3208
PLXNB1	0.00252905	0.997471	3.14662	3.15515	543.075	172.116
LINC01516	0.957976	0.0420236	3.13927	149.597	1.48597	0
RNF208	0.0073584	0.992642	3.13262	3.15461	209.533	66.4144
KRT20	0.00218368	0.997816	3.12898	3.13206	1479.56	472.384
GAL3ST4	0.61687	0.38313	3.12801	3.38799	18.9755	5.59378
LOC102724312	0.41805	0.58195	3.12616	3.29886	27.7952	8.41873
RNF144B	0.100708	0.899292	3.12124	3.19882	59.8665	18.7083
CD164L2	0.69207	0.30793	3.11453	3.42339	16.0357	4.67707
UCP3	0.69207	0.30793	3.11453	3.42339	16.0357	4.67707
IFI35	0.00261721	0.997383	3.11395	3.12009	735.503	235.724
CLDN3	0.00250657	0.997493	3.11199	3.11406	2170.16	696.884
LOC100288798	0.0217666	0.978233	3.11158	3.14927	120.802	38.352
TMEM163	0.00752593	0.992474	3.10723	3.12752	222.361	71.0915
MOBP	0.878135	0.121865	3.10438	3.87037	7.26951	1.87083
BRSK1	0.195729	0.804271	3.09623	3.19843	44.8999	14.0312
LINC00485	0.051402	0.948598	3.09278	3.14678	83.471	26.519
PLA2G16	0.0035337	0.996466	3.09001	3.09091	4883.4	1579.91
ZSCAN5B	0.923004	0.0769964	3.08886	4.6015	4.34032	0.935414
POU5F1B	0.873118	0.126882	3.08841	3.7991	7.63298	2.00179
C4orf48	0.00289863	0.997101	3.07919	3.08235	1389.76	450.87
LOC647859	0.959137	0.0408634	3.07771	145.321	1.44321	0
C12orf57	0.00295389	0.997046	3.07632	3.07926	1489.18	483.609
NAT14	0.00298429	0.997016	3.07405	3.07725	1367.31	444.322
SRPX2	0.00328107	0.996719	3.06935	3.07115	2416.04	786.683
ECHDC2	0.00313495	0.996865	3.06809	3.07238	1014.52	330.201
IGFLR1	0.0693289	0.930671	3.06199	3.12001	75.9022	24.3208
STAP2	0.77617	0.22383	3.05554	3.43065	12.8606	3.74166
AQP6	0.68802	0.31198	3.05187	3.32891	16.8695	5.06059
SAA4	0.0338979	0.966102	3.05141	3.09164	107.92	34.9003
ACTA1	0.925084	0.0749157	3.04951	4.53365	4.27618	0.935414
AHSG	0.925084	0.0749157	3.04951	4.53365	4.27618	0.935414
C15orf56	0.925084	0.0749157	3.04951	4.53365	4.27618	0.935414
CALCR	0.925084	0.0749157	3.04951	4.53365	4.27618	0.935414
CASC21	0.925084	0.0749157	3.04951	4.53365	4.27618	0.935414
CCNI2	0.925084	0.0749157	3.04951	4.53365	4.27618	0.935414
COLEC10	0.925084	0.0749157	3.04951	4.53365	4.27618	0.935414
CYGB	0.925084	0.0749157	3.04951	4.53365	4.27618	0.935414
DNAJC9-AS1	0.925084	0.0749157	3.04951	4.53365	4.27618	0.935414
HIST2H2AB	0.925084	0.0749157	3.04951	4.53365	4.27618	0.935414
HM13-AS1	0.925084	0.0749157	3.04951	4.53365	4.27618	0.935414
LINC01136	0.925084	0.0749157	3.04951	4.53365	4.27618	0.935414
LIPE-AS1	0.925084	0.0749157	3.04951	4.53365	4.27618	0.935414
LOC101927043	0.925084	0.0749157	3.04951	4.53365	4.27618	0.935414
LOC101927136	0.925084	0.0749157	3.04951	4.53365	4.27618	0.935414
LOC101927248	0.925084	0.0749157	3.04951	4.53365	4.27618	0.935414
LOC101929572	0.925084	0.0749157	3.04951	4.53365	4.27618	0.935414
LOC102724009	0.925084	0.0749157	3.04951	4.53365	4.27618	0.935414
LOC105377590	0.925084	0.0749157	3.04951	4.53365	4.27618	0.935414
LOC388780	0.925084	0.0749157	3.04951	4.53365	4.27618	0.935414
LOC401127	0.925084	0.0749157	3.04951	4.53365	4.27618	0.935414
MAFA	0.925084	0.0749157	3.04951	4.53365	4.27618	0.935414
NEBL-AS1	0.925084	0.0749157	3.04951	4.53365	4.27618	0.935414
P2RX6	0.925084	0.0749157	3.04951	4.53365	4.27618	0.935414
PRDM12	0.925084	0.0749157	3.04951	4.53365	4.27618	0.935414
SEC14L5	0.925084	0.0749157	3.04951	4.53365	4.27618	0.935414
SMTNL2	0.925084	0.0749157	3.04951	4.53365	4.27618	0.935414
TIAM2	0.925084	0.0749157	3.04951	4.53365	4.27618	0.935414
TRIM29	0.925084	0.0749157	3.04951	4.53365	4.27618	0.935414
YPEL4	0.925084	0.0749157	3.04951	4.53365	4.27618	0.935414
AZIN2	0.778063	0.221937	3.04831	3.4221	12.8285	3.74166
EPHA1-AS1	0.778063	0.221937	3.04831	3.4221	12.8285	3.74166
LOC100130691	0.778063	0.221937	3.04831	3.4221	12.8285	3.74166
RCAN2	0.778063	0.221937	3.04831	3.4221	12.8285	3.74166
ZNF792	0.778063	0.221937	3.04831	3.4221	12.8285	3.74166
GCGR	0.5859	0.4141	3.04804	3.26185	21.3809	6.5479
L3MBTL1	0.410218	0.589782	3.04793	3.19765	29.9333	9.35414
PIGZ	0.410218	0.589782	3.04793	3.19765	29.9333	9.35414
SH3GL1P2	0.959705	0.0402946	3.04693	143.183	1.42183	0
LPIN1	0.00365744	0.996343	3.04449	3.04934	881.438	289.052
LHPP	0.00793309	0.992067	3.04359	3.05967	266.192	86.9935
IFI44	0.0036881	0.996312	3.03904	3.04163	1638.85	538.799
ARHGEF37	0.056492	0.943508	3.03533	3.08497	86.5926	28.0624
PAEP	0.00504604	0.994954	3.03155	3.04056	469.311	154.343
LOC100129940	0.959987	0.0400129	3.03154	142.114	1.41114	0
ADAMTS13	0.120546	0.879454	3.03025	3.10097	60.9356	19.6437
LOC100505938	0.120546	0.879454	3.03025	3.10097	60.9356	19.6437
THRB	0.0113311	0.988669	3.02754	3.04733	213.809	70.1561
ZDHHC1	0.165028	0.834972	3.02747	3.10986	52.3832	16.8375
FOXA2	0.0805912	0.919409	3.01925	3.07607	74.8331	24.3208
TLE2	0.0396095	0.960391	3.01743	3.05732	105.835	34.6103
MXD4	0.00413576	0.995864	3.01717	3.02075	1164.19	385.391
SLC25A29	0.00420563	0.995794	3.01586	3.01848	1589.67	526.638
ABCC6P2	0.584137	0.415863	3.01212	3.21301	22.0223	6.84723
TRAF5	0.00761622	0.992384	3.01081	3.02383	319.644	105.702
HEXIM2	0.00963253	0.990367	3.01028	3.02645	257.64	85.1227
RBM14-RBM4	0.687772	0.312228	3.01011	3.26909	17.3613	5.3038
AKR1A1	0.00495281	0.995047	3.00924	3.01059	3072.44	1020.54
CDKL3	0.487351	0.512649	3.00886	3.17202	26.7261	8.41873
FAM229A	0.487351	0.512649	3.00886	3.17202	26.7261	8.41873
MMP13	0.487351	0.512649	3.00886	3.17202	26.7261	8.41873
TRIM31	0.00434312	0.995657	3.00837	3.01175	1228.33	407.841
MPND	0.00481348	0.995187	3.00683	3.0129	682.051	226.37
FAM231D	0.0723605	0.927639	3.00678	3.05921	80.1463	26.1916
ENTPD3	0.195235	0.804765	3.00486	3.09112	49.1761	15.902
ANKRD65	0.233143	0.766857	2.99863	3.09281	44.9213	14.5176
GLYATL1	0.00712061	0.992879	2.99849	3.00965	368.821	122.539
INPP5J	0.278264	0.721736	2.99616	3.10044	40.6237	13.0958
LOC401052	0.669677	0.330323	2.99546	3.23604	18.3662	5.66861
CORO2A	0.00516652	0.994833	2.99509	3.00122	668.431	222.713
LGALS8-AS1	0.674961	0.325039	2.99161	3.23411	18.1738	5.61249
TOB2P1	0.674961	0.325039	2.99161	3.23411	18.1738	5.61249
SGPP2	0.00972096	0.990279	2.98155	2.99563	288.642	96.3477
C2orf82	0.0934847	0.906515	2.97652	3.03213	73.7641	24.3208
RNPEPL1	0.00523832	0.994762	2.97569	2.97884	1281.78	430.291
CD99P1	0.331791	0.668209	2.9647	3.07522	37.4166	12.1604
LMNTD2	0.331791	0.668209	2.9647	3.07522	37.4166	12.1604
ACADS	0.00748493	0.992515	2.96365	2.97274	439.377	147.795
C6orf1	0.0181284	0.981872	2.96331	2.98476	187.083	62.6728
SEPT5	0.447707	0.552293	2.96244	3.1016	29.9333	9.64412
TMEM238	0.0085251	0.991475	2.96219	2.97299	369.89	124.41
AGPAT3	0.00586867	0.994131	2.96191	2.96674	824.234	277.818
CYB5R2	0.571169	0.428831	2.96085	3.14	23.519	7.48331
ABCA7	0.00580854	0.994191	2.9579	2.96089	1326.68	448.063
FBXO6	0.220481	0.779519	2.95606	3.04007	48.4491	15.9301
DBP	0.0673424	0.932658	2.95464	2.99933	89.7998	29.9333
LOC101927587	0.961368	0.0386318	2.95458	136.769	1.35769	0
CORO1B	0.00668671	0.993313	2.95443	2.95584	2800.9	947.575
CFI	0.00648829	0.993512	2.95366	2.95528	2429.94	822.229
ALKBH7	0.0063044	0.993696	2.94855	2.95325	837.062	283.431
KANSL1-AS1	0.85195	0.14805	2.94671	3.41995	9.6214	2.80624
KISS1	0.85195	0.14805	2.94671	3.41995	9.6214	2.80624
MTTP	0.85195	0.14805	2.94671	3.41995	9.6214	2.80624
NCCRP1	0.85195	0.14805	2.94671	3.41995	9.6214	2.80624
PPP1R32	0.85195	0.14805	2.94671	3.41995	9.6214	2.80624
SGMS1-AS1	0.85195	0.14805	2.94671	3.41995	9.6214	2.80624
TAF7L	0.85195	0.14805	2.94671	3.41995	9.6214	2.80624
MTUS1	0.00644296	0.993557	2.94317	2.94553	1655.95	562.184
APOBEC3F	0.0532372	0.946763	2.94262	2.98089	103.58	34.7413
LINC01023	0.475977	0.524023	2.94154	3.08349	28.8642	9.35414
ERICH2	0.0299235	0.970077	2.93934	2.96663	144.321	48.6415
RAB40A	0.961639	0.038361	2.93919	135.7	1.347	0
ICOSLG	0.0119317	0.988068	2.92601	2.93859	307.885	104.766
TMPRSS13	0.00813355	0.991866	2.91555	2.92165	628.598	215.145
LINC01232	0.759613	0.240387	2.91552	3.19531	14.9666	4.67707
LINC01273	0.759613	0.240387	2.91552	3.19531	14.9666	4.67707
LOC100420587	0.759613	0.240387	2.91552	3.19531	14.9666	4.67707
NEURL2	0.271836	0.728164	2.91129	2.99866	44.8999	14.9666
SMIM6	0.271836	0.728164	2.91129	2.99866	44.8999	14.9666
WBP1	0.00765301	0.992347	2.90942	2.91265	1177.02	404.099
DYDC1	0.962175	0.0378246	2.90841	133.562	1.32562	0
ZNF821	0.0305868	0.969413	2.90253	2.92696	156.081	53.3186
PARP10	0.008036	0.991964	2.90088	2.90415	1154.57	397.551
ZNF524	0.010777	0.989223	2.90049	2.90964	413.72	142.183
TEX14	0.657431	0.342569	2.90044	3.09884	20.3119	6.5479
HSD11B1L	0.165454	0.834546	2.89701	2.96009	60.9356	20.5791
IRF2BPL	0.00892391	0.991076	2.89668	2.90249	648.91	223.564
APH1B	0.556438	0.443562	2.89155	3.04519	25.6571	8.41873
DET1	0.46472	0.53528	2.88569	3.01103	31.0023	10.2896
MRGPRX3	0.90224	0.09776	2.88189	3.58437	6.56394	1.82406
THBS2	0.0196825	0.980317	2.88077	2.89677	233.052	80.4456
CCDC88B	0.0192343	0.980766	2.88024	2.89587	238.397	82.3165
OSER1-AS1	0.0482717	0.951728	2.87592	2.90576	125.078	43.0384
LTB	0.192514	0.807486	2.87256	2.93779	57.7284	19.6437
TBX15	0.165324	0.834676	2.87126	2.93078	63.0737	21.5145
PVRL4	0.0200386	0.979961	2.86713	2.88232	242.673	84.1873
RAB42	0.901815	0.0981847	2.86686	3.54639	6.66015	1.87083
TTC39B	0.0431998	0.9568	2.86362	2.89036	137.907	47.7061
OTUB2	0.0112223	0.988778	2.8629	2.86434	2545.4	888.644
ANXA2P2	0.962967	0.0370331	2.86224	130.354	1.29354	0
SAMD12	0.0305142	0.969486	2.86224	2.88321	175.323	60.8019
TRAPPC9	0.0373412	0.962659	2.85312	2.8765	156.081	54.254
GBP4	0.134305	0.865695	2.8521	2.9026	72.8661	25.0972
MAN2B2	0.0144304	0.98557	2.8516	2.86095	388.063	135.635
CCDC28B	0.0808758	0.919124	2.85071	2.88833	97.2831	33.6749
POU2AF1	0.779243	0.220757	2.84984	3.12004	14.6138	4.67707
FGFBP1	0.0109068	0.989093	2.84846	2.85124	1298.89	455.547
MINOS1-NBL1	0.71209	0.28791	2.84726	3.05848	18.302	5.9773
PIK3R1	0.016387	0.983613	2.84626	2.85699	336.749	117.862
CDRT4	0.0122172	0.987783	2.84614	2.85241	575.146	201.629
LOC440446	0.750501	0.249499	2.84341	3.08217	16.2816	5.27574
TMEM120A	0.0125585	0.987441	2.84253	2.84892	562.318	197.372
EGF	0.378317	0.621683	2.84112	2.9373	38.4856	13.0958
LOC100130950	0.378317	0.621683	2.84112	2.9373	38.4856	13.0958
DNASE1L2	0.453711	0.546289	2.83861	2.95064	33.1404	11.225
NATD1	0.453494	0.546506	2.83774	2.94954	33.1832	11.2437
PLGLB1	0.737092	0.262908	2.83725	3.06246	17.094	5.57507
XKR9	0.0987047	0.901295	2.83696	2.87764	88.9552	30.9061
RASA4CP	0.574726	0.425274	2.83476	2.97898	25.935	8.69935
GDPD1	0.047779	0.952221	2.83423	2.86006	139.029	48.6041
TYMP	0.0122255	0.987774	2.83054	2.83484	825.164	291.073
CYSRT1	0.639896	0.360104	2.83012	2.99733	22.4499	7.48331
LOC101929331	0.639896	0.360104	2.83012	2.99733	22.4499	7.48331
ACCS	0.126515	0.873485	2.82999	2.87616	78.0403	27.127
AMY2B	0.126515	0.873485	2.82999	2.87616	78.0403	27.127
IFI27L1	0.0551855	0.944815	2.82885	2.85673	128.285	44.8999
CRACR2B	0.0279978	0.972002	2.82591	2.84261	212.74	74.8331
ACRC	0.164899	0.835101	2.82577	2.8792	67.3498	23.3854
DUSP19	0.739985	0.260015	2.8238	3.04588	17.1154	5.61249
TMC5	0.0137011	0.986299	2.82221	2.82385	2143.02	758.892
LINC00884	0.740591	0.259409	2.82211	3.04398	17.1047	5.61249
MYO3B	0.740591	0.259409	2.82211	3.04398	17.1047	5.61249
LOC101929660	0.963743	0.0362571	2.81607	127.147	1.26147	0
TUBA3FP	0.90398	0.0960204	2.81582	3.45454	6.7136	1.93631
LOC100288152	0.0189068	0.981093	2.81568	2.82598	341.025	120.668
SHC3	0.0471192	0.952881	2.8127	2.83638	148.597	52.3832
CLDN10-AS1	0.310872	0.689128	2.81162	2.88957	45.9689	15.902
ALDH6A1	0.0144917	0.985508	2.80881	2.81427	638.69	226.941
MUC13	0.0160972	0.983903	2.80868	2.81599	476.794	169.31
CRIP3	0.833861	0.166139	2.80734	3.13715	11.7595	3.74166
DLG3-AS1	0.833861	0.166139	2.80734	3.13715	11.7595	3.74166
FAM167B	0.833861	0.166139	2.80734	3.13715	11.7595	3.74166
MORN3	0.833861	0.166139	2.80734	3.13715	11.7595	3.74166
RLN1	0.833861	0.166139	2.80734	3.13715	11.7595	3.74166
SSR4P1	0.833861	0.166139	2.80734	3.13715	11.7595	3.74166
ZBP1	0.833861	0.166139	2.80734	3.13715	11.7595	3.74166
KCNB2	0.370733	0.629267	2.80584	2.89389	40.6237	14.0312
RHPN1	0.0138914	0.986109	2.80522	2.80862	1022.01	363.876
ZBTB42	0.0274341	0.972566	2.80416	2.81883	237.328	84.1873
BLVRA	0.0142757	0.985724	2.80262	2.80677	834.924	297.462
SYCE1L	0.189842	0.810158	2.80141	2.85632	64.1427	22.4499
TNFRSF10C	0.216716	0.783284	2.80122	2.8609	59.1075	20.6539
ADGRG1	0.0143662	0.985634	2.79942	2.80249	1124.64	401.293
GUCY1A3	0.0296062	0.970394	2.79584	2.81094	228.776	81.381
FGB	0.0175395	0.98246	2.78564	2.78704	2440.73	875.735
FADS6	0.964252	0.0357482	2.78529	125.009	1.24009	0
SLC4A11	0.0852132	0.914787	2.78304	2.81486	107.974	38.352
NAPSA	0.0217253	0.978275	2.78253	2.78327	4592.62	1650.07
KCNJ11	0.789925	0.210075	2.78085	3.03099	14.7635	4.86415
XCL1	0.0530037	0.946996	2.78081	2.80367	149.506	53.3186
MUC16	0.0197781	0.980222	2.78058	2.78159	3346.11	1202.94
DRAM1	0.0166084	0.983392	2.77547	2.77948	842.407	303.074
FGA	0.0634533	0.936547	2.77527	2.80074	133.631	47.7061
LOC101929767	0.363403	0.636597	2.77477	2.8559	42.7618	14.9666
TNNI3	0.363403	0.636597	2.77477	2.8559	42.7618	14.9666
ARHGAP4	0.622608	0.377392	2.77424	2.91836	24.588	8.41873
LINC00920	0.622608	0.377392	2.77424	2.91836	24.588	8.41873
ZNF503-AS2	0.622608	0.377392	2.77424	2.91836	24.588	8.41873
ARHGEF38-IT1	0.909977	0.0900234	2.77101	3.41566	6.41427	1.87083
GACAT2	0.909977	0.0900234	2.77101	3.41566	6.41427	1.87083
GPR162	0.909977	0.0900234	2.77101	3.41566	6.41427	1.87083
LINC00202-1	0.909977	0.0900234	2.77101	3.41566	6.41427	1.87083
LINC00243	0.909977	0.0900234	2.77101	3.41566	6.41427	1.87083
LINC00865	0.909977	0.0900234	2.77101	3.41566	6.41427	1.87083
LINC01272	0.909977	0.0900234	2.77101	3.41566	6.41427	1.87083
LOC283575	0.909977	0.0900234	2.77101	3.41566	6.41427	1.87083
MMEL1	0.909977	0.0900234	2.77101	3.41566	6.41427	1.87083
MRAS	0.909977	0.0900234	2.77101	3.41566	6.41427	1.87083
TNFAIP8L3	0.909977	0.0900234	2.77101	3.41566	6.41427	1.87083
EPN3	0.0172286	0.982771	2.77057	2.7749	776.127	279.689
MFSD6	0.0368561	0.963144	2.76929	2.78548	208.464	74.8331
DLG3	0.0188733	0.981127	2.76422	2.76593	1945.66	703.432
FAM63A	0.0571208	0.942879	2.76399	2.78663	148.597	53.3186
SLC1A4	0.432724	0.567276	2.7636	2.85573	37.4166	13.0958
LSS	0.0192175	0.980782	2.75927	2.76108	1844.1	667.886
LPAL2	0.629893	0.370107	2.7592	2.90177	24.5025	8.43744
PBXIP1	0.0181628	0.981837	2.75811	2.76137	1017.73	368.553
TST	0.0189833	0.981017	2.75626	2.75839	1553.32	563.119
ASS1	0.0210877	0.978912	2.7545	2.75586	2443.84	886.773
NUTM2A	0.608316	0.391684	2.75163	2.88475	25.9778	8.99869
PCDHB7	0.911004	0.0889957	2.75095	3.38202	6.41427	1.88954
HLA-B	0.0284337	0.971566	2.74831	2.74891	5495.29	1999.07
LINC00958	0.722826	0.277174	2.74721	2.92909	19.2535	6.56661
DKK3	0.0956436	0.904356	2.74466	2.77506	109.043	39.2874
HIST1H1C	0.0202201	0.97978	2.74235	2.74667	757.953	275.947
IL17RE	0.0665433	0.933457	2.74014	2.76329	142.183	51.4478
PPP1R12B	0.0309592	0.969041	2.73972	2.75098	290.802	105.702
NUTM2D	0.965003	0.0349974	2.73912	121.802	1.20802	0
AHCYL2	0.020598	0.979402	2.73741	2.74138	823.165	300.268
PCDHA11	0.324399	0.675601	2.73554	2.8035	49.005	17.4735
LINC00663	0.149088	0.850912	2.73442	2.77395	83.3107	30.0268
NAGLU	0.0211551	0.978845	2.73154	2.7351	910.826	333.008
RHOB	0.0215255	0.978475	2.73141	2.73575	747.262	273.141
TPGS1	0.0267144	0.973286	2.73132	2.73971	386.994	141.248
STK32A	0.0343921	0.965608	2.73062	2.74268	269.399	98.2185
ZSWIM5	0.18614	0.81386	2.72964	2.77483	72.6951	26.1916
STEAP2	0.021595	0.978405	2.72848	2.73226	853.654	312.428
ZBTB46	0.105668	0.894332	2.72828	2.75912	105.835	38.352
PCSK1N	0.0220477	0.977952	2.72689	2.73117	753.677	275.947
AKR1D1	0.96525	0.0347504	2.72373	120.733	1.19733	0
LOC101060542	0.934967	0.0650329	2.72153	3.75371	4.27618	1.13185
FAM122C	0.180073	0.819927	2.71865	2.76155	75.7311	27.417
MAPK8IP2	0.0434234	0.956577	2.71769	2.73214	222.361	81.381
FLJ37035	0.815013	0.184987	2.7165	2.96722	13.8976	4.67707
LOC554206	0.815013	0.184987	2.7165	2.96722	13.8976	4.67707
SMIM5	0.815013	0.184987	2.7165	2.96722	13.8976	4.67707
EXD3	0.0325605	0.96744	2.71612	2.72621	317.56	116.478
FAM20A	0.0286342	0.971366	2.71437	2.72236	399.823	146.86
MAGED1	0.0262342	0.973766	2.71299	2.71443	2206.51	812.875
MTHFR	0.0621766	0.937823	2.71025	2.72967	164.633	60.3062
IGFBP4	0.0242881	0.975712	2.70705	2.71008	1044.46	385.391
KRT15	0.0257897	0.97421	2.70331	2.70536	1543.7	570.603
TSPAN31	0.0388219	0.961178	2.70213	2.70265	6069.93	2245.91
C8orf82	0.0347467	0.965253	2.70199	2.71187	319.644	117.862
TAPT1-AS1	0.702379	0.297621	2.6994	2.85466	21.3809	7.48331
LOC100128233	0.915385	0.0846153	2.69867	3.31392	6.25391	1.88018
DPH3P1	0.829193	0.170807	2.69375	2.9536	13.1706	4.45257
ZFPM2-AS1	0.244488	0.755512	2.69258	2.74211	64.1427	23.3854
S1PR2	0.0346039	0.965396	2.69221	2.70122	347.472	128.629
PRR5L	0.0389297	0.96107	2.69218	2.70295	290.78	107.573
TMEM219	0.0265164	0.973484	2.69192	2.69478	1091.49	405.034
AZGP1P1	0.589351	0.410649	2.69104	2.80344	28.8642	10.2896
ELOVL4	0.589351	0.410649	2.69104	2.80344	28.8642	10.2896
SLC45A4	0.0714976	0.928502	2.68944	2.70938	157.15	57.9957
SELM	0.0620543	0.937946	2.68659	2.70397	179.6	66.4144
DISP2	0.488353	0.511647	2.68608	2.77416	36.3475	13.0958
TMEM86A	0.488353	0.511647	2.68608	2.77416	36.3475	13.0958
C8orf31	0.404662	0.595338	2.68193	2.75425	43.8415	15.9114
STRA6	0.044608	0.955392	2.68031	2.69213	261.916	97.2831
ABCG2	0.0999448	0.900055	2.68008	2.70517	124.009	45.8353
PON3	0.283674	0.716326	2.67872	2.73211	58.7975	21.5145
ARL11	0.241581	0.758419	2.6778	2.72501	66.2915	24.3208
RND1	0.0699159	0.930084	2.67083	2.68881	171.047	63.6082
CCDC74B	0.827748	0.172252	2.66942	2.91523	13.5448	4.63966
RAB4B	0.0508363	0.949164	2.66894	2.6818	238.333	88.8644
BATF3	0.0301759	0.969824	2.66859	2.67212	864.857	323.653
C11orf85	0.0940144	0.905986	2.66494	2.6875	135.769	50.5124
LINC00337	0.89114	0.10886	2.66272	3.06692	8.62719	2.80624
OR2A7	0.966221	0.0337786	2.66217	116.457	1.15457	0
ECH1	0.0419835	0.958016	2.66066	2.66145	3823.97	1436.8
DDO	0.476272	0.523728	2.66065	2.74162	38.4856	14.0312
SLC2A10	0.573544	0.426456	2.65923	2.76034	31.0023	11.225
ISG20	0.0332837	0.966716	2.65502	2.65952	669.222	251.626
LOC285628	0.0388745	0.961125	2.6543	2.66182	400.892	150.602
CHRNA10	0.795785	0.204215	2.65261	2.85384	16.0357	5.61249
EPB41L4A	0.795785	0.204215	2.65261	2.85384	16.0357	5.61249
TBX6	0.795785	0.204215	2.65261	2.85384	16.0357	5.61249
TUBA1A	0.0336629	0.966337	2.65082	2.65338	1169.81	440.87
HDAC5	0.0385227	0.961477	2.64889	2.65574	437.239	164.633
SLC2A3	0.797277	0.202723	2.64753	2.84814	16.0036	5.61249
FLRT3	0.102584	0.897416	2.64406	2.66634	134.7	50.5124
RABGAP1L	0.0409459	0.959054	2.64388	2.6513	401.961	151.603
BCL2L10	0.893626	0.106374	2.64134	3.04035	8.55236	2.80624
C11orf63	0.893626	0.106374	2.64134	3.04035	8.55236	2.80624
CLEC2B	0.893626	0.106374	2.64134	3.04035	8.55236	2.80624
COLQ	0.893626	0.106374	2.64134	3.04035	8.55236	2.80624
CRIP1	0.893626	0.106374	2.64134	3.04035	8.55236	2.80624
DNAH7	0.893626	0.106374	2.64134	3.04035	8.55236	2.80624
FHAD1	0.893626	0.106374	2.64134	3.04035	8.55236	2.80624
LOC389247	0.893626	0.106374	2.64134	3.04035	8.55236	2.80624
SLC43A1	0.893626	0.106374	2.64134	3.04035	8.55236	2.80624
TRIL	0.893626	0.106374	2.64134	3.04035	8.55236	2.80624
TTC9B	0.893626	0.106374	2.64134	3.04035	8.55236	2.80624
PLEKHB1	0.037606	0.962394	2.64023	2.64571	542.006	204.856
CASZ1	0.203077	0.796923	2.62999	2.66613	82.3165	30.8687
FN3K	0.203077	0.796923	2.62999	2.66613	82.3165	30.8687
LUADT1	0.895866	0.104134	2.62883	3.02877	8.43476	2.77818
BLOC1S1	0.0402729	0.959727	2.62753	2.62934	1618.88	615.69
FGF1	0.379466	0.620534	2.62537	2.68481	50.2451	18.7083
SLPI	0.0425541	0.957446	2.62442	2.62593	1930.7	735.236
ERV3-1	0.0547796	0.94522	2.62346	2.63372	285.328	108.33
C5AR1	0.665306	0.334694	2.62238	2.741	25.6571	9.35414
FAR2	0.665306	0.334694	2.62238	2.741	25.6571	9.35414
DNASE1	0.0912057	0.908794	2.62065	2.63879	161.447	61.1761
ATP1B4	0.70179	0.29821	2.61503	2.74534	23.2838	8.47485
ADAMTSL5	0.104964	0.895036	2.61407	2.63409	145.39	55.1894
CCDC130	0.0539661	0.946034	2.61308	2.62224	316.437	120.668
SAA1	0.0734979	0.926502	2.61262	2.61297	8191.65	3134.99
MST1	0.773899	0.226101	2.6126	2.78095	18.2272	6.5479
IRF7	0.0413089	0.958691	2.61258	2.61621	795.369	304.01
EYA1	0.265522	0.734478	2.61035	2.65243	69.4879	26.1916
ATF7IP2	0.371965	0.628035	2.60974	2.66582	52.3832	19.6437
SLC50A1	0.0468553	0.953145	2.6094	2.61083	2012.03	770.641
ZNF582-AS1	0.543759	0.456241	2.60856	2.69259	35.2785	13.0958
CYBA	0.0853038	0.914696	2.60711	2.60737	11031.5	4230.88
FEZ1	0.776427	0.223573	2.60522	2.7728	18.1738	6.5479
FRY	0.776427	0.223573	2.60522	2.7728	18.1738	6.5479
LOC101927305	0.776427	0.223573	2.60522	2.7728	18.1738	6.5479
PPM1N	0.776427	0.223573	2.60522	2.7728	18.1738	6.5479
LINC00963	0.049147	0.950853	2.60488	2.61174	417.804	159.965
XDH	0.0546792	0.945321	2.60468	2.61332	332.473	127.216
ATP8B3	0.309658	0.690342	2.60379	2.65072	62.0046	23.3854
SCAND1	0.0559906	0.944009	2.60365	2.6045	3345.04	1284.32
DNALI1	0.105857	0.894143	2.60343	2.62267	149.666	57.0603
HLA-F	0.0531035	0.946896	2.602	2.60992	361.337	138.441
SLC38A6	0.0710937	0.928906	2.60133	2.6138	229.845	87.9289
HERC5	0.106293	0.893707	2.59837	2.61723	151.804	57.9957
MAGED2	0.0458496	0.95415	2.59624	2.59866	1171.67	450.87
SYNE4	0.0468887	0.953111	2.59325	2.59774	631.806	243.208
SEMA3A	0.0492465	0.950754	2.59137	2.59683	517.418	199.243
ARMC3	0.529802	0.470198	2.58805	2.66548	37.4166	14.0312
NAALADL2	0.529802	0.470198	2.58805	2.66548	37.4166	14.0312
ADGRE4P	0.919094	0.0809061	2.58656	3.11182	6.42496	2.05791
FUT5	0.9674	0.0325997	2.58521	111.112	1.10112	0
H2AFB1	0.9674	0.0325997	2.58521	111.112	1.10112	0
H2AFB3	0.9674	0.0325997	2.58521	111.112	1.10112	0
NEU1	0.0511113	0.948889	2.58464	2.58644	1562.94	604.278
ZNF32	0.0843725	0.915628	2.58463	2.59844	204.188	78.5748
PPM1K	0.0821989	0.917801	2.58284	2.59608	212.526	81.8581
IGFBP2	0.0657354	0.934265	2.57968	2.58046	3584.51	1389.09
AIFM2	0.10797	0.89203	2.57963	2.59714	160.357	61.7373
RALGPS1	0.222345	0.777655	2.57875	2.61175	85.5236	32.7395
GBP2	0.0523062	0.947694	2.57643	2.57847	1365.17	529.445
ACSL5	0.0538666	0.946133	2.5754	2.58092	504.589	195.502
RAMP1	0.0711636	0.928836	2.57311	2.57379	4059.16	1577.11
ASIC1	0.11551	0.88449	2.57106	2.58902	155.012	59.8665
GPR173	0.967631	0.0323686	2.56982	110.043	1.09043	0
CD99L2	0.0547221	0.945278	2.56653	2.5687	1271.09	494.834
AMOT	0.87647	0.12353	2.56636	2.85219	10.6904	3.74166
AQP7P3	0.87647	0.12353	2.56636	2.85219	10.6904	3.74166
EYS	0.87647	0.12353	2.56636	2.85219	10.6904	3.74166
LOC100507564	0.87647	0.12353	2.56636	2.85219	10.6904	3.74166
LOC375196	0.87647	0.12353	2.56636	2.85219	10.6904	3.74166
RAD51-AS1	0.87647	0.12353	2.56636	2.85219	10.6904	3.74166
SPARCL1	0.87647	0.12353	2.56636	2.85219	10.6904	3.74166
XKRX	0.87647	0.12353	2.56636	2.85219	10.6904	3.74166
LINC00638	0.632078	0.367922	2.56551	2.66075	29.9333	11.2437
GSDMC	0.0653086	0.934691	2.56466	2.57267	344.243	133.802
TMEM173	0.0544733	0.945527	2.56283	2.56663	722.674	281.56
ARTN	0.116181	0.883819	2.56251	2.57983	159.288	61.7373
DNAJC4	0.0596926	0.940307	2.56212	2.56827	446.861	173.987
D2HGDH	0.0551679	0.944832	2.56205	2.56454	1101.12	429.355
TNFRSF1B	0.115564	0.884436	2.5606	2.57767	161.372	62.5979
SYK	0.0578933	0.942107	2.55795	2.56293	549.5	214.397
MST1L	0.877928	0.122072	2.55672	2.84079	10.6477	3.74166
LOC100128006	0.919428	0.0805717	2.55502	3.0497	6.55325	2.1421
RPEL1	0.967861	0.032139	2.55443	108.974	1.07974	0
SPRR2G	0.967861	0.032139	2.55443	108.974	1.07974	0
PCCA	0.105507	0.894493	2.54935	2.56389	187.083	72.9623
IL22RA1	0.613571	0.386429	2.54889	2.63602	32.0713	12.1604
C21orf2	0.0674317	0.932568	2.54832	2.55535	384.856	150.602
LINC01089	0.245817	0.754183	2.54677	2.57911	84.4546	32.7395
EVA1B	0.0702838	0.929716	2.54646	2.55406	355.992	139.377
PCDHA4	0.113352	0.886648	2.54561	2.56106	175.473	68.5097
LRRC27	0.16271	0.83729	2.54388	2.56596	122.812	47.8558
MAB21L3	0.227933	0.772067	2.54131	2.57099	91.4033	35.5457
TMEM63C	0.491591	0.508409	2.53966	2.60222	43.8308	16.8375
A2M-AS1	0.968089	0.031911	2.53904	107.904	1.06904	0
ABCG1	0.968089	0.031911	2.53904	107.904	1.06904	0
ABO	0.968089	0.031911	2.53904	107.904	1.06904	0
ACRV1	0.968089	0.031911	2.53904	107.904	1.06904	0
ACTL8	0.968089	0.031911	2.53904	107.904	1.06904	0
ADAMTS7	0.968089	0.031911	2.53904	107.904	1.06904	0
ADAMTS7P1	0.968089	0.031911	2.53904	107.904	1.06904	0
ADCY1	0.968089	0.031911	2.53904	107.904	1.06904	0
ADD3-AS1	0.968089	0.031911	2.53904	107.904	1.06904	0
ADGRG7	0.968089	0.031911	2.53904	107.904	1.06904	0
ADH7	0.968089	0.031911	2.53904	107.904	1.06904	0
ADORA2A-AS1	0.968089	0.031911	2.53904	107.904	1.06904	0
ADORA3	0.968089	0.031911	2.53904	107.904	1.06904	0
ADPGK-AS1	0.968089	0.031911	2.53904	107.904	1.06904	0
AFP	0.968089	0.031911	2.53904	107.904	1.06904	0
AGBL2	0.968089	0.031911	2.53904	107.904	1.06904	0
ALDH3A1	0.968089	0.031911	2.53904	107.904	1.06904	0
ANGPTL8	0.968089	0.031911	2.53904	107.904	1.06904	0
ANKRD20A8P	0.968089	0.031911	2.53904	107.904	1.06904	0
ANO1	0.968089	0.031911	2.53904	107.904	1.06904	0
AOAH-IT1	0.968089	0.031911	2.53904	107.904	1.06904	0
APOA1	0.968089	0.031911	2.53904	107.904	1.06904	0
APOBEC3H	0.968089	0.031911	2.53904	107.904	1.06904	0
APOF	0.968089	0.031911	2.53904	107.904	1.06904	0
AQP7	0.968089	0.031911	2.53904	107.904	1.06904	0
ARL13A	0.968089	0.031911	2.53904	107.904	1.06904	0
ARMC12	0.968089	0.031911	2.53904	107.904	1.06904	0
ARSF	0.968089	0.031911	2.53904	107.904	1.06904	0
ATOH7	0.968089	0.031911	2.53904	107.904	1.06904	0
ATP12A	0.968089	0.031911	2.53904	107.904	1.06904	0
B3GALT5-AS1	0.968089	0.031911	2.53904	107.904	1.06904	0
BEND3P3	0.968089	0.031911	2.53904	107.904	1.06904	0
BEND5	0.968089	0.031911	2.53904	107.904	1.06904	0
BEX5	0.968089	0.031911	2.53904	107.904	1.06904	0
BGN	0.968089	0.031911	2.53904	107.904	1.06904	0
BMPR1B-AS1	0.968089	0.031911	2.53904	107.904	1.06904	0
BMX	0.968089	0.031911	2.53904	107.904	1.06904	0
BPIFA2	0.968089	0.031911	2.53904	107.904	1.06904	0
BZRAP1-AS1	0.968089	0.031911	2.53904	107.904	1.06904	0
C17orf50	0.968089	0.031911	2.53904	107.904	1.06904	0
C1orf204	0.968089	0.031911	2.53904	107.904	1.06904	0
C1QTNF5	0.968089	0.031911	2.53904	107.904	1.06904	0
C20orf195	0.968089	0.031911	2.53904	107.904	1.06904	0
C21orf62-AS1	0.968089	0.031911	2.53904	107.904	1.06904	0
C4orf22	0.968089	0.031911	2.53904	107.904	1.06904	0
C5orf60	0.968089	0.031911	2.53904	107.904	1.06904	0
C5orf64	0.968089	0.031911	2.53904	107.904	1.06904	0
C5orf67	0.968089	0.031911	2.53904	107.904	1.06904	0
CACNA1S	0.968089	0.031911	2.53904	107.904	1.06904	0
CALCRL	0.968089	0.031911	2.53904	107.904	1.06904	0
CAND2	0.968089	0.031911	2.53904	107.904	1.06904	0
CASP5	0.968089	0.031911	2.53904	107.904	1.06904	0
CCDC13	0.968089	0.031911	2.53904	107.904	1.06904	0
CCDC144NL-AS1	0.968089	0.031911	2.53904	107.904	1.06904	0
CCDC8	0.968089	0.031911	2.53904	107.904	1.06904	0
CCDC83	0.968089	0.031911	2.53904	107.904	1.06904	0
CCL17	0.968089	0.031911	2.53904	107.904	1.06904	0
CCND2-AS1	0.968089	0.031911	2.53904	107.904	1.06904	0
CD163	0.968089	0.031911	2.53904	107.904	1.06904	0
CD27	0.968089	0.031911	2.53904	107.904	1.06904	0
CD300A	0.968089	0.031911	2.53904	107.904	1.06904	0
CD34	0.968089	0.031911	2.53904	107.904	1.06904	0
CD3D	0.968089	0.031911	2.53904	107.904	1.06904	0
CDC20B	0.968089	0.031911	2.53904	107.904	1.06904	0
CDKL5	0.968089	0.031911	2.53904	107.904	1.06904	0
CDRT15L2	0.968089	0.031911	2.53904	107.904	1.06904	0
CECR6	0.968089	0.031911	2.53904	107.904	1.06904	0
CETP	0.968089	0.031911	2.53904	107.904	1.06904	0
CFAP221	0.968089	0.031911	2.53904	107.904	1.06904	0
CHD5	0.968089	0.031911	2.53904	107.904	1.06904	0
CHGB	0.968089	0.031911	2.53904	107.904	1.06904	0
CHRM1	0.968089	0.031911	2.53904	107.904	1.06904	0
CHRNA1	0.968089	0.031911	2.53904	107.904	1.06904	0
CHRNE	0.968089	0.031911	2.53904	107.904	1.06904	0
CHST1	0.968089	0.031911	2.53904	107.904	1.06904	0
CIDEB	0.968089	0.031911	2.53904	107.904	1.06904	0
CLDN19	0.968089	0.031911	2.53904	107.904	1.06904	0
CLEC1A	0.968089	0.031911	2.53904	107.904	1.06904	0
CLLU1	0.968089	0.031911	2.53904	107.904	1.06904	0
CLLU1OS	0.968089	0.031911	2.53904	107.904	1.06904	0
CLRN3	0.968089	0.031911	2.53904	107.904	1.06904	0
CNTD1	0.968089	0.031911	2.53904	107.904	1.06904	0
COL14A1	0.968089	0.031911	2.53904	107.904	1.06904	0
COX8C	0.968089	0.031911	2.53904	107.904	1.06904	0
CRTAC1	0.968089	0.031911	2.53904	107.904	1.06904	0
CSF3R	0.968089	0.031911	2.53904	107.904	1.06904	0
CSRP3	0.968089	0.031911	2.53904	107.904	1.06904	0
CST4	0.968089	0.031911	2.53904	107.904	1.06904	0
CTNNA2	0.968089	0.031911	2.53904	107.904	1.06904	0
CTXN3	0.968089	0.031911	2.53904	107.904	1.06904	0
CXorf58	0.968089	0.031911	2.53904	107.904	1.06904	0
CYP21A2	0.968089	0.031911	2.53904	107.904	1.06904	0
CYP2C9	0.968089	0.031911	2.53904	107.904	1.06904	0
DGCR10	0.968089	0.031911	2.53904	107.904	1.06904	0
DHH	0.968089	0.031911	2.53904	107.904	1.06904	0
DIO3	0.968089	0.031911	2.53904	107.904	1.06904	0
DIRC1	0.968089	0.031911	2.53904	107.904	1.06904	0
DLGAP1	0.968089	0.031911	2.53904	107.904	1.06904	0
DLGAP3	0.968089	0.031911	2.53904	107.904	1.06904	0
DLL1	0.968089	0.031911	2.53904	107.904	1.06904	0
DNAI1	0.968089	0.031911	2.53904	107.904	1.06904	0
DNAJB5-AS1	0.968089	0.031911	2.53904	107.904	1.06904	0
DNASE1L3	0.968089	0.031911	2.53904	107.904	1.06904	0
DNASE2B	0.968089	0.031911	2.53904	107.904	1.06904	0
DOCK8	0.968089	0.031911	2.53904	107.904	1.06904	0
DRD2	0.968089	0.031911	2.53904	107.904	1.06904	0
DYNAP	0.968089	0.031911	2.53904	107.904	1.06904	0
EDARADD	0.968089	0.031911	2.53904	107.904	1.06904	0
EPHB1	0.968089	0.031911	2.53904	107.904	1.06904	0
ESPNL	0.968089	0.031911	2.53904	107.904	1.06904	0
ESPNP	0.968089	0.031911	2.53904	107.904	1.06904	0
EVX1	0.968089	0.031911	2.53904	107.904	1.06904	0
FAIM2	0.968089	0.031911	2.53904	107.904	1.06904	0
FALEC	0.968089	0.031911	2.53904	107.904	1.06904	0
FAM129C	0.968089	0.031911	2.53904	107.904	1.06904	0
FAM134B	0.968089	0.031911	2.53904	107.904	1.06904	0
FAM198A	0.968089	0.031911	2.53904	107.904	1.06904	0
FAM215A	0.968089	0.031911	2.53904	107.904	1.06904	0
FAM25C	0.968089	0.031911	2.53904	107.904	1.06904	0
FAM3D	0.968089	0.031911	2.53904	107.904	1.06904	0
FAM71A	0.968089	0.031911	2.53904	107.904	1.06904	0
FAM83A-AS1	0.968089	0.031911	2.53904	107.904	1.06904	0
FBN3	0.968089	0.031911	2.53904	107.904	1.06904	0
FBXO40	0.968089	0.031911	2.53904	107.904	1.06904	0
FBXO47	0.968089	0.031911	2.53904	107.904	1.06904	0
FENDRR	0.968089	0.031911	2.53904	107.904	1.06904	0
FEV	0.968089	0.031911	2.53904	107.904	1.06904	0
FGD2	0.968089	0.031911	2.53904	107.904	1.06904	0
FGF22	0.968089	0.031911	2.53904	107.904	1.06904	0
FGR	0.968089	0.031911	2.53904	107.904	1.06904	0
FKBP1AP1	0.968089	0.031911	2.53904	107.904	1.06904	0
FKBP6	0.968089	0.031911	2.53904	107.904	1.06904	0
FLJ34503	0.968089	0.031911	2.53904	107.904	1.06904	0
FLJ36777	0.968089	0.031911	2.53904	107.904	1.06904	0
FNDC5	0.968089	0.031911	2.53904	107.904	1.06904	0
FOXA3	0.968089	0.031911	2.53904	107.904	1.06904	0
FOXH1	0.968089	0.031911	2.53904	107.904	1.06904	0
FXYD7	0.968089	0.031911	2.53904	107.904	1.06904	0
GALNTL6	0.968089	0.031911	2.53904	107.904	1.06904	0
GALR3	0.968089	0.031911	2.53904	107.904	1.06904	0
GATA3-AS1	0.968089	0.031911	2.53904	107.904	1.06904	0
GCKR	0.968089	0.031911	2.53904	107.904	1.06904	0
GDA	0.968089	0.031911	2.53904	107.904	1.06904	0
GFAP	0.968089	0.031911	2.53904	107.904	1.06904	0
GFRA2	0.968089	0.031911	2.53904	107.904	1.06904	0
GFRA3	0.968089	0.031911	2.53904	107.904	1.06904	0
GFY	0.968089	0.031911	2.53904	107.904	1.06904	0
GH1	0.968089	0.031911	2.53904	107.904	1.06904	0
GLRA3	0.968089	0.031911	2.53904	107.904	1.06904	0
GMFG	0.968089	0.031911	2.53904	107.904	1.06904	0
GMNC	0.968089	0.031911	2.53904	107.904	1.06904	0
GNG12-AS1	0.968089	0.031911	2.53904	107.904	1.06904	0
GNG13	0.968089	0.031911	2.53904	107.904	1.06904	0
GP1BB	0.968089	0.031911	2.53904	107.904	1.06904	0
GPC3	0.968089	0.031911	2.53904	107.904	1.06904	0
GPM6B	0.968089	0.031911	2.53904	107.904	1.06904	0
GPR15	0.968089	0.031911	2.53904	107.904	1.06904	0
GPR179	0.968089	0.031911	2.53904	107.904	1.06904	0
GPR83	0.968089	0.031911	2.53904	107.904	1.06904	0
GRAPL	0.968089	0.031911	2.53904	107.904	1.06904	0
GRIA4	0.968089	0.031911	2.53904	107.904	1.06904	0
GRM8	0.968089	0.031911	2.53904	107.904	1.06904	0
GSN-AS1	0.968089	0.031911	2.53904	107.904	1.06904	0
GSTA2	0.968089	0.031911	2.53904	107.904	1.06904	0
GSTT2B	0.968089	0.031911	2.53904	107.904	1.06904	0
GTF2IRD1P1	0.968089	0.031911	2.53904	107.904	1.06904	0
GUCY2C	0.968089	0.031911	2.53904	107.904	1.06904	0
GVINP1	0.968089	0.031911	2.53904	107.904	1.06904	0
H2BFWT	0.968089	0.031911	2.53904	107.904	1.06904	0
HCG25	0.968089	0.031911	2.53904	107.904	1.06904	0
HCRT	0.968089	0.031911	2.53904	107.904	1.06904	0
HID1-AS1	0.968089	0.031911	2.53904	107.904	1.06904	0
HIGD2B	0.968089	0.031911	2.53904	107.904	1.06904	0
HIPK4	0.968089	0.031911	2.53904	107.904	1.06904	0
HIST1H2AL	0.968089	0.031911	2.53904	107.904	1.06904	0
HLA-DQB2	0.968089	0.031911	2.53904	107.904	1.06904	0
HLA-J	0.968089	0.031911	2.53904	107.904	1.06904	0
HOXD3	0.968089	0.031911	2.53904	107.904	1.06904	0
HRK	0.968089	0.031911	2.53904	107.904	1.06904	0
HSPA7	0.968089	0.031911	2.53904	107.904	1.06904	0
HSPB2	0.968089	0.031911	2.53904	107.904	1.06904	0
[truncated: 15,590 more rows]
