# Supplementary material for: STAT3 induces G9a to exacerbate HER3 expression for the survival of epidermal growth factor receptor-tyrosine kinase inhibitors in lung cancers
Source: BMC Cancer. 2019 Oct 16;19:959. doi: 10.1186/s12885-019-6217-9 (PMC6796430; doi:10.1186/s12885-019-6217-9)
Supplement: Supplementary file 4 — Additional file 4: Table S4. Differential genes in the A549shSTAT3 cells analyzed by RNAseq. (XLSX 109 kb) [file 12885_2019_6217_MOESM4_ESM.xlsx]

## Sheet: RNAseq A549STATvsA549Luc.DEG
Gene_id	readcount_A549STAT	readcount_A549Luc	Gene name	log2.Fold_change.	pvalue	qvalue	Gene name	Gene description
ENSG00000117983	0	345.556	MUC5B	-11.91	6.25e-43	1.6e-40	MUC5B	mucin 5B, oligomeric mucus/gel-forming [Source:HGNC Symbol;Acc:HGNC:7516]
ENSG00000171557	0	38.3255	FGG	-8.7379	6.3e-09	1.88e-07	FGG	fibrinogen gamma chain [Source:HGNC Symbol;Acc:HGNC:3694]
ENSG00000148346	0	94.9262	LCN2	-8.4614	1.61e-20	1.46e-18	LCN2	lipocalin 2 [Source:HGNC Symbol;Acc:HGNC:6526]
ENSG00000171560	0	67.3569	FGA	-7.9664	1.04e-15	6.33e-14	FGA	fibrinogen alpha chain [Source:HGNC Symbol;Acc:HGNC:3661]
ENSG00000047457	0	192.881	CP	-7.8993	3.19e-42	7.93e-40	CP	ceruloplasmin [Source:HGNC Symbol;Acc:HGNC:2295]
ENSG00000108342	0	13.5758	CSF3	-7.2406	0.00020722	0.0026929	CSF3	colony stimulating factor 3 [Source:HGNC Symbol;Acc:HGNC:2438]
ENSG00000124107	0	57.645	SLPI	-7.0048	1.33e-14	7.34e-13	SLPI	secretory leukocyte peptidase inhibitor [Source:HGNC Symbol;Acc:HGNC:11092]
ENSG00000163631	0	31.8509	ALB	-6.8859	9.17e-09	2.7e-07	ALB	albumin [Source:HGNC Symbol;Acc:HGNC:399]
ENSG00000086548	0	46.6799	CEACAM6	-6.7004	2.78e-12	1.19e-10	CEACAM6	carcinoembryonic antigen related cell adhesion molecule 6 [Source:HGNC Symbol;Acc:HGNC:1818]
ENSG00000164692	0	49.7083	COL1A2	-6.6354	5.13e-13	2.4e-11	COL1A2	collagen type I alpha 2 chain [Source:HGNC Symbol;Acc:HGNC:2198]
ENSG00000171564	0	46.8887	FGB	-6.5512	2.12e-12	9.24e-11	FGB	fibrinogen beta chain [Source:HGNC Symbol;Acc:HGNC:3662]
ENSG00000124664	0	30.9111	SPDEF	-6.4277	1.08e-08	3.16e-07	SPDEF	SAM pointed domain containing ETS transcription factor [Source:HGNC Symbol;Acc:HGNC:17257]
ENSG00000106541	4.30895	355.164	AGR2	-6.365	7.49e-84	5.82e-81	AGR2	anterior gradient 2, protein disulphide isomerase family member [Source:HGNC Symbol;Acc:HGNC:328]
ENSG00000172794	0	27.4649	RAB37	-6.2571	6.55e-08	1.7e-06	RAB37	RAB37, member RAS oncogene family [Source:HGNC Symbol;Acc:HGNC:30268]
ENSG00000168306	0	13.2625	ACOX2	-6.2069	0.00017199	0.0022809	ACOX2	acyl-CoA oxidase 2 [Source:HGNC Symbol;Acc:HGNC:120]
ENSG00000137673	1.34655	99.2078	MMP7	-6.2031	9.06e-25	1.07e-22	MMP7	matrix metallopeptidase 7 [Source:HGNC Symbol;Acc:HGNC:7174]
ENSG00000135549	0	18.3796	PKIB	-6.0927	9.53e-06	0.00016927	PKIB	cAMP-dependent protein kinase inhibitor beta [Source:HGNC Symbol;Acc:HGNC:9018]
ENSG00000250799	0	11.9049	PRODH2	-6.0511	0.00036447	0.0044169	PRODH2	proline dehydrogenase 2 [Source:HGNC Symbol;Acc:HGNC:17325]
ENSG00000115009	0	50.9615	CCL20	-5.979	1.6e-13	7.96e-12	CCL20	C-C motif chemokine ligand 20 [Source:HGNC Symbol;Acc:HGNC:10619]
ENSG00000163993	1.52609	84.5877	S100P	-5.7925	1.91e-21	1.88e-19	S100P	S100 calcium binding protein P [Source:HGNC Symbol;Acc:HGNC:10504]
ENSG00000168542	0	38.2211	COL3A1	-5.564	1.7e-10	6.14e-09	COL3A1	collagen type III alpha 1 chain [Source:HGNC Symbol;Acc:HGNC:2201]
ENSG00000090339	0	40.3097	ICAM1	-5.4888	5.58e-11	2.15e-09	ICAM1	intercellular adhesion molecule 1 [Source:HGNC Symbol;Acc:HGNC:5344]
ENSG00000181634	0	39.892	TNFSF15	-5.4737	7.06e-11	2.69e-09	TNFSF15	TNF superfamily member 15 [Source:HGNC Symbol;Acc:HGNC:11931]
ENSG00000227507	0	11.6961	LTB	-5.4406	0.00041749	0.0049879	LTB	lymphotoxin beta [Source:HGNC Symbol;Acc:HGNC:6711]
ENSG00000105289	0	41.1451	TJP3	-5.3808	3.75e-11	1.47e-09	TJP3	tight junction protein 3 [Source:HGNC Symbol;Acc:HGNC:11829]
ENSG00000169429	13.0166	534.887	CXCL8	-5.3608	1.3e-125	1.4e-122	CXCL8	C-X-C motif chemokine ligand 8 [Source:HGNC Symbol;Acc:HGNC:6025]
ENSG00000113924	1.52609	61.4044	HGD	-5.3304	6.84e-16	4.27e-14	HGD	homogentisate 1,2-dioxygenase [Source:HGNC Symbol;Acc:HGNC:4892]
ENSG00000155465	1.34655	53.5722	SLC7A7	-5.3141	4.74e-14	2.49e-12	SLC7A7	solute carrier family 7 member 7 [Source:HGNC Symbol;Acc:HGNC:11065]
ENSG00000129988	0	18.7973	LBP	-5.2325	8.23e-06	0.00014792	LBP	lipopolysaccharide binding protein [Source:HGNC Symbol;Acc:HGNC:6517]
ENSG00000079112	0	22.9744	CDH17	-5.1922	8.4e-07	1.81e-05	CDH17	cadherin 17 [Source:HGNC Symbol;Acc:HGNC:1756]
ENSG00000104537	1.07724	39.3698	ANXA13	-5.1917	1.13e-10	4.2e-09	ANXA13	annexin A13 [Source:HGNC Symbol;Acc:HGNC:536]
ENSG00000006611	0	17.2308	USH1C	-5.1069	2.06e-05	0.00034495	USH1C	USH1 protein network component harmonin [Source:HGNC Symbol;Acc:HGNC:12597]
ENSG00000186198	1.16701	39.9964	SLC51B	-5.099	8.83e-11	3.32e-09	SLC51B	solute carrier family 51 beta subunit [Source:HGNC Symbol;Acc:HGNC:29956]
ENSG00000168398	4.30895	146.619	BDKRB2	-5.0886	2.17e-35	4.17e-33	BDKRB2	bradykinin receptor B2 [Source:HGNC Symbol;Acc:HGNC:1030]
ENSG00000157388	0	15.0378	CACNA1D	-5.0662	7.08e-05	0.0010482	CACNA1D	calcium voltage-gated channel subunit alpha1 D [Source:HGNC Symbol;Acc:HGNC:1391]
ENSG00000140519	0	32.8952	RHCG	-5.058	4.21e-09	1.29e-07	RHCG	Rh family C glycoprotein [Source:HGNC Symbol;Acc:HGNC:18140]
ENSG00000204616	0	23.2877	TRIM31	-5.0191	7.86e-07	1.71e-05	TRIM31	tripartite motif containing 31 [Source:HGNC Symbol;Acc:HGNC:16289]
ENSG00000275395	1.7954	57.8538	FCGBP	-5.01	7.11e-15	4.02e-13	FCGBP	Fc fragment of IgG binding protein [Source:HGNC Symbol;Acc:HGNC:13572]
ENSG00000118849	2.51355	80.0973	RARRES1	-4.994	5.54e-20	4.91e-18	RARRES1	retinoic acid receptor responder 1 [Source:HGNC Symbol;Acc:HGNC:9867]
ENSG00000079385	1.07724	33.2085	CEACAM1	-4.9461	3.97e-09	1.22e-07	CEACAM1	carcinoembryonic antigen related cell adhesion molecule 1 [Source:HGNC Symbol;Acc:HGNC:1814]
ENSG00000138207	1.52609	46.471	RBP4	-4.9284	3.45e-12	1.46e-10	RBP4	retinol binding protein 4 [Source:HGNC Symbol;Acc:HGNC:9922]
ENSG00000136244	0	13.5758	IL6	-4.9187	0.00017011	0.0022575	IL6	interleukin 6 [Source:HGNC Symbol;Acc:HGNC:6018]
ENSG00000165929	0	21.3036	TC2N	-4.8906	2.53e-06	5.01e-05	TC2N	tandem C2 domains, nuclear [Source:HGNC Symbol;Acc:HGNC:19859]
ENSG00000165272	1.61586	47.5153	AQP3	-4.878	2.15e-12	9.34e-11	AQP3	aquaporin 3 (Gill blood group) [Source:HGNC Symbol;Acc:HGNC:636]
ENSG00000198848	2.24425	60.6734	CES1	-4.7568	2.72e-15	1.6e-13	CES1	carboxylesterase 1 [Source:HGNC Symbol;Acc:HGNC:1863]
ENSG00000123838	0	13.4714	C4BPA	-4.7518	0.0001966	0.0025704	C4BPA	complement component 4 binding protein alpha [Source:HGNC Symbol;Acc:HGNC:1325]
ENSG00000162366	0	18.9017	PDZK1IP1	-4.7181	1.06e-05	0.00018717	PDZK1IP1	PDZK1 interacting protein 1 [Source:HGNC Symbol;Acc:HGNC:16887]
ENSG00000091513	0	13.0537	TF	-4.7064	0.00025366	0.0032357	TF	transferrin [Source:HGNC Symbol;Acc:HGNC:11740]
ENSG00000161270	0	18.484	NPHS1	-4.6858	1.36e-05	0.00023562	NPHS1	NPHS1, nephrin [Source:HGNC Symbol;Acc:HGNC:7908]
ENSG00000125730	21.9936	565.38	C3	-4.6841	7.12e-128	8.64e-125	C3	complement C3 [Source:HGNC Symbol;Acc:HGNC:1318]
ENSG00000065361	1.07724	27.5693	ERBB3	-4.6777	1.09e-07	2.73e-06	ERBB3	erb-b2 receptor tyrosine kinase 3 [Source:HGNC Symbol;Acc:HGNC:3431]
ENSG00000198758	0	12.5315	EPS8L3	-4.6475	0.00034927	0.0042539	EPS8L3	EPS8 like 3 [Source:HGNC Symbol;Acc:HGNC:21297]
ENSG00000151655	0	13.0537	ITIH2	-4.599	0.000271	0.0034254	ITIH2	inter-alpha-trypsin inhibitor heavy chain 2 [Source:HGNC Symbol;Acc:HGNC:6167]
ENSG00000010310	0	12.7404	GIPR	-4.564	0.00032853	0.0040317	GIPR	gastric inhibitory polypeptide receptor [Source:HGNC Symbol;Acc:HGNC:4271]
ENSG00000039068	4.39872	101.401	CDH1	-4.5268	4.76e-24	5.37e-22	CDH1	cadherin 1 [Source:HGNC Symbol;Acc:HGNC:1748]
ENSG00000170099	0	14.098	SERPINA6	-4.4877	0.00016723	0.0022266	SERPINA6	serpin family A member 6 [Source:HGNC Symbol;Acc:HGNC:1540]
ENSG00000003436	8.70767	194.552	TFPI	-4.4817	2.11e-44	5.76e-42	TFPI	tissue factor pathway inhibitor [Source:HGNC Symbol;Acc:HGNC:11760]
ENSG00000160179	0	17.9618	ABCG1	-4.4746	2.18e-05	0.00036197	ABCG1	ATP binding cassette subfamily G member 1 [Source:HGNC Symbol;Acc:HGNC:73]
ENSG00000170458	1.25678	26.0029	CD14	-4.3709	3.78e-07	8.73e-06	CD14	CD14 molecule [Source:HGNC Symbol;Acc:HGNC:1628]
ENSG00000227471	1.70563	34.6705	AKR1B15	-4.3453	4.72e-09	1.43e-07	AKR1B15	aldo-keto reductase family 1 member B15 [Source:HGNC Symbol;Acc:HGNC:37281]
ENSG00000198203	0	14.5157	SULT1C2	-4.3372	0.00015205	0.0020477	SULT1C2	sulfotransferase family 1C member 2 [Source:HGNC Symbol;Acc:HGNC:11456]
ENSG00000198732	6.01458	121.242	SMOC1	-4.3333	7.07e-28	9.73e-26	SMOC1	SPARC related modular calcium binding 1 [Source:HGNC Symbol;Acc:HGNC:20318]
ENSG00000179913	1.34655	26.6295	B3GNT3	-4.3057	3.05e-07	7.1e-06	B3GNT3	UDP-GlcNAc:betaGal beta-1,3-N-acetylglucosaminyltransferase 3 [Source:HGNC Symbol;Acc:HGNC:13528]
ENSG00000104140	1.88517	36.968	RHOV	-4.2935	1.65e-09	5.3e-08	RHOV	ras homolog family member V [Source:HGNC Symbol;Acc:HGNC:18313]
ENSG00000073756	40.3964	791.678	PTGS2	-4.2926	2.69e-171	5.22e-168	PTGS2	prostaglandin-endoperoxide synthase 2 [Source:HGNC Symbol;Acc:HGNC:9605]
ENSG00000171303	1.07724	20.8859	KCNK3	-4.2771	5.99e-06	0.00011148	KCNK3	potassium two pore domain channel subfamily K member 3 [Source:HGNC Symbol;Acc:HGNC:6278]
ENSG00000163739	30.6115	580.627	CXCL1	-4.2455	1.99e-125	1.93e-122	CXCL1	C-X-C motif chemokine ligand 1 [Source:HGNC Symbol;Acc:HGNC:4602]
ENSG00000125740	6.28389	117.692	FOSB	-4.2272	8.96e-27	1.18e-24	FOSB	FosB proto-oncogene, AP-1 transcription factor subunit [Source:HGNC Symbol;Acc:HGNC:3797]
ENSG00000173918	12.5678	225.567	C1QTNF1	-4.1658	2.33e-49	8.23e-47	C1QTNF1	C1q and TNF related 1 [Source:HGNC Symbol;Acc:HGNC:14324]
ENSG00000163131	4.12941	71.9518	CTSS	-4.123	9.1e-17	6.19e-15	CTSS	cathepsin S [Source:HGNC Symbol;Acc:HGNC:2545]
ENSG00000142303	13.5552	212.096	ADAMTS10	-3.9678	3.29e-45	9.52e-43	ADAMTS10	ADAM metallopeptidase with thrombospondin type 1 motif 10 [Source:HGNC Symbol;Acc:HGNC:13201]
ENSG00000120211	8.43836	128.97	INSL4	-3.9339	5.19e-28	7.25e-26	INSL4	insulin like 4 [Source:HGNC Symbol;Acc:HGNC:6087]
ENSG00000085831	0	13.6802	TTC39A	-3.9297	0.00035395	0.0043028	TTC39A	tetratricopeptide repeat domain 39A [Source:HGNC Symbol;Acc:HGNC:18657]
ENSG00000133636	2.24425	33.7307	NTS	-3.9098	2.15e-08	6.03e-07	NTS	neurotensin [Source:HGNC Symbol;Acc:HGNC:8038]
ENSG00000146678	4.57826	68.4012	IGFBP1	-3.9011	1.61e-15	9.67e-14	IGFBP1	insulin like growth factor binding protein 1 [Source:HGNC Symbol;Acc:HGNC:5469]
ENSG00000168955	7.27135	107.667	TM4SF20	-3.8882	1.75e-23	1.9e-21	TM4SF20	transmembrane 4 L six family member 20 [Source:HGNC Symbol;Acc:HGNC:26230]
ENSG00000104760	3.94987	57.1228	FGL1	-3.8542	4.1e-13	1.95e-11	FGL1	fibrinogen like 1 [Source:HGNC Symbol;Acc:HGNC:3695]
ENSG00000000971	15.0813	216.064	CFH	-3.8406	4.51e-45	1.29e-42	CFH	complement factor H [Source:HGNC Symbol;Acc:HGNC:4883]
ENSG00000169174	4.7578	67.7746	PCSK9	-3.8324	3.16e-15	1.86e-13	PCSK9	proprotein convertase subtilisin/kexin type 9 [Source:HGNC Symbol;Acc:HGNC:20001]
ENSG00000081041	15.5302	218.257	CXCL2	-3.8129	2.71e-45	8.1e-43	CXCL2	C-X-C motif chemokine ligand 2 [Source:HGNC Symbol;Acc:HGNC:4603]
ENSG00000123689	1.34655	18.9017	G0S2	-3.8112	3.24e-05	0.00051984	G0S2	G0/G1 switch 2 [Source:HGNC Symbol;Acc:HGNC:30229]
ENSG00000106927	1.52609	21.0947	AMBP	-3.789	1.18e-05	0.0002066	AMBP	alpha-1-microglobulin/bikunin precursor [Source:HGNC Symbol;Acc:HGNC:453]
ENSG00000172602	5.02711	69.341	RND1	-3.7859	2.01e-15	1.2e-13	RND1	Rho family GTPase 1 [Source:HGNC Symbol;Acc:HGNC:18314]
ENSG00000142089	1.70563	23.0789	IFITM3	-3.7582	4.9e-06	9.25e-05	IFITM3	interferon induced transmembrane protein 3 [Source:HGNC Symbol;Acc:HGNC:5414]
ENSG00000196878	5.83504	78.8441	LAMB3	-3.7562	3.07e-17	2.17e-15	LAMB3	laminin subunit beta 3 [Source:HGNC Symbol;Acc:HGNC:6490]
ENSG00000136883	1.52609	20.3637	KIF12	-3.7381	1.84e-05	0.00030925	KIF12	kinesin family member 12 [Source:HGNC Symbol;Acc:HGNC:21495]
ENSG00000112096	100.363	1301.29	SOD2	-3.6967	5.14e-255	2.5e-251	SOD2	superoxide dismutase 2 [Source:HGNC Symbol;Acc:HGNC:11180]
ENSG00000164647	11.1315	140.875	STEAP1	-3.6617	5.01e-29	7.3e-27	STEAP1	STEAP family member 1 [Source:HGNC Symbol;Acc:HGNC:11378]
ENSG00000165376	29.8036	374.483	CLDN2	-3.6513	4.13e-74	2.67e-71	CLDN2	claudin 2 [Source:HGNC Symbol;Acc:HGNC:2041]
ENSG00000159403	12.2087	149.752	C1R	-3.6166	1.77e-30	2.73e-28	C1R	complement C1r [Source:HGNC Symbol;Acc:HGNC:1246]
ENSG00000130707	13.9143	170.637	ASS1	-3.6163	1.72e-34	3.02e-32	ASS1	argininosuccinate synthase 1 [Source:HGNC Symbol;Acc:HGNC:758]
ENSG00000074410	147.671	1751.28	CA12	-3.5679	0	0	CA12	carbonic anhydrase 12 [Source:HGNC Symbol;Acc:HGNC:1371]
ENSG00000076864	6.46343	76.1289	RAP1GAP	-3.5581	4.31e-16	2.74e-14	RAP1GAP	RAP1 GTPase activating protein [Source:HGNC Symbol;Acc:HGNC:9858]
ENSG00000258130	1.34655	15.7688	AC106782.1	-3.5497	0.00021861	0.0028258	AC106782.1	-
ENSG00000091583	2.33401	27.1516	APOH	-3.5402	1.26e-06	2.65e-05	APOH	apolipoprotein H [Source:HGNC Symbol;Acc:HGNC:616]
ENSG00000134548	3.94987	45.8445	SPX	-3.5369	3.1e-10	1.09e-08	SPX	spexin hormone [Source:HGNC Symbol;Acc:HGNC:28139]
ENSG00000088881	1.88517	21.8257	EBF4	-3.5333	1.42e-05	0.00024417	EBF4	early B-cell factor 4 [Source:HGNC Symbol;Acc:HGNC:29278]
ENSG00000004468	5.11688	59.2114	CD38	-3.5325	8.73e-13	3.99e-11	CD38	CD38 molecule [Source:HGNC Symbol;Acc:HGNC:1667]
ENSG00000108176	5.6555	64.7462	DNAJC12	-3.5171	8.47e-14	4.31e-12	DNAJC12	DnaJ heat shock protein family (Hsp40) member C12 [Source:HGNC Symbol;Acc:HGNC:28908]
ENSG00000182326	27.8286	318.405	C1S	-3.5162	1.64e-61	7.97e-59	C1S	complement C1s [Source:HGNC Symbol;Acc:HGNC:1247]
ENSG00000143416	4.03964	44.5913	SELENBP1	-3.4645	7.49e-10	2.52e-08	SELENBP1	selenium binding protein 1 [Source:HGNC Symbol;Acc:HGNC:10719]
ENSG00000088002	3.14194	34.2528	SULT2B1	-3.4465	7.31e-08	1.89e-06	SULT2B1	sulfotransferase family 2B member 1 [Source:HGNC Symbol;Acc:HGNC:11459]
ENSG00000170345	35.8182	388.895	FOS	-3.4406	1.93e-73	1.21e-70	FOS	Fos proto-oncogene, AP-1 transcription factor subunit [Source:HGNC Symbol;Acc:HGNC:3796]
ENSG00000266714	13.9143	149.021	MYO15B	-3.4209	4.36e-29	6.41e-27	MYO15B	myosin XVB [Source:HGNC Symbol;Acc:HGNC:14083]
ENSG00000167281	7.00204	73.6226	RBFOX3	-3.3943	4.42e-15	2.56e-13	RBFOX3	RNA binding protein, fox-1 homolog 3 [Source:HGNC Symbol;Acc:HGNC:27097]
ENSG00000169242	14.2734	148.185	EFNA1	-3.376	1.25e-28	1.76e-26	EFNA1	ephrin A1 [Source:HGNC Symbol;Acc:HGNC:3221]
ENSG00000113532	2.69309	27.8826	ST8SIA4	-3.372	1.49e-06	3.06e-05	ST8SIA4	ST8 alpha-N-acetyl-neuraminide alpha-2,8-sialyltransferase 4 [Source:HGNC Symbol;Acc:HGNC:10871]
ENSG00000176532	1.97494	20.0504	PRR15	-3.3438	4.77e-05	0.00073165	PRR15	proline rich 15 [Source:HGNC Symbol;Acc:HGNC:22310]
ENSG00000139508	2.60332	26.3162	SLC46A3	-3.3375	3.24e-06	6.28e-05	SLC46A3	solute carrier family 46 member 3 [Source:HGNC Symbol;Acc:HGNC:27501]
ENSG00000108821	16.6074	165.625	COL1A1	-3.318	2.34e-31	3.66e-29	COL1A1	collagen type I alpha 1 chain [Source:HGNC Symbol;Acc:HGNC:2197]
ENSG00000163898	3.8601	38.2211	LIPH	-3.3077	2.3e-08	6.42e-07	LIPH	lipase H [Source:HGNC Symbol;Acc:HGNC:18483]
ENSG00000116711	22.5322	218.257	PLA2G4A	-3.276	2.41e-40	5.7e-38	PLA2G4A	phospholipase A2 group IVA [Source:HGNC Symbol;Acc:HGNC:9035]
ENSG00000168071	1.7954	17.3353	CCDC88B	-3.2713	0.00018041	0.002373	CCDC88B	coiled-coil domain containing 88B [Source:HGNC Symbol;Acc:HGNC:26757]
ENSG00000181444	2.42378	23.1833	ZNF467	-3.2578	1.54e-05	0.0002631	ZNF467	zinc finger protein 467 [Source:HGNC Symbol;Acc:HGNC:23154]
ENSG00000145703	7.98951	76.3378	IQGAP2	-3.2562	4.41e-15	2.56e-13	IQGAP2	IQ motif containing GTPase activating protein 2 [Source:HGNC Symbol;Acc:HGNC:6111]
ENSG00000103089	5.6555	53.9899	FA2H	-3.255	4.27e-11	1.66e-09	FA2H	fatty acid 2-hydroxylase [Source:HGNC Symbol;Acc:HGNC:21197]
ENSG00000185201	8.97698	85.632	IFITM2	-3.2538	1.01e-16	6.8e-15	IFITM2	interferon induced transmembrane protein 2 [Source:HGNC Symbol;Acc:HGNC:5413]
ENSG00000106804	11.9394	113.828	C5	-3.2531	1.04e-21	1.03e-19	C5	complement C5 [Source:HGNC Symbol;Acc:HGNC:1331]
ENSG00000120738	25.3151	236.637	EGR1	-3.2246	5.24e-43	1.35e-40	EGR1	early growth response 1 [Source:HGNC Symbol;Acc:HGNC:3238]
ENSG00000164125	3.94987	36.3414	FAM198B	-3.2017	7.87e-08	2.01e-06	FAM198B	family with sequence similarity 198 member B [Source:HGNC Symbol;Acc:HGNC:25312]
ENSG00000168453	8.6179	78.2175	HR	-3.1821	3.96e-15	2.31e-13	HR	HR, lysine demethylase and nuclear receptor corepressor [Source:HGNC Symbol;Acc:HGNC:5172]
ENSG00000106789	1.7954	16.1865	CORO2A	-3.1724	0.00035866	0.0043574	CORO2A	coronin 2A [Source:HGNC Symbol;Acc:HGNC:2255]
ENSG00000197766	9.60537	86.2586	CFD	-3.1668	1.85e-16	1.22e-14	CFD	complement factor D [Source:HGNC Symbol;Acc:HGNC:2771]
ENSG00000079308	2.33401	20.7814	TNS1	-3.1544	5.51e-05	0.00083325	TNS1	tensin 1 [Source:HGNC Symbol;Acc:HGNC:11973]
ENSG00000163734	16.2483	141.815	CXCL3	-3.1256	9.53e-26	1.2e-23	CXCL3	C-X-C motif chemokine ligand 3 [Source:HGNC Symbol;Acc:HGNC:4604]
ENSG00000162878	9.78491	84.3789	PKDCC	-3.1083	6.99e-16	4.35e-14	PKDCC	protein kinase domain containing, cytoplasmic [Source:HGNC Symbol;Acc:HGNC:25123]
ENSG00000107957	6.19412	53.0501	SH3PXD2A	-3.0984	1.66e-10	6.03e-09	SH3PXD2A	SH3 and PX domains 2A [Source:HGNC Symbol;Acc:HGNC:23664]
ENSG00000163874	27.9184	238.934	ZC3H12A	-3.0973	7.03e-42	1.7e-39	ZC3H12A	zinc finger CCCH-type containing 12A [Source:HGNC Symbol;Acc:HGNC:26259]
ENSG00000111266	17.6847	148.498	DUSP16	-3.0699	1.87e-26	2.45e-24	DUSP16	dual specificity phosphatase 16 [Source:HGNC Symbol;Acc:HGNC:17909]
ENSG00000130720	2.33401	19.4238	FIBCD1	-3.0569	0.00012226	0.0017066	FIBCD1	fibrinogen C domain containing 1 [Source:HGNC Symbol;Acc:HGNC:25922]
ENSG00000156687	2.06471	16.8131	UNC5D	-3.0256	0.00037623	0.0045339	UNC5D	unc-5 netrin receptor D [Source:HGNC Symbol;Acc:HGNC:18634]
ENSG00000143512	7.98951	64.1196	HHIPL2	-3.0046	4.48e-12	1.88e-10	HHIPL2	HHIP like 2 [Source:HGNC Symbol;Acc:HGNC:25842]
ENSG00000163735	245.52	1947.61	CXCL5	-2.9878	0	0	CXCL5	C-X-C motif chemokine ligand 5 [Source:HGNC Symbol;Acc:HGNC:10642]
ENSG00000008517	4.7578	37.3857	IL32	-2.9741	1.45e-07	3.54e-06	IL32	interleukin 32 [Source:HGNC Symbol;Acc:HGNC:16830]
ENSG00000108691	13.9143	107.98	CCL2	-2.9561	5.12e-19	4.11e-17	CCL2	C-C motif chemokine ligand 2 [Source:HGNC Symbol;Acc:HGNC:10618]
ENSG00000178607	11.4008	88.4516	ERN1	-2.9558	7.43e-16	4.59e-14	ERN1	endoplasmic reticulum to nucleus signaling 1 [Source:HGNC Symbol;Acc:HGNC:3449]
ENSG00000137868	23.3401	176.903	STRA6	-2.9221	8.52e-30	1.27e-27	STRA6	stimulated by retinoic acid 6 [Source:HGNC Symbol;Acc:HGNC:30650]
ENSG00000153162	3.77033	28.4048	BMP6	-2.9134	5.73e-06	0.00010739	BMP6	bone morphogenetic protein 6 [Source:HGNC Symbol;Acc:HGNC:1073]
ENSG00000261578	8.79744	65.7904	AP003119.3	-2.9027	5.55e-12	2.32e-10	AP003119.3	-
ENSG00000205336	17.7744	131.268	ADGRG1	-2.8846	2.94e-22	3.04e-20	ADGRG1	adhesion G protein-coupled receptor G1 [Source:HGNC Symbol;Acc:HGNC:4512]
ENSG00000163683	10.144	73.4138	SMIM14	-2.8554	5.28e-13	2.46e-11	SMIM14	small integral membrane protein 14 [Source:HGNC Symbol;Acc:HGNC:27321]
ENSG00000155158	2.87263	20.5726	TTC39B	-2.8403	0.00013879	0.0018972	TTC39B	tetratricopeptide repeat domain 39B [Source:HGNC Symbol;Acc:HGNC:23704]
ENSG00000168389	3.59079	25.6896	MFSD2A	-2.8388	2.07e-05	0.00034603	MFSD2A	major facilitator superfamily domain containing 2A [Source:HGNC Symbol;Acc:HGNC:25897]
ENSG00000188747	2.78286	19.6327	NOXA1	-2.8186	0.00020941	0.0027158	NOXA1	NADPH oxidase activator 1 [Source:HGNC Symbol;Acc:HGNC:10668]
ENSG00000186907	7.18158	50.0216	RTN4RL2	-2.8002	3.69e-09	1.14e-07	RTN4RL2	reticulon 4 receptor like 2 [Source:HGNC Symbol;Acc:HGNC:23053]
ENSG00000152527	5.83504	40.2053	PLEKHH2	-2.7846	1.35e-07	3.31e-06	PLEKHH2	pleckstrin homology, MyTH4 and FERM domain containing H2 [Source:HGNC Symbol;Acc:HGNC:30506]
ENSG00000157214	17.3256	119.363	STEAP2	-2.7844	1.06e-19	9.21e-18	STEAP2	STEAP2 metalloreductase [Source:HGNC Symbol;Acc:HGNC:17885]
ENSG00000125089	4.30895	29.6579	SH3TC1	-2.783	6.01e-06	0.00011169	SH3TC1	SH3 domain and tetratricopeptide repeats 1 [Source:HGNC Symbol;Acc:HGNC:26009]
ENSG00000176153	70.6488	485.492	GPX2	-2.7807	7.36e-75	5.1e-72	GPX2	glutathione peroxidase 2 [Source:HGNC Symbol;Acc:HGNC:4554]
ENSG00000065054	22.9811	157.166	SLC9A3R2	-2.7738	2.45e-25	2.97e-23	SLC9A3R2	SLC9A3 regulator 2 [Source:HGNC Symbol;Acc:HGNC:11076]
ENSG00000233621	4.57826	30.8066	LINC01137	-2.7504	4.56e-06	8.65e-05	LINC01137	long intergenic non-protein coding RNA 1137 [Source:HGNC Symbol;Acc:HGNC:49453]
ENSG00000084636	4.03964	27.1516	COL16A1	-2.7487	1.69e-05	0.00028634	COL16A1	collagen type XVI alpha 1 chain [Source:HGNC Symbol;Acc:HGNC:2193]
ENSG00000008513	11.311	75.0847	ST3GAL1	-2.7308	1.01e-12	4.58e-11	ST3GAL1	ST3 beta-galactoside alpha-2,3-sialyltransferase 1 [Source:HGNC Symbol;Acc:HGNC:10862]
ENSG00000118503	24.8662	164.685	TNFAIP3	-2.7274	5.01e-26	6.39e-24	TNFAIP3	TNF alpha induced protein 3 [Source:HGNC Symbol;Acc:HGNC:11896]
ENSG00000171223	34.8307	227.134	JUNB	-2.7051	5.77e-35	1.09e-32	JUNB	JunB proto-oncogene, AP-1 transcription factor subunit [Source:HGNC Symbol;Acc:HGNC:6205]
ENSG00000180066	3.32148	21.5124	C10orf91	-2.6953	0.00015133	0.0020403	C10orf91	chromosome 10 open reading frame 91 [Source:HGNC Symbol;Acc:HGNC:27275]
ENSG00000125772	37.0749	239.874	GPCPD1	-2.6938	1.14e-36	2.25e-34	GPCPD1	glycerophosphocholine phosphodiesterase 1 [Source:HGNC Symbol;Acc:HGNC:26957]
ENSG00000115594	8.16905	52.7368	IL1R1	-2.6906	3.09e-09	9.66e-08	IL1R1	interleukin 1 receptor type 1 [Source:HGNC Symbol;Acc:HGNC:5993]
ENSG00000130433	8.07928	52.1102	CACNG6	-2.6893	3.87e-09	1.19e-07	CACNG6	calcium voltage-gated channel auxiliary subunit gamma 6 [Source:HGNC Symbol;Acc:HGNC:13625]
ENSG00000100219	32.2274	207.71	XBP1	-2.6882	6.52e-32	1.05e-29	XBP1	X-box binding protein 1 [Source:HGNC Symbol;Acc:HGNC:12801]
ENSG00000018236	64.6343	412.078	CNTN1	-2.6725	3.26e-61	1.54e-58	CNTN1	contactin 1 [Source:HGNC Symbol;Acc:HGNC:2171]
ENSG00000267121	4.48849	28.6136	AC008105.3	-2.6724	1.37e-05	0.00023592	AC008105.3	-
ENSG00000135821	9.33606	59.2114	GLUL	-2.665	4.18e-10	1.45e-08	GLUL	glutamate-ammonia ligase [Source:HGNC Symbol;Acc:HGNC:4341]
ENSG00000171227	5.92481	37.4901	TMEM37	-2.6617	6.78e-07	1.49e-05	TMEM37	transmembrane protein 37 [Source:HGNC Symbol;Acc:HGNC:18216]
ENSG00000168679	13.5552	85.632	SLC16A4	-2.6593	6.2e-14	3.24e-12	SLC16A4	solute carrier family 16 member 4 [Source:HGNC Symbol;Acc:HGNC:10925]
ENSG00000174749	3.50102	21.9301	C4orf32	-2.6471	0.00015208	0.0020477	C4orf32	chromosome 4 open reading frame 32 [Source:HGNC Symbol;Acc:HGNC:26813]
ENSG00000184489	4.66803	29.2402	PTP4A3	-2.6471	1.22e-05	0.00021324	PTP4A3	protein tyrosine phosphatase type IVA, member 3 [Source:HGNC Symbol;Acc:HGNC:9636]
ENSG00000165959	8.88721	55.1387	CLMN	-2.6333	2.12e-09	6.7e-08	CLMN	calmin [Source:HGNC Symbol;Acc:HGNC:19972]
ENSG00000198959	155.84	961.272	TGM2	-2.6249	1.5e-137	2.08e-134	TGM2	transglutaminase 2 [Source:HGNC Symbol;Acc:HGNC:11778]
ENSG00000138449	6.10435	37.5945	SLC40A1	-2.6226	8.07e-07	1.75e-05	SLC40A1	solute carrier family 40 member 1 [Source:HGNC Symbol;Acc:HGNC:10909]
ENSG00000130762	5.11688	30.9111	ARHGEF16	-2.5948	8.71e-06	0.0001558	ARHGEF16	Rho guanine nucleotide exchange factor 16 [Source:HGNC Symbol;Acc:HGNC:15515]
ENSG00000121039	20.3777	122.496	RDH10	-2.5877	9.68e-19	7.48e-17	RDH10	retinol dehydrogenase 10 [Source:HGNC Symbol;Acc:HGNC:19975]
ENSG00000168079	5.38619	31.8509	SCARA5	-2.564	7.34e-06	0.00013364	SCARA5	scavenger receptor class A member 5 [Source:HGNC Symbol;Acc:HGNC:28701]
ENSG00000075651	10.144	59.6291	PLD1	-2.5554	9.19e-10	3.05e-08	PLD1	phospholipase D1 [Source:HGNC Symbol;Acc:HGNC:9067]
ENSG00000124920	33.6637	197.58	MYRF	-2.5532	7.99e-29	1.14e-26	MYRF	myelin regulatory factor [Source:HGNC Symbol;Acc:HGNC:1181]
ENSG00000166510	3.50102	20.4681	CCDC68	-2.5475	0.00034238	0.0041832	CCDC68	coiled-coil domain containing 68 [Source:HGNC Symbol;Acc:HGNC:24350]
ENSG00000215182	24.5072	140.98	MUC5AC	-2.5242	8.88e-21	8.28e-19	MUC5AC	mucin 5AC, oligomeric mucus/gel-forming [Source:HGNC Symbol;Acc:HGNC:7515]
ENSG00000067048	4.48849	25.794	DDX3Y	-2.5227	6.41e-05	0.00095234	DDX3Y	DEAD-box helicase 3, Y-linked [Source:HGNC Symbol;Acc:HGNC:2699]
ENSG00000089057	57.9015	332.712	SLC23A2	-2.5226	9.64e-47	3.12e-44	SLC23A2	solute carrier family 23 member 2 [Source:HGNC Symbol;Acc:HGNC:10973]
ENSG00000128242	3.59079	20.5726	GAL3ST1	-2.5183	0.00036204	0.0043957	GAL3ST1	galactose-3-O-sulfotransferase 1 [Source:HGNC Symbol;Acc:HGNC:24240]
ENSG00000108960	31.4194	179.618	MMD	-2.5152	6.25e-26	7.92e-24	MMD	monocyte to macrophage differentiation associated [Source:HGNC Symbol;Acc:HGNC:7153]
ENSG00000074370	5.11688	28.3003	ATP2A3	-2.4675	3.57e-05	0.00056614	ATP2A3	ATPase sarcoplasmic/endoplasmic reticulum Ca2+ transporting 3 [Source:HGNC Symbol;Acc:HGNC:813]
ENSG00000169169	3.8601	21.3036	CPT1C	-2.4644	0.00033893	0.0041463	CPT1C	carnitine palmitoyltransferase 1C [Source:HGNC Symbol;Acc:HGNC:18540]
ENSG00000108846	201.982	1113.42	ABCC3	-2.4627	6.19e-148	1e-144	ABCC3	ATP binding cassette subfamily C member 3 [Source:HGNC Symbol;Acc:HGNC:54]
ENSG00000134070	23.9685	131.79	IRAK2	-2.459	5.49e-19	4.38e-17	IRAK2	interleukin 1 receptor associated kinase 2 [Source:HGNC Symbol;Acc:HGNC:6113]
ENSG00000111261	4.84757	26.6295	MANSC1	-2.4577	6.33e-05	0.00094261	MANSC1	MANSC domain containing 1 [Source:HGNC Symbol;Acc:HGNC:25505]
ENSG00000110628	9.5156	52.2146	SLC22A18	-2.4561	2.15e-08	6.04e-07	SLC22A18	solute carrier family 22 member 18 [Source:HGNC Symbol;Acc:HGNC:10964]
ENSG00000158769	7.80997	42.7116	F11R	-2.4512	4.23e-07	9.67e-06	F11R	F11 receptor [Source:HGNC Symbol;Acc:HGNC:14685]
ENSG00000011422	11.311	60.8823	PLAUR	-2.4283	1.91e-09	6.09e-08	PLAUR	plasminogen activator, urokinase receptor [Source:HGNC Symbol;Acc:HGNC:9053]
ENSG00000146166	4.66803	25.063	LGSN	-2.4247	0.00011824	0.0016563	LGSN	lengsin, lens protein with glutamine synthetase domain [Source:HGNC Symbol;Acc:HGNC:21016]
ENSG00000138821	20.3777	109.337	SLC39A8	-2.4237	9.05e-16	5.56e-14	SLC39A8	solute carrier family 39 member 8 [Source:HGNC Symbol;Acc:HGNC:20862]
ENSG00000022567	19.3005	103.489	SLC45A4	-2.4228	5.31e-15	3.05e-13	SLC45A4	solute carrier family 45 member 4 [Source:HGNC Symbol;Acc:HGNC:29196]
ENSG00000166387	8.97698	47.5153	PPFIBP2	-2.4041	1.34e-07	3.28e-06	PPFIBP2	PPFIA binding protein 2 [Source:HGNC Symbol;Acc:HGNC:9250]
ENSG00000187134	238.698	1250.12	AKR1C1	-2.3888	5.01e-160	8.83e-157	AKR1C1	aldo-keto reductase family 1 member C1 [Source:HGNC Symbol;Acc:HGNC:384]
ENSG00000106537	7.89974	40.8318	TSPAN13	-2.3698	1.25e-06	2.63e-05	TSPAN13	tetraspanin 13 [Source:HGNC Symbol;Acc:HGNC:21643]
ENSG00000132359	4.48849	23.0789	RAP1GAP2	-2.3623	0.00027604	0.0034777	RAP1GAP2	RAP1 GTPase activating protein 2 [Source:HGNC Symbol;Acc:HGNC:29176]
ENSG00000108375	7.80997	39.9964	RNF43	-2.3565	1.75e-06	3.57e-05	RNF43	ring finger protein 43 [Source:HGNC Symbol;Acc:HGNC:18505]
ENSG00000027697	30.1627	153.615	IFNGR1	-2.3485	8.79e-21	8.24e-19	IFNGR1	interferon gamma receptor 1 [Source:HGNC Symbol;Acc:HGNC:5439]
ENSG00000187634	23.4299	118.945	SAMD11	-2.3439	2.08e-16	1.37e-14	SAMD11	sterile alpha motif domain containing 11 [Source:HGNC Symbol;Acc:HGNC:28706]
ENSG00000105699	5.56573	28.1959	LSR	-2.3408	6.4e-05	0.00095207	LSR	lipolysis stimulated lipoprotein receptor [Source:HGNC Symbol;Acc:HGNC:29572]
ENSG00000148344	95.156	479.435	PTGES	-2.333	8.1e-61	3.74e-58	PTGES	prostaglandin E synthase [Source:HGNC Symbol;Acc:HGNC:9599]
ENSG00000153029	7.18158	36.1325	MR1	-2.3309	6.37e-06	0.00011718	MR1	major histocompatibility complex, class I-related [Source:HGNC Symbol;Acc:HGNC:4975]
ENSG00000163110	133.937	668.661	PDLIM5	-2.3197	1.6e-83	1.19e-80	PDLIM5	PDZ and LIM domain 5 [Source:HGNC Symbol;Acc:HGNC:17468]
ENSG00000167964	7.54066	37.5945	RAB26	-2.3178	4.47e-06	8.49e-05	RAB26	RAB26, member RAS oncogene family [Source:HGNC Symbol;Acc:HGNC:14259]
ENSG00000180287	5.20665	25.8985	PLD5	-2.3144	0.00014195	0.0019273	PLD5	phospholipase D family member 5 [Source:HGNC Symbol;Acc:HGNC:26879]
ENSG00000065325	10.0542	49.9172	GLP2R	-2.3117	1.3e-07	3.21e-06	GLP2R	glucagon like peptide 2 receptor [Source:HGNC Symbol;Acc:HGNC:4325]
ENSG00000087076	15.3506	76.0245	HSD17B14	-2.3082	7.62e-11	2.88e-09	HSD17B14	hydroxysteroid 17-beta dehydrogenase 14 [Source:HGNC Symbol;Acc:HGNC:23238]
ENSG00000142235	9.42583	46.5755	LMTK3	-2.3049	3.59e-07	8.31e-06	LMTK3	lemur tyrosine kinase 3 [Source:HGNC Symbol;Acc:HGNC:19295]
ENSG00000254166	5.6555	27.7782	CASC19	-2.2962	8.81e-05	0.0012717	CASC19	cancer susceptibility 19 (non-protein coding) [Source:HGNC Symbol;Acc:HGNC:49476]
ENSG00000135127	7.27135	35.6104	BICDL1	-2.292	9.22e-06	0.0001641	BICDL1	BICD family like cargo adaptor 1 [Source:HGNC Symbol;Acc:HGNC:28095]
ENSG00000166311	6.46343	31.6421	SMPD1	-2.2915	2.92e-05	0.00047424	SMPD1	sphingomyelin phosphodiesterase 1 [Source:HGNC Symbol;Acc:HGNC:11120]
ENSG00000095739	20.1982	98.0591	BAMBI	-2.2794	2.23e-13	1.09e-11	BAMBI	BMP and activin membrane bound inhibitor [Source:HGNC Symbol;Acc:HGNC:30251]
ENSG00000160326	25.5844	123.435	SLC2A6	-2.2704	2.24e-16	1.47e-14	SLC2A6	solute carrier family 2 member 6 [Source:HGNC Symbol;Acc:HGNC:11011]
ENSG00000169855	16.1586	77.4865	ROBO1	-2.2616	8.71e-11	3.29e-09	ROBO1	roundabout guidance receptor 1 [Source:HGNC Symbol;Acc:HGNC:10249]
ENSG00000012171	10.7724	51.3792	SEMA3B	-2.2538	1.35e-07	3.31e-06	SEMA3B	semaphorin 3B [Source:HGNC Symbol;Acc:HGNC:10724]
ENSG00000151632	860.713	4057.18	AKR1C2	-2.2369	0	0	AKR1C2	aldo-keto reductase family 1 member C2 [Source:HGNC Symbol;Acc:HGNC:385]
ENSG00000149380	7.27135	34.2528	P4HA3	-2.2359	1.85e-05	0.0003105	P4HA3	prolyl 4-hydroxylase subunit alpha 3 [Source:HGNC Symbol;Acc:HGNC:30135]
ENSG00000011028	49.7325	233.713	MRC2	-2.2325	5.32e-29	7.7e-27	MRC2	mannose receptor C type 2 [Source:HGNC Symbol;Acc:HGNC:16875]
ENSG00000165389	100.273	468.887	SPTSSA	-2.2253	3.14e-56	1.35e-53	SPTSSA	serine palmitoyltransferase small subunit A [Source:HGNC Symbol;Acc:HGNC:20361]
ENSG00000165105	11.6701	54.4077	RASEF	-2.221	7.67e-08	1.96e-06	RASEF	RAS and EF-hand domain containing [Source:HGNC Symbol;Acc:HGNC:26464]
ENSG00000145920	407.286	1890.27	CPLX2	-2.2145	1.2e-219	4.68e-216	CPLX2	complexin 2 [Source:HGNC Symbol;Acc:HGNC:2310]
ENSG00000164171	23.2504	107.667	ITGA2	-2.2112	4.7e-14	2.48e-12	ITGA2	integrin subunit alpha 2 [Source:HGNC Symbol;Acc:HGNC:6137]
ENSG00000147872	39.768	183.9	PLIN2	-2.2092	6.95e-23	7.36e-21	PLIN2	perilipin 2 [Source:HGNC Symbol;Acc:HGNC:248]
ENSG00000186088	6.01458	27.7782	GSAP	-2.2074	0.00013047	0.0018045	GSAP	gamma-secretase activating protein [Source:HGNC Symbol;Acc:HGNC:28042]
ENSG00000185215	262.487	1211.28	TNFAIP2	-2.2062	8.79e-141	1.31e-137	TNFAIP2	TNF alpha induced protein 2 [Source:HGNC Symbol;Acc:HGNC:11895]
ENSG00000129354	7.00204	32.1642	AP1M2	-2.1996	4e-05	0.00062343	AP1M2	adaptor related protein complex 1 mu 2 subunit [Source:HGNC Symbol;Acc:HGNC:558]
ENSG00000268621	18.6721	85.7364	IGFL2-AS1	-2.199	2.02e-11	8.12e-10	IGFL2-AS1	IGFL2 antisense RNA 1 [Source:HGNC Symbol;Acc:HGNC:52559]
ENSG00000169903	12.3882	56.6007	TM4SF4	-2.1918	5.44e-08	1.43e-06	TM4SF4	transmembrane 4 L six family member 4 [Source:HGNC Symbol;Acc:HGNC:11856]
ENSG00000159167	7.80997	35.6104	STC1	-2.1889	1.65e-05	0.000279	STC1	stanniocalcin 1 [Source:HGNC Symbol;Acc:HGNC:11373]
ENSG00000068366	45.7826	208.65	ACSL4	-2.1882	1.87e-25	2.29e-23	ACSL4	acyl-CoA synthetase long chain family member 4 [Source:HGNC Symbol;Acc:HGNC:3571]
ENSG00000172216	70.0204	317.361	CEBPB	-2.1803	1.11e-37	2.37e-35	CEBPB	CCAAT/enhancer binding protein beta [Source:HGNC Symbol;Acc:HGNC:1834]
ENSG00000145819	20.1084	91.0623	ARHGAP26	-2.1791	6.43e-12	2.67e-10	ARHGAP26	Rho GTPase activating protein 26 [Source:HGNC Symbol;Acc:HGNC:17073]
ENSG00000198682	32.5864	147.559	PAPSS2	-2.1789	2.24e-18	1.71e-16	PAPSS2	3'-phosphoadenosine 5'-phosphosulfate synthase 2 [Source:HGNC Symbol;Acc:HGNC:8604]
ENSG00000105514	5.83504	26.3162	RAB3D	-2.1731	0.0002273	0.0029303	RAB3D	RAB3D, member RAS oncogene family [Source:HGNC Symbol;Acc:HGNC:9779]
ENSG00000137767	10.3235	46.3666	SQOR	-2.1671	1.04e-06	2.22e-05	SQOR	sulfide quinone oxidoreductase [Source:HGNC Symbol;Acc:HGNC:20390]
ENSG00000115828	28.5468	128.135	QPCT	-2.1663	4.72e-16	2.98e-14	QPCT	glutaminyl-peptide cyclotransferase [Source:HGNC Symbol;Acc:HGNC:9753]
ENSG00000122861	41.2941	184.109	PLAU	-2.1566	2.91e-22	3.02e-20	PLAU	plasminogen activator, urokinase [Source:HGNC Symbol;Acc:HGNC:9052]
ENSG00000113916	6.91228	30.8066	BCL6	-2.156	7.23e-05	0.0010704	BCL6	B-cell CLL/lymphoma 6 [Source:HGNC Symbol;Acc:HGNC:1001]
ENSG00000120256	16.0688	71.3252	LRP11	-2.1502	1.66e-09	5.32e-08	LRP11	LDL receptor related protein 11 [Source:HGNC Symbol;Acc:HGNC:16936]
ENSG00000103227	5.56573	24.6453	LMF1	-2.1467	0.00040071	0.004814	LMF1	lipase maturation factor 1 [Source:HGNC Symbol;Acc:HGNC:14154]
ENSG00000181449	5.83504	25.794	SOX2	-2.1442	0.00029631	0.0036806	SOX2	SRY-box 2 [Source:HGNC Symbol;Acc:HGNC:11195]
ENSG00000117984	63.8263	280.81	CTSD	-2.1374	9.85e-33	1.62e-30	CTSD	cathepsin D [Source:HGNC Symbol;Acc:HGNC:2529]
ENSG00000173801	127.742	558.592	JUP	-2.1286	4.67e-63	2.39e-60	JUP	junction plakoglobin [Source:HGNC Symbol;Acc:HGNC:6207]
ENSG00000101255	48.5655	211.991	TRIB3	-2.126	5.91e-25	7.08e-23	TRIB3	tribbles pseudokinase 3 [Source:HGNC Symbol;Acc:HGNC:16228]
ENSG00000101076	10.9519	47.4109	HNF4A	-2.114	1.17e-06	2.47e-05	HNF4A	hepatocyte nuclear factor 4 alpha [Source:HGNC Symbol;Acc:HGNC:5024]
ENSG00000021355	26.8412	115.081	SERPINB1	-2.1001	4.67e-14	2.47e-12	SERPINB1	serpin family B member 1 [Source:HGNC Symbol;Acc:HGNC:3311]
ENSG00000163083	12.8371	54.9298	INHBB	-2.0973	1.94e-07	4.66e-06	INHBB	inhibin beta B subunit [Source:HGNC Symbol;Acc:HGNC:6067]
ENSG00000164136	6.19412	26.3162	IL15	-2.087	0.00032925	0.004038	IL15	interleukin 15 [Source:HGNC Symbol;Acc:HGNC:5977]
ENSG00000164733	276.042	1171.8	CTSB	-2.0858	7.13e-127	8.14e-124	CTSB	cathepsin B [Source:HGNC Symbol;Acc:HGNC:2527]
ENSG00000161249	6.91228	29.2402	DMKN	-2.0807	0.00015814	0.0021205	DMKN	dermokine [Source:HGNC Symbol;Acc:HGNC:25063]
ENSG00000184500	15.7995	66.1037	PROS1	-2.0649	1.59e-08	4.54e-07	PROS1	protein S (alpha) [Source:HGNC Symbol;Acc:HGNC:9456]
ENSG00000196352	27.1105	113.41	CD55	-2.0646	1.34e-13	6.68e-12	CD55	CD55 molecule (Cromer blood group) [Source:HGNC Symbol;Acc:HGNC:2665]
ENSG00000102181	85.2813	356.208	CD99L2	-2.0624	2.86e-39	6.62e-37	CD99L2	CD99 molecule like 2 [Source:HGNC Symbol;Acc:HGNC:18237]
ENSG00000074964	8.6179	35.6104	ARHGEF10L	-2.0469	3.72e-05	0.00058468	ARHGEF10L	Rho guanine nucleotide exchange factor 10 like [Source:HGNC Symbol;Acc:HGNC:25540]
ENSG00000163694	26.3923	108.815	RBM47	-2.0437	5.93e-13	2.75e-11	RBM47	RNA binding motif protein 47 [Source:HGNC Symbol;Acc:HGNC:30358]
ENSG00000151491	36.7159	151.005	EPS8	-2.0401	2.36e-17	1.69e-15	EPS8	epidermal growth factor receptor pathway substrate 8 [Source:HGNC Symbol;Acc:HGNC:3420]
ENSG00000167861	9.96445	40.7274	HID1	-2.0311	1.14e-05	0.0002006	HID1	HID1 domain containing [Source:HGNC Symbol;Acc:HGNC:15736]
ENSG00000140479	7.80997	31.8509	PCSK6	-2.0279	0.00010598	0.0015009	PCSK6	proprotein convertase subtilisin/kexin type 6 [Source:HGNC Symbol;Acc:HGNC:8569]
ENSG00000166750	17.6847	71.9518	SLFN5	-2.0245	5.89e-09	1.77e-07	SLFN5	schlafen family member 5 [Source:HGNC Symbol;Acc:HGNC:28286]
ENSG00000064687	13.9143	56.4962	ABCA7	-2.0216	2.58e-07	6.05e-06	ABCA7	ATP binding cassette subfamily A member 7 [Source:HGNC Symbol;Acc:HGNC:37]
ENSG00000196557	17.146	69.5499	CACNA1H	-2.0202	1.11e-08	3.23e-07	CACNA1H	calcium voltage-gated channel subunit alpha1 H [Source:HGNC Symbol;Acc:HGNC:1395]
ENSG00000187446	73.1624	296.475	CHP1	-2.0187	4.31e-32	6.96e-30	CHP1	calcineurin like EF-hand protein 1 [Source:HGNC Symbol;Acc:HGNC:17433]
ENSG00000100906	68.3148	276.738	NFKBIA	-2.0182	4.66e-30	7.01e-28	NFKBIA	NFKB inhibitor alpha [Source:HGNC Symbol;Acc:HGNC:7797]
ENSG00000156510	29.0854	117.692	HKDC1	-2.0166	1.14e-13	5.74e-12	HKDC1	hexokinase domain containing 1 [Source:HGNC Symbol;Acc:HGNC:23302]
ENSG00000063180	12.0292	48.5596	CA11	-2.0132	1.91e-06	3.86e-05	CA11	carbonic anhydrase 11 [Source:HGNC Symbol;Acc:HGNC:1370]
ENSG00000132639	26.7514	107.353	SNAP25	-2.0047	1.64e-12	7.29e-11	SNAP25	synaptosome associated protein 25 [Source:HGNC Symbol;Acc:HGNC:11132]
ENSG00000179403	14.0939	56.183	VWA1	-1.9951	3.54e-07	8.19e-06	VWA1	von Willebrand factor A domain containing 1 [Source:HGNC Symbol;Acc:HGNC:30910]
ENSG00000089351	133.757	531.858	GRAMD1A	-1.9914	3.28e-55	1.35e-52	GRAMD1A	GRAM domain containing 1A [Source:HGNC Symbol;Acc:HGNC:29305]
ENSG00000111275	50.8995	201.862	ALDH2	-1.9876	6.04e-22	6.14e-20	ALDH2	aldehyde dehydrogenase 2 family (mitochondrial) [Source:HGNC Symbol;Acc:HGNC:404]
ENSG00000111912	66.1603	261.804	NCOA7	-1.9844	6.36e-28	8.81e-26	NCOA7	nuclear receptor coactivator 7 [Source:HGNC Symbol;Acc:HGNC:21081]
ENSG00000106665	25.2253	99.73	CLIP2	-1.9832	1.4e-11	5.67e-10	CLIP2	CAP-Gly domain containing linker protein 2 [Source:HGNC Symbol;Acc:HGNC:2586]
ENSG00000150630	7.89974	31.1199	VEGFC	-1.978	0.00016453	0.002194	VEGFC	vascular endothelial growth factor C [Source:HGNC Symbol;Acc:HGNC:12682]
ENSG00000158856	30.9706	121.556	DMTN	-1.9726	1.06e-13	5.35e-12	DMTN	dematin actin binding protein [Source:HGNC Symbol;Acc:HGNC:3382]
ENSG00000073350	34.4716	135.131	LLGL2	-1.9709	4.76e-15	2.75e-13	LLGL2	LLGL2, scribble cell polarity complex component [Source:HGNC Symbol;Acc:HGNC:6629]
ENSG00000142102	22.7118	88.3472	PGGHG	-1.9597	2.8e-10	9.89e-09	PGGHG	protein-glucosylgalactosylhydroxylysine glucosidase [Source:HGNC Symbol;Acc:HGNC:26210]
ENSG00000167642	137.348	531.127	SPINT2	-1.9512	1.1e-53	4.28e-51	SPINT2	serine peptidase inhibitor, Kunitz type 2 [Source:HGNC Symbol;Acc:HGNC:11247]
ENSG00000164300	24.8662	95.9705	SERINC5	-1.9484	5.76e-11	2.2e-09	SERINC5	serine incorporator 5 [Source:HGNC Symbol;Acc:HGNC:18825]
ENSG00000125848	9.96445	38.3255	FLRT3	-1.9434	3.6e-05	0.00056938	FLRT3	fibronectin leucine rich transmembrane protein 3 [Source:HGNC Symbol;Acc:HGNC:3762]
ENSG00000120899	10.144	38.9521	PTK2B	-1.9411	3.15e-05	0.00050738	PTK2B	protein tyrosine kinase 2 beta [Source:HGNC Symbol;Acc:HGNC:9612]
ENSG00000050165	11.7598	45.009	DKK3	-1.9363	7.95e-06	0.00014335	DKK3	dickkopf WNT signaling pathway inhibitor 3 [Source:HGNC Symbol;Acc:HGNC:2893]
ENSG00000146278	24.1481	92.1066	PNRC1	-1.9314	1.79e-10	6.45e-09	PNRC1	proline rich nuclear receptor coactivator 1 [Source:HGNC Symbol;Acc:HGNC:17278]
ENSG00000105711	12.7473	48.5596	SCN1B	-1.9296	3.69e-06	7.09e-05	SCN1B	sodium voltage-gated channel beta subunit 1 [Source:HGNC Symbol;Acc:HGNC:10586]
ENSG00000121895	13.3757	50.8571	TMEM156	-1.9268	2.22e-06	4.44e-05	TMEM156	transmembrane protein 156 [Source:HGNC Symbol;Acc:HGNC:26260]
ENSG00000115414	341.664	1294.4	FN1	-1.9216	1.43e-125	1.46e-122	FN1	fibronectin 1 [Source:HGNC Symbol;Acc:HGNC:3778]
ENSG00000064651	59.3378	224.21	SLC12A2	-1.9178	4e-23	4.32e-21	SLC12A2	solute carrier family 12 member 2 [Source:HGNC Symbol;Acc:HGNC:10911]
ENSG00000128342	58.2606	220.137	LIF	-1.9178	9.85e-23	1.04e-20	LIF	LIF, interleukin 6 family cytokine [Source:HGNC Symbol;Acc:HGNC:6596]
ENSG00000135919	40.6657	152.884	SERPINE2	-1.9106	3.44e-16	2.2e-14	SERPINE2	serpin family E member 2 [Source:HGNC Symbol;Acc:HGNC:8951]
ENSG00000128274	7.7202	28.8225	A4GALT	-1.9005	0.00041771	0.0049879	A4GALT	alpha 1,4-galactosyltransferase (P blood group) [Source:HGNC Symbol;Acc:HGNC:18149]
ENSG00000196975	207.278	771.628	ANXA4	-1.8963	2.79e-74	1.87e-71	ANXA4	annexin A4 [Source:HGNC Symbol;Acc:HGNC:542]
ENSG00000187720	70.2	260.864	THSD4	-1.8938	3.3e-26	4.24e-24	THSD4	thrombospondin type 1 domain containing 4 [Source:HGNC Symbol;Acc:HGNC:25835]
ENSG00000162337	58.3504	216.795	LRP5	-1.8935	4.75e-22	4.88e-20	LRP5	LDL receptor related protein 5 [Source:HGNC Symbol;Acc:HGNC:6697]
ENSG00000068079	10.3235	38.1167	IFI35	-1.8845	5.48e-05	0.00082991	IFI35	interferon induced protein 35 [Source:HGNC Symbol;Acc:HGNC:5399]
ENSG00000186815	43.3588	159.881	TPCN1	-1.8826	1.5e-16	9.91e-15	TPCN1	two pore segment channel 1 [Source:HGNC Symbol;Acc:HGNC:18182]
ENSG00000184371	45.6031	167.505	CSF1	-1.877	3.34e-17	2.35e-15	CSF1	colony stimulating factor 1 [Source:HGNC Symbol;Acc:HGNC:2432]
ENSG00000158825	11.2212	41.1451	CDA	-1.8745	2.97e-05	0.00048092	CDA	cytidine deaminase [Source:HGNC Symbol;Acc:HGNC:1712]
ENSG00000072422	17.5051	64.1196	RHOBTB1	-1.873	1.89e-07	4.54e-06	RHOBTB1	Rho related BTB domain containing 1 [Source:HGNC Symbol;Acc:HGNC:18738]
ENSG00000231925	47.2189	172.308	TAPBP	-1.8676	1.54e-17	1.12e-15	TAPBP	TAP binding protein [Source:HGNC Symbol;Acc:HGNC:11566]
ENSG00000221869	29.0854	106.1	CEBPD	-1.8671	2.27e-11	9.1e-10	CEBPD	CCAAT/enhancer binding protein delta [Source:HGNC Symbol;Acc:HGNC:1835]
ENSG00000158467	20.6471	75.2935	AHCYL2	-1.8666	1.78e-08	5.04e-07	AHCYL2	adenosylhomocysteinase like 2 [Source:HGNC Symbol;Acc:HGNC:22204]
ENSG00000173221	43.8974	159.255	GLRX	-1.8591	3.11e-16	2e-14	GLRX	glutaredoxin [Source:HGNC Symbol;Acc:HGNC:4330]
ENSG00000082074	9.42583	34.0439	FYB1	-1.8527	0.00016474	0.0021952	FYB1	FYN binding protein 1 [Source:HGNC Symbol;Acc:HGNC:4036]
ENSG00000166033	18.1335	65.4772	HTRA1	-1.8523	1.75e-07	4.22e-06	HTRA1	HtrA serine peptidase 1 [Source:HGNC Symbol;Acc:HGNC:9476]
ENSG00000168528	14.1836	51.0659	SERINC2	-1.8481	4.09e-06	7.8e-05	SERINC2	serine incorporator 2 [Source:HGNC Symbol;Acc:HGNC:23231]
ENSG00000110719	57.0038	203.533	TCIRG1	-1.8361	5.43e-20	4.83e-18	TCIRG1	T-cell immune regulator 1, ATPase H+ transporting V0 subunit a3 [Source:HGNC Symbol;Acc:HGNC:11647]
ENSG00000131459	18.4926	65.8949	GFPT2	-1.8332	1.96e-07	4.7e-06	GFPT2	glutamine-fructose-6-phosphate transaminase 2 [Source:HGNC Symbol;Acc:HGNC:4242]
ENSG00000025434	13.1962	46.9932	NR1H3	-1.8323	1.12e-05	0.000197	NR1H3	nuclear receptor subfamily 1 group H member 3 [Source:HGNC Symbol;Acc:HGNC:7966]
ENSG00000204580	50.4506	179.305	DDR1	-1.8295	1.03e-17	7.51e-16	DDR1	discoidin domain receptor tyrosine kinase 1 [Source:HGNC Symbol;Acc:HGNC:2730]
ENSG00000028203	34.4716	122.182	VEZT	-1.8256	1.61e-12	7.19e-11	VEZT	vezatin, adherens junctions transmembrane protein [Source:HGNC Symbol;Acc:HGNC:18258]
ENSG00000129824	21.0061	74.3536	RPS4Y1	-1.8236	3.66e-08	9.88e-07	RPS4Y1	ribosomal protein S4, Y-linked 1 [Source:HGNC Symbol;Acc:HGNC:10425]
ENSG00000132470	44.6156	157.897	ITGB4	-1.8234	1.02e-15	6.22e-14	ITGB4	integrin subunit beta 4 [Source:HGNC Symbol;Acc:HGNC:6158]
ENSG00000100284	18.7619	66.1037	TOM1	-1.8169	2.23e-07	5.32e-06	TOM1	target of myb1 membrane trafficking protein [Source:HGNC Symbol;Acc:HGNC:11982]
ENSG00000173599	16.6074	58.4804	PC	-1.8161	1.12e-06	2.38e-05	PC	pyruvate carboxylase [Source:HGNC Symbol;Acc:HGNC:8636]
ENSG00000167930	18.7619	65.8949	FAM234A	-1.8124	2.45e-07	5.78e-06	FAM234A	family with sequence similarity 234 member A [Source:HGNC Symbol;Acc:HGNC:14163]
ENSG00000118785	135.014	472.647	SPP1	-1.8077	2.57e-43	6.74e-41	SPP1	secreted phosphoprotein 1 [Source:HGNC Symbol;Acc:HGNC:11255]
ENSG00000145730	17.954	62.762	PAM	-1.8056	5.06e-07	1.14e-05	PAM	peptidylglycine alpha-amidating monooxygenase [Source:HGNC Symbol;Acc:HGNC:8596]
ENSG00000099204	35.0102	121.973	ABLIM1	-1.8007	2.74e-12	1.18e-10	ABLIM1	actin binding LIM protein 1 [Source:HGNC Symbol;Acc:HGNC:78]
ENSG00000178401	23.3401	81.246	DNAJC22	-1.7995	1.18e-08	3.44e-07	DNAJC22	DnaJ heat shock protein family (Hsp40) member C22 [Source:HGNC Symbol;Acc:HGNC:25802]
ENSG00000150782	26.3026	91.3756	IL18	-1.7966	1.54e-09	4.97e-08	IL18	interleukin 18 [Source:HGNC Symbol;Acc:HGNC:5986]
ENSG00000128016	30.1627	104.429	ZFP36	-1.7917	1.16e-10	4.27e-09	ZFP36	ZFP36 ring finger protein [Source:HGNC Symbol;Acc:HGNC:12862]
ENSG00000196139	577.22	1990.74	AKR1C3	-1.7861	1.23e-173	2.64e-170	AKR1C3	aldo-keto reductase family 1 member C3 [Source:HGNC Symbol;Acc:HGNC:386]
ENSG00000182704	207.638	716.072	TSKU	-1.786	1.2e-63	6.48e-61	TSKU	tsukushi, small leucine rich proteoglycan [Source:HGNC Symbol;Acc:HGNC:28850]
ENSG00000017797	22.1731	76.4422	RALBP1	-1.7856	3.78e-08	1.02e-06	RALBP1	ralA binding protein 1 [Source:HGNC Symbol;Acc:HGNC:9841]
ENSG00000111321	123.344	424.401	LTBR	-1.7827	2.42e-38	5.33e-36	LTBR	lymphotoxin beta receptor [Source:HGNC Symbol;Acc:HGNC:6718]
ENSG00000163435	76.035	260.655	ELF3	-1.7774	4.28e-24	4.88e-22	ELF3	E74 like ETS transcription factor 3 [Source:HGNC Symbol;Acc:HGNC:3318]
ENSG00000108679	86.8972	297.519	LGALS3BP	-1.7756	3.1e-27	4.24e-25	LGALS3BP	galectin 3 binding protein [Source:HGNC Symbol;Acc:HGNC:6564]
ENSG00000079257	23.2504	79.2618	LXN	-1.7694	2.62e-08	7.24e-07	LXN	latexin [Source:HGNC Symbol;Acc:HGNC:13347]
ENSG00000135318	18.1335	61.3	NT5E	-1.7572	1.12e-06	2.38e-05	NT5E	5'-nucleotidase ecto [Source:HGNC Symbol;Acc:HGNC:8021]
ENSG00000133466	16.787	56.7051	C1QTNF6	-1.7561	2.84e-06	5.56e-05	C1QTNF6	C1q and TNF related 6 [Source:HGNC Symbol;Acc:HGNC:14343]
ENSG00000143819	129.089	435.157	EPHX1	-1.7532	2.2e-38	4.9e-36	EPHX1	epoxide hydrolase 1 [Source:HGNC Symbol;Acc:HGNC:3401]
ENSG00000047644	21.8141	73.5182	WWC3	-1.7528	1.02e-07	2.55e-06	WWC3	WWC family member 3 [Source:HGNC Symbol;Acc:HGNC:29237]
ENSG00000111077	17.6847	59.5247	TNS2	-1.751	1.7e-06	3.47e-05	TNS2	tensin 2 [Source:HGNC Symbol;Acc:HGNC:19737]
ENSG00000260916	13.1962	44.278	CCPG1	-1.7465	3.78e-05	0.0005919	CCPG1	cell cycle progression 1 [Source:HGNC Symbol;Acc:HGNC:24227]
ENSG00000183779	23.5197	78.8441	ZNF703	-1.7451	3.89e-08	1.04e-06	ZNF703	zinc finger protein 703 [Source:HGNC Symbol;Acc:HGNC:25883]
ENSG00000060656	25.3151	84.3789	PTPRU	-1.7369	1.46e-08	4.19e-07	PTPRU	protein tyrosine phosphatase, receptor type U [Source:HGNC Symbol;Acc:HGNC:9683]
ENSG00000070081	24.8662	82.708	NUCB2	-1.7338	2.11e-08	5.95e-07	NUCB2	nucleobindin 2 [Source:HGNC Symbol;Acc:HGNC:8044]
ENSG00000125746	19.3903	64.4329	EML2	-1.7325	7.73e-07	1.68e-05	EML2	echinoderm microtubule associated protein like 2 [Source:HGNC Symbol;Acc:HGNC:18035]
ENSG00000007255	26.2128	86.4674	TRAPPC6A	-1.7219	1.2e-08	3.48e-07	TRAPPC6A	trafficking protein particle complex 6A [Source:HGNC Symbol;Acc:HGNC:23069]
ENSG00000145901	120.92	398.607	TNIP1	-1.7209	2.04e-34	3.57e-32	TNIP1	TNFAIP3 interacting protein 1 [Source:HGNC Symbol;Acc:HGNC:16903]
ENSG00000054793	22.9811	75.7112	ATP9A	-1.7201	9.85e-08	2.47e-06	ATP9A	ATPase phospholipid transporting 9A (putative) [Source:HGNC Symbol;Acc:HGNC:13540]
ENSG00000137331	64.6343	212.827	IER3	-1.7193	4.14e-19	3.38e-17	IER3	immediate early response 3 [Source:HGNC Symbol;Acc:HGNC:5392]
ENSG00000145623	60.7742	199.982	OSMR	-1.7183	4.9e-18	3.71e-16	OSMR	oncostatin M receptor [Source:HGNC Symbol;Acc:HGNC:8507]
ENSG00000197355	18.313	60.1513	UAP1L1	-1.7157	2.12e-06	4.25e-05	UAP1L1	UDP-N-acetylglucosamine pyrophosphorylase 1 like 1 [Source:HGNC Symbol;Acc:HGNC:28082]
ENSG00000157399	28.3673	92.9421	ARSE	-1.7121	3.98e-09	1.22e-07	ARSE	arylsulfatase E (chondrodysplasia punctata 1) [Source:HGNC Symbol;Acc:HGNC:719]
ENSG00000130066	260.243	851.83	SAT1	-1.7107	5.91e-71	3.47e-68	SAT1	spermidine/spermine N1-acetyltransferase 1 [Source:HGNC Symbol;Acc:HGNC:10540]
ENSG00000023445	33.2148	108.711	BIRC3	-1.7106	2.01e-10	7.21e-09	BIRC3	baculoviral IAP repeat containing 3 [Source:HGNC Symbol;Acc:HGNC:591]
ENSG00000130203	15.7995	51.5881	APOE	-1.7072	1.21e-05	0.00021173	APOE	apolipoprotein E [Source:HGNC Symbol;Acc:HGNC:613]
ENSG00000154529	62.0309	201.34	CNTNAP3B	-1.6986	7.15e-18	5.27e-16	CNTNAP3B	contactin associated protein like 3B [Source:HGNC Symbol;Acc:HGNC:32035]
ENSG00000197081	45.4235	147.35	IGF2R	-1.6977	1.77e-13	8.72e-12	IGF2R	insulin like growth factor 2 receptor [Source:HGNC Symbol;Acc:HGNC:5467]
ENSG00000186529	12.2985	39.7876	CYP4F3	-1.6938	0.00013311	0.0018329	CYP4F3	cytochrome P450 family 4 subfamily F member 3 [Source:HGNC Symbol;Acc:HGNC:2646]
ENSG00000177606	66.2501	213.976	JUN	-1.6915	8.63e-19	6.73e-17	JUN	Jun proto-oncogene, AP-1 transcription factor subunit [Source:HGNC Symbol;Acc:HGNC:6204]
ENSG00000134107	106.467	343.468	BHLHE40	-1.6898	3.78e-29	5.59e-27	BHLHE40	basic helix-loop-helix family member e40 [Source:HGNC Symbol;Acc:HGNC:1046]
ENSG00000074416	49.5529	158.524	MGLL	-1.6777	3.64e-14	1.95e-12	MGLL	monoglyceride lipase [Source:HGNC Symbol;Acc:HGNC:17038]
ENSG00000106351	14.1836	45.1134	AGFG2	-1.6693	5.69e-05	0.00085677	AGFG2	ArfGAP with FG repeats 2 [Source:HGNC Symbol;Acc:HGNC:5177]
ENSG00000091490	32.9455	104.743	SEL1L3	-1.6687	8.69e-10	2.9e-08	SEL1L3	SEL1L family member 3 [Source:HGNC Symbol;Acc:HGNC:29108]
ENSG00000105612	16.6972	53.0501	DNASE2	-1.6677	1.29e-05	0.00022392	DNASE2	deoxyribonuclease 2, lysosomal [Source:HGNC Symbol;Acc:HGNC:2960]
ENSG00000088992	57.0936	181.185	TESC	-1.6661	7.92e-16	4.88e-14	TESC	tescalcin [Source:HGNC Symbol;Acc:HGNC:26065]
ENSG00000010704	12.3882	39.2654	HFE	-1.6643	0.000179	0.0023584	HFE	hemochromatosis [Source:HGNC Symbol;Acc:HGNC:4886]
ENSG00000143162	75.2271	237.472	CREG1	-1.6584	3.88e-20	3.5e-18	CREG1	cellular repressor of E1A stimulated genes 1 [Source:HGNC Symbol;Acc:HGNC:2351]
ENSG00000182022	11.7598	37.0724	CHST15	-1.6565	0.00028536	0.0035673	CHST15	carbohydrate sulfotransferase 15 [Source:HGNC Symbol;Acc:HGNC:18137]
ENSG00000172830	20.288	63.8063	SSH3	-1.6531	2.01e-06	4.05e-05	SSH3	slingshot protein phosphatase 3 [Source:HGNC Symbol;Acc:HGNC:30581]
ENSG00000100031	52.9642	165.938	GGT1	-1.6476	2.07e-14	1.13e-12	GGT1	gamma-glutamyltransferase 1 [Source:HGNC Symbol;Acc:HGNC:4250]
ENSG00000130513	183.759	574.988	GDF15	-1.6457	6.62e-46	2.04e-43	GDF15	growth differentiation factor 15 [Source:HGNC Symbol;Acc:HGNC:30142]
ENSG00000082014	15.7097	48.8729	SMARCD3	-1.6374	3.62e-05	0.0005726	SMARCD3	SWI/SNF related, matrix associated, actin dependent regulator of chromatin, subfamily d, member 3 [Source:HGNC Symbol;Acc:HGNC:11108]
ENSG00000162458	19.121	59.4203	FBLIM1	-1.6358	5.34e-06	0.00010042	FBLIM1	filamin binding LIM protein 1 [Source:HGNC Symbol;Acc:HGNC:24686]
ENSG00000165650	48.8348	151.214	PDZD8	-1.6306	4.38e-13	2.07e-11	PDZD8	PDZ domain containing 8 [Source:HGNC Symbol;Acc:HGNC:26974]
ENSG00000100644	194.8	602.975	HIF1A	-1.6301	2.09e-47	6.98e-45	HIF1A	hypoxia inducible factor 1 alpha subunit [Source:HGNC Symbol;Acc:HGNC:4910]
ENSG00000112378	108.262	335.114	PERP	-1.6301	4.23e-27	5.66e-25	PERP	PERP, TP53 apoptosis effector [Source:HGNC Symbol;Acc:HGNC:17637]
ENSG00000109861	64.5445	198.52	CTSC	-1.6209	1.42e-16	9.52e-15	CTSC	cathepsin C [Source:HGNC Symbol;Acc:HGNC:2528]
ENSG00000117305	12.2087	37.4901	HMGCL	-1.6186	0.00033478	0.0040981	HMGCL	3-hydroxymethyl-3-methylglutaryl-CoA lyase [Source:HGNC Symbol;Acc:HGNC:5005]
ENSG00000163814	19.3903	59.5247	CDCP1	-1.6182	6.22e-06	0.00011489	CDCP1	CUB domain containing protein 1 [Source:HGNC Symbol;Acc:HGNC:24357]
ENSG00000116133	65.4422	199.982	DHCR24	-1.6116	1.49e-16	9.87e-15	DHCR24	24-dehydrocholesterol reductase [Source:HGNC Symbol;Acc:HGNC:2859]
ENSG00000100299	13.9143	42.5027	ARSA	-1.611	0.00014141	0.0019227	ARSA	arylsulfatase A [Source:HGNC Symbol;Acc:HGNC:713]
ENSG00000168264	64.8138	197.685	IRF2BP2	-1.6088	2.41e-16	1.57e-14	IRF2BP2	interferon regulatory factor 2 binding protein 2 [Source:HGNC Symbol;Acc:HGNC:21729]
ENSG00000113140	19.121	58.2715	SPARC	-1.6076	8.62e-06	0.00015441	SPARC	secreted protein acidic and cysteine rich [Source:HGNC Symbol;Acc:HGNC:11219]
ENSG00000151726	19.3903	58.8981	ACSL1	-1.6029	8.07e-06	0.00014545	ACSL1	acyl-CoA synthetase long chain family member 1 [Source:HGNC Symbol;Acc:HGNC:3569]
ENSG00000108784	36.267	109.755	NAGLU	-1.5976	1.22e-09	4e-08	NAGLU	N-acetyl-alpha-glucosaminidase [Source:HGNC Symbol;Acc:HGNC:7632]
ENSG00000067113	16.2483	48.9773	PLPP1	-1.5918	5.14e-05	0.00078275	PLPP1	phospholipid phosphatase 1 [Source:HGNC Symbol;Acc:HGNC:9228]
ENSG00000099194	843.387	2538.88	SCD	-1.5899	9.08e-187	2.2e-183	SCD	stearoyl-CoA desaturase [Source:HGNC Symbol;Acc:HGNC:10571]
ENSG00000140564	53.3233	160.403	FURIN	-1.5889	2.53e-13	1.23e-11	FURIN	furin, paired basic amino acid cleaving enzyme [Source:HGNC Symbol;Acc:HGNC:8568]
ENSG00000186594	21.9038	65.7904	MIR22HG	-1.5867	2.85e-06	5.56e-05	MIR22HG	MIR22 host gene [Source:HGNC Symbol;Acc:HGNC:28219]
ENSG00000138162	57.0038	171.16	TACC2	-1.5862	4.37e-14	2.32e-12	TACC2	transforming acidic coiled-coil containing protein 2 [Source:HGNC Symbol;Acc:HGNC:11523]
ENSG00000141934	49.8222	149.438	PLPP2	-1.5847	1.8e-12	7.92e-11	PLPP2	phospholipid phosphatase 2 [Source:HGNC Symbol;Acc:HGNC:9230]
ENSG00000177706	17.3256	51.9014	FAM20C	-1.5829	3.32e-05	0.00053008	FAM20C	FAM20C, golgi associated secretory pathway kinase [Source:HGNC Symbol;Acc:HGNC:22140]
ENSG00000144746	41.3839	122.809	ARL6IP5	-1.5693	2.25e-10	8.01e-09	ARL6IP5	ADP ribosylation factor like GTPase 6 interacting protein 5 [Source:HGNC Symbol;Acc:HGNC:16937]
ENSG00000247556	51.6176	152.676	OIP5-AS1	-1.5645	1.7e-12	7.53e-11	OIP5-AS1	OIP5 antisense RNA 1 [Source:HGNC Symbol;Acc:HGNC:43563]
ENSG00000054983	19.9289	58.8981	GALC	-1.5634	1.18e-05	0.00020698	GALC	galactosylceramidase [Source:HGNC Symbol;Acc:HGNC:4115]
ENSG00000130522	71.9954	212.305	JUND	-1.5602	1e-16	6.79e-15	JUND	JunD proto-oncogene, AP-1 transcription factor subunit [Source:HGNC Symbol;Acc:HGNC:6206]
ENSG00000197324	114.726	337.933	LRP10	-1.5585	1.2e-25	1.5e-23	LRP10	LDL receptor related protein 10 [Source:HGNC Symbol;Acc:HGNC:14553]
ENSG00000086062	171.999	503.767	B4GALT1	-1.5504	3.91e-37	8.07e-35	B4GALT1	beta-1,4-galactosyltransferase 1 [Source:HGNC Symbol;Acc:HGNC:924]
ENSG00000175274	28.6366	83.5434	TP53I11	-1.5447	2.34e-07	5.56e-06	TP53I11	tumor protein p53 inducible protein 11 [Source:HGNC Symbol;Acc:HGNC:16842]
ENSG00000089327	36.7159	106.831	FXYD5	-1.5409	5.37e-09	1.62e-07	FXYD5	FXYD domain containing ion transport regulator 5 [Source:HGNC Symbol;Acc:HGNC:4029]
ENSG00000143153	164.009	476.302	ATP1B1	-1.5381	8.4e-35	1.57e-32	ATP1B1	ATPase Na+/K+ transporting subunit beta 1 [Source:HGNC Symbol;Acc:HGNC:804]
ENSG00000106605	32.1376	92.5243	BLVRA	-1.5256	7.06e-08	1.83e-06	BLVRA	biliverdin reductase A [Source:HGNC Symbol;Acc:HGNC:1062]
ENSG00000104312	21.8141	62.762	RIPK2	-1.5246	9.13e-06	0.00016262	RIPK2	receptor interacting serine/threonine kinase 2 [Source:HGNC Symbol;Acc:HGNC:10020]
ENSG00000104518	26.0332	74.7714	GSDMD	-1.5221	1.32e-06	2.76e-05	GSDMD	gasdermin D [Source:HGNC Symbol;Acc:HGNC:25697]
ENSG00000041353	36.5363	104.638	RAB27B	-1.518	1.13e-08	3.3e-07	RAB27B	RAB27B, member RAS oncogene family [Source:HGNC Symbol;Acc:HGNC:9767]
ENSG00000074527	58.9788	168.444	NTN4	-1.514	4.82e-13	2.27e-11	NTN4	netrin 4 [Source:HGNC Symbol;Acc:HGNC:13658]
ENSG00000152952	81.6008	232.877	PLOD2	-1.5129	1.95e-17	1.4e-15	PLOD2	procollagen-lysine,2-oxoglutarate 5-dioxygenase 2 [Source:HGNC Symbol;Acc:HGNC:9082]
ENSG00000074842	84.0245	239.665	MYDGF	-1.5121	6.9e-18	5.13e-16	MYDGF	myeloid derived growth factor [Source:HGNC Symbol;Acc:HGNC:16948]
ENSG00000164465	44.6156	126.777	DCBLD1	-1.5067	4.12e-10	1.44e-08	DCBLD1	discoidin, CUB and LCCL domain containing 1 [Source:HGNC Symbol;Acc:HGNC:21479]
ENSG00000127415	15.3506	43.547	IDUA	-1.5043	0.00025409	0.0032391	IDUA	iduronidase, alpha-L- [Source:HGNC Symbol;Acc:HGNC:5391]
ENSG00000214530	16.6972	47.3065	STARD10	-1.5024	0.00013943	0.0019025	STARD10	StAR related lipid transfer domain containing 10 [Source:HGNC Symbol;Acc:HGNC:10666]
ENSG00000111679	18.1335	51.2748	PTPN6	-1.4996	7.5e-05	0.0011034	PTPN6	protein tyrosine phosphatase, non-receptor type 6 [Source:HGNC Symbol;Acc:HGNC:9658]
ENSG00000138495	28.9059	81.0371	COX17	-1.4872	7.54e-07	1.65e-05	COX17	COX17, cytochrome c oxidase copper chaperone [Source:HGNC Symbol;Acc:HGNC:2264]
ENSG00000129422	137.438	384.926	MTUS1	-1.4858	4.54e-27	6.03e-25	MTUS1	microtubule associated scaffold protein 1 [Source:HGNC Symbol;Acc:HGNC:29789]
ENSG00000124313	39.6783	110.904	IQSEC2	-1.4829	7.73e-09	2.29e-07	IQSEC2	IQ motif and Sec7 domain 2 [Source:HGNC Symbol;Acc:HGNC:29059]
ENSG00000181031	22.1731	61.8221	RPH3AL	-1.4793	1.68e-05	0.00028542	RPH3AL	rabphilin 3A like (without C2 domains) [Source:HGNC Symbol;Acc:HGNC:10296]
ENSG00000138760	55.4777	154.555	SCARB2	-1.4781	1.05e-11	4.25e-10	SCARB2	scavenger receptor class B member 2 [Source:HGNC Symbol;Acc:HGNC:1665]
ENSG00000074181	30.5217	85.0054	NOTCH3	-1.4777	4.62e-07	1.05e-05	NOTCH3	notch 3 [Source:HGNC Symbol;Acc:HGNC:7883]
ENSG00000089199	21.0959	58.6893	CHGB	-1.4761	2.84e-05	0.00046274	CHGB	chromogranin B [Source:HGNC Symbol;Acc:HGNC:1930]
ENSG00000160867	35.0102	97.3281	FGFR4	-1.4751	7.15e-08	1.85e-06	FGFR4	fibroblast growth factor receptor 4 [Source:HGNC Symbol;Acc:HGNC:3691]
ENSG00000163516	17.146	47.5153	ANKZF1	-1.4705	0.00017323	0.0022942	ANKZF1	ankyrin repeat and zinc finger domain containing 1 [Source:HGNC Symbol;Acc:HGNC:25527]
ENSG00000182871	98.9263	274.022	COL18A1	-1.4699	1.96e-19	1.65e-17	COL18A1	collagen type XVIII alpha 1 chain [Source:HGNC Symbol;Acc:HGNC:2195]
ENSG00000051108	29.0854	80.2017	HERPUD1	-1.4633	1.17e-06	2.47e-05	HERPUD1	homocysteine inducible ER protein with ubiquitin like domain 1 [Source:HGNC Symbol;Acc:HGNC:13744]
ENSG00000167925	27.9184	76.9644	GHDC	-1.463	1.93e-06	3.91e-05	GHDC	GH3 domain containing [Source:HGNC Symbol;Acc:HGNC:24438]
ENSG00000002586	62.6593	172.726	CD99	-1.4629	9.95e-13	4.52e-11	CD99	CD99 molecule (Xg blood group) [Source:HGNC Symbol;Acc:HGNC:7082]
ENSG00000126351	32.4967	89.3915	THRA	-1.4598	3.03e-07	7.06e-06	THRA	thyroid hormone receptor, alpha [Source:HGNC Symbol;Acc:HGNC:11796]
ENSG00000261780	22.4425	61.5088	AC105243.1	-1.4546	2.27e-05	0.0003762	AC105243.1	-
ENSG00000108840	19.3005	52.7368	HDAC5	-1.4502	9.09e-05	0.0013089	HDAC5	histone deacetylase 5 [Source:HGNC Symbol;Acc:HGNC:14068]
ENSG00000115525	65.9808	179.618	ST3GAL5	-1.4448	5.91e-13	2.75e-11	ST3GAL5	ST3 beta-galactoside alpha-2,3-sialyltransferase 5 [Source:HGNC Symbol;Acc:HGNC:10872]
ENSG00000069399	67.6864	184.109	BCL3	-1.4436	3.16e-13	1.52e-11	BCL3	B-cell CLL/lymphoma 3 [Source:HGNC Symbol;Acc:HGNC:998]
ENSG00000130508	16.9665	46.0533	PXDN	-1.4406	0.00027406	0.0034551	PXDN	peroxidasin [Source:HGNC Symbol;Acc:HGNC:14966]
ENSG00000072310	196.327	532.172	SREBF1	-1.4386	4.43e-35	8.42e-33	SREBF1	sterol regulatory element binding transcription factor 1 [Source:HGNC Symbol;Acc:HGNC:11289]
ENSG00000168487	43.4486	117.692	BMP1	-1.4376	6.34e-09	1.89e-07	BMP1	bone morphogenetic protein 1 [Source:HGNC Symbol;Acc:HGNC:1067]
ENSG00000167107	21.0061	56.7051	ACSF2	-1.4327	5.81e-05	0.00087294	ACSF2	acyl-CoA synthetase family member 2 [Source:HGNC Symbol;Acc:HGNC:26101]
ENSG00000104870	29.624	79.8884	FCGRT	-1.4312	1.86e-06	3.78e-05	FCGRT	Fc fragment of IgG receptor and transporter [Source:HGNC Symbol;Acc:HGNC:3621]
ENSG00000188153	37.7033	101.61	COL4A5	-1.4303	7.67e-08	1.96e-06	COL4A5	collagen type IV alpha 5 chain [Source:HGNC Symbol;Acc:HGNC:2207]
ENSG00000102531	30.3422	81.7681	FNDC3A	-1.4302	1.43e-06	2.94e-05	FNDC3A	fibronectin type III domain containing 3A [Source:HGNC Symbol;Acc:HGNC:20296]
ENSG00000146038	19.3005	51.9014	DCDC2	-1.4271	0.00012575	0.0017489	DCDC2	doublecortin domain containing 2 [Source:HGNC Symbol;Acc:HGNC:18141]
ENSG00000118985	16.787	45.1134	ELL2	-1.4262	0.0003525	0.0042906	ELL2	elongation factor for RNA polymerase II 2 [Source:HGNC Symbol;Acc:HGNC:17064]
ENSG00000146477	34.9205	93.7775	SLC22A3	-1.4252	2.62e-07	6.14e-06	SLC22A3	solute carrier family 22 member 3 [Source:HGNC Symbol;Acc:HGNC:10967]
ENSG00000161638	26.3026	70.3853	ITGA5	-1.4201	8.65e-06	0.00015487	ITGA5	integrin subunit alpha 5 [Source:HGNC Symbol;Acc:HGNC:6141]
ENSG00000008394	233.85	625.218	MGST1	-1.4188	4.47e-40	1.05e-37	MGST1	microsomal glutathione S-transferase 1 [Source:HGNC Symbol;Acc:HGNC:7061]
ENSG00000099822	33.7534	90.1225	HCN2	-1.4169	5.04e-07	1.13e-05	HCN2	hyperpolarization activated cyclic nucleotide gated potassium and sodium channel 2 [Source:HGNC Symbol;Acc:HGNC:4846]
ENSG00000117335	135.822	362.474	CD46	-1.4162	7.2e-24	8.03e-22	CD46	CD46 molecule [Source:HGNC Symbol;Acc:HGNC:6953]
ENSG00000127920	46.1417	123.122	GNG11	-1.4159	4.35e-09	1.33e-07	GNG11	G protein subunit gamma 11 [Source:HGNC Symbol;Acc:HGNC:4403]
ENSG00000140297	93.0015	248.02	GCNT3	-1.4151	8.22e-17	5.66e-15	GCNT3	glucosaminyl (N-acetyl) transferase 3, mucin type [Source:HGNC Symbol;Acc:HGNC:4205]
ENSG00000147100	21.1857	56.2874	SLC16A2	-1.4097	7.64e-05	0.0011233	SLC16A2	solute carrier family 16 member 2 [Source:HGNC Symbol;Acc:HGNC:10923]
ENSG00000134243	23.4299	62.031	SORT1	-1.4046	3.47e-05	0.00055108	SORT1	sortilin 1 [Source:HGNC Symbol;Acc:HGNC:11186]
ENSG00000146376	17.5949	46.471	ARHGAP18	-1.4012	0.00034781	0.0042388	ARHGAP18	Rho GTPase activating protein 18 [Source:HGNC Symbol;Acc:HGNC:21035]
ENSG00000141480	73.5215	194.134	ARRB2	-1.4008	2.68e-13	1.29e-11	ARRB2	arrestin beta 2 [Source:HGNC Symbol;Acc:HGNC:712]
ENSG00000120306	42.5509	112.261	CYSTM1	-1.3996	2.78e-08	7.67e-07	CYSTM1	cysteine rich transmembrane module containing 1 [Source:HGNC Symbol;Acc:HGNC:30239]
ENSG00000102804	114.097	300.234	TSC22D1	-1.3958	1.25e-19	1.07e-17	TSC22D1	TSC22 domain family member 1 [Source:HGNC Symbol;Acc:HGNC:16826]
ENSG00000104763	107.634	282.794	ASAH1	-1.3936	1.54e-18	1.19e-16	ASAH1	N-acylsphingosine amidohydrolase 1 [Source:HGNC Symbol;Acc:HGNC:735]
ENSG00000090013	141.657	371.977	BLVRB	-1.3928	7.26e-24	8.05e-22	BLVRB	biliverdin reductase B [Source:HGNC Symbol;Acc:HGNC:1063]
ENSG00000166347	48.9245	128.448	CYB5A	-1.3926	3.26e-09	1.02e-07	CYB5A	cytochrome b5 type A [Source:HGNC Symbol;Acc:HGNC:2570]
ENSG00000134824	282.775	741.135	FADS2	-1.3901	9.38e-46	2.84e-43	FADS2	fatty acid desaturase 2 [Source:HGNC Symbol;Acc:HGNC:3575]
ENSG00000135404	225.232	590.339	CD63	-1.3901	8.5e-37	1.74e-34	CD63	CD63 molecule [Source:HGNC Symbol;Acc:HGNC:1692]
ENSG00000125734	33.3944	87.4073	GPR108	-1.3881	1.12e-06	2.38e-05	GPR108	G protein-coupled receptor 108 [Source:HGNC Symbol;Acc:HGNC:17829]
ENSG00000105835	290.136	757.739	NAMPT	-1.385	1.76e-46	5.61e-44	NAMPT	nicotinamide phosphoribosyltransferase [Source:HGNC Symbol;Acc:HGNC:30092]
ENSG00000105429	99.1059	258.462	MEGF8	-1.3829	6.86e-17	4.75e-15	MEGF8	multiple EGF like domains 8 [Source:HGNC Symbol;Acc:HGNC:3233]
ENSG00000139112	25.7639	66.8347	GABARAPL1	-1.3752	2.37e-05	0.00039111	GABARAPL1	GABA type A receptor associated protein like 1 [Source:HGNC Symbol;Acc:HGNC:4068]
ENSG00000139211	298.933	774.97	AMIGO2	-1.3743	6.06e-47	1.99e-44	AMIGO2	adhesion molecule with Ig like domain 2 [Source:HGNC Symbol;Acc:HGNC:24073]
ENSG00000051523	267.424	692.366	CYBA	-1.3724	4.89e-42	1.2e-39	CYBA	cytochrome b-245 alpha chain [Source:HGNC Symbol;Acc:HGNC:2577]
ENSG00000147408	69.4818	179.096	CSGALNACT1	-1.366	5.86e-12	2.44e-10	CSGALNACT1	chondroitin sulfate N-acetylgalactosaminyltransferase 1 [Source:HGNC Symbol;Acc:HGNC:24290]
ENSG00000102265	71.0079	182.856	TIMP1	-1.3647	3.67e-12	1.55e-10	TIMP1	TIMP metallopeptidase inhibitor 1 [Source:HGNC Symbol;Acc:HGNC:11820]
ENSG00000205213	93.2708	239.874	LGR4	-1.3628	1.85e-15	1.11e-13	LGR4	leucine rich repeat containing G protein-coupled receptor 4 [Source:HGNC Symbol;Acc:HGNC:13299]
ENSG00000214944	41.8327	107.249	ARHGEF28	-1.3583	1.14e-07	2.84e-06	ARHGEF28	Rho guanine nucleotide exchange factor 28 [Source:HGNC Symbol;Acc:HGNC:30322]
ENSG00000164713	59.6072	152.258	BRI3	-1.353	3.01e-10	1.06e-08	BRI3	brain protein I3 [Source:HGNC Symbol;Acc:HGNC:1109]
ENSG00000171345	46.3212	117.901	KRT19	-1.3478	3.29e-08	8.94e-07	KRT19	keratin 19 [Source:HGNC Symbol;Acc:HGNC:6436]
ENSG00000162889	42.5509	108.293	MAPKAPK2	-1.3477	1.19e-07	2.95e-06	MAPKAPK2	mitogen-activated protein kinase-activated protein kinase 2 [Source:HGNC Symbol;Acc:HGNC:6887]
ENSG00000166710	139.951	355.582	B2M	-1.3453	9.52e-22	9.47e-20	B2M	beta-2-microglobulin [Source:HGNC Symbol;Acc:HGNC:914]
ENSG00000104856	33.0353	83.8567	RELB	-1.3439	3.33e-06	6.45e-05	RELB	RELB proto-oncogene, NF-kB subunit [Source:HGNC Symbol;Acc:HGNC:9956]
ENSG00000184164	25.2253	63.7019	CRELD2	-1.3365	5.48e-05	0.00082991	CRELD2	cysteine rich with EGF like domains 2 [Source:HGNC Symbol;Acc:HGNC:28150]
ENSG00000135047	446.156	1126.37	CTSL	-1.3361	1.48e-64	8.22e-62	CTSL	cathepsin L [Source:HGNC Symbol;Acc:HGNC:2537]
ENSG00000151136	27.3798	68.8189	BTBD11	-1.3297	2.96e-05	0.00048092	BTBD11	BTB domain containing 11 [Source:HGNC Symbol;Acc:HGNC:23844]
ENSG00000149485	314.643	789.068	FADS1	-1.3264	3.01e-45	8.84e-43	FADS1	fatty acid desaturase 1 [Source:HGNC Symbol;Acc:HGNC:3574]
ENSG00000145685	46.6803	116.856	LHFPL2	-1.3239	5.87e-08	1.54e-06	LHFPL2	LHFPL tetraspan subfamily member 2 [Source:HGNC Symbol;Acc:HGNC:6588]
ENSG00000102158	44.5258	111.322	MAGT1	-1.322	1.24e-07	3.07e-06	MAGT1	magnesium transporter 1 [Source:HGNC Symbol;Acc:HGNC:28880]
ENSG00000128311	39.768	99.3122	TST	-1.3204	6.08e-07	1.35e-05	TST	thiosulfate sulfurtransferase [Source:HGNC Symbol;Acc:HGNC:12388]
ENSG00000139168	31.2399	78.0087	ZCRB1	-1.3202	9.82e-06	0.00017424	ZCRB1	zinc finger CCHC-type and RNA binding motif containing 1 [Source:HGNC Symbol;Acc:HGNC:29620]
ENSG00000168461	26.0332	64.955	RAB31	-1.3191	5.55e-05	0.00083806	RAB31	RAB31, member RAS oncogene family [Source:HGNC Symbol;Acc:HGNC:9771]
ENSG00000042493	28.3673	70.6986	CAPG	-1.3175	2.65e-05	0.00043423	CAPG	capping actin protein, gelsolin like [Source:HGNC Symbol;Acc:HGNC:1474]
ENSG00000155115	26.123	64.955	GTF3C6	-1.3141	5.84e-05	0.00087633	GTF3C6	general transcription factor IIIC subunit 6 [Source:HGNC Symbol;Acc:HGNC:20872]
ENSG00000138772	32.1376	79.8884	ANXA3	-1.3137	8.34e-06	0.00014969	ANXA3	annexin A3 [Source:HGNC Symbol;Acc:HGNC:541]
ENSG00000169692	40.2169	99.9388	AGPAT2	-1.3132	6.27e-07	1.39e-05	AGPAT2	1-acylglycerol-3-phosphate O-acyltransferase 2 [Source:HGNC Symbol;Acc:HGNC:325]
ENSG00000170266	51.7972	128.657	GLB1	-1.3126	1.59e-08	4.54e-07	GLB1	galactosidase beta 1 [Source:HGNC Symbol;Acc:HGNC:4298]
ENSG00000143850	30.432	75.3979	PLEKHA6	-1.3089	1.58e-05	0.00026949	PLEKHA6	pleckstrin homology domain containing A6 [Source:HGNC Symbol;Acc:HGNC:17053]
ENSG00000185033	80.4337	199.251	SEMA4B	-1.3087	2.28e-12	9.87e-11	SEMA4B	semaphorin 4B [Source:HGNC Symbol;Acc:HGNC:10730]
ENSG00000144802	31.4194	77.7998	NFKBIZ	-1.3081	1.17e-05	0.0002054	NFKBIZ	NFKB inhibitor zeta [Source:HGNC Symbol;Acc:HGNC:29805]
ENSG00000101210	100.273	247.706	EEF1A2	-1.3047	6e-15	3.42e-13	EEF1A2	eukaryotic translation elongation factor 1 alpha 2 [Source:HGNC Symbol;Acc:HGNC:3192]
ENSG00000166925	32.2274	79.3663	TSC22D4	-1.3002	1.06e-05	0.00018687	TSC22D4	TSC22 domain family member 4 [Source:HGNC Symbol;Acc:HGNC:21696]
ENSG00000110811	23.789	58.1671	P3H3	-1.2899	0.00017897	0.0023584	P3H3	prolyl 3-hydroxylase 3 [Source:HGNC Symbol;Acc:HGNC:19318]
ENSG00000141526	93.2708	227.134	SLC16A3	-1.284	1.61e-13	7.98e-12	SLC16A3	solute carrier family 16 member 3 [Source:HGNC Symbol;Acc:HGNC:10924]
ENSG00000088826	245.431	596.291	SMOX	-1.2807	8.26e-33	1.37e-30	SMOX	spermine oxidase [Source:HGNC Symbol;Acc:HGNC:15862]
ENSG00000164638	28.8161	69.8632	SLC29A4	-1.2777	4.6e-05	0.00070694	SLC29A4	solute carrier family 29 member 4 [Source:HGNC Symbol;Acc:HGNC:23097]
ENSG00000105852	34.9205	84.5877	PON3	-1.2764	7.45e-06	0.00013518	PON3	paraoxonase 3 [Source:HGNC Symbol;Acc:HGNC:9206]
ENSG00000197261	30.2524	73.2049	C6orf141	-1.2749	3.13e-05	0.00050436	C6orf141	chromosome 6 open reading frame 141 [Source:HGNC Symbol;Acc:HGNC:21351]
ENSG00000170004	104.043	251.361	CHD3	-1.2726	1.31e-14	7.25e-13	CHD3	chromodomain helicase DNA binding protein 3 [Source:HGNC Symbol;Acc:HGNC:1918]
ENSG00000128283	21.9936	53.0501	CDC42EP1	-1.2703	0.00040884	0.0049025	CDC42EP1	CDC42 effector protein 1 [Source:HGNC Symbol;Acc:HGNC:17014]
ENSG00000006118	180.437	435.052	TMEM132A	-1.2697	4.56e-24	5.18e-22	TMEM132A	transmembrane protein 132A [Source:HGNC Symbol;Acc:HGNC:31092]
ENSG00000030582	184.836	445.6	GRN	-1.2695	1.32e-24	1.53e-22	GRN	granulin precursor [Source:HGNC Symbol;Acc:HGNC:4601]
ENSG00000162545	37.7931	90.9579	CAMK2N1	-1.2671	3.87e-06	7.4e-05	CAMK2N1	calcium/calmodulin dependent protein kinase II inhibitor 1 [Source:HGNC Symbol;Acc:HGNC:24190]
ENSG00000141504	53.5028	128.344	SAT2	-1.2623	4.51e-08	1.2e-06	SAT2	spermidine/spermine N1-acetyltransferase family member 2 [Source:HGNC Symbol;Acc:HGNC:23160]
ENSG00000115919	298.036	714.401	KYNU	-1.2612	4.63e-38	9.98e-36	KYNU	kynureninase [Source:HGNC Symbol;Acc:HGNC:6469]
ENSG00000118217	24.5969	58.8981	ATF6	-1.2597	0.00021645	0.0027997	ATF6	activating transcription factor 6 [Source:HGNC Symbol;Acc:HGNC:791]
ENSG00000167468	106.018	253.763	GPX4	-1.2592	1.65e-14	9.05e-13	GPX4	glutathione peroxidase 4 [Source:HGNC Symbol;Acc:HGNC:4556]
ENSG00000162496	71.7261	171.577	DHRS3	-1.2583	2.83e-10	9.97e-09	DHRS3	dehydrogenase/reductase 3 [Source:HGNC Symbol;Acc:HGNC:17693]
ENSG00000102580	23.9685	57.2272	DNAJC3	-1.2556	0.00027656	0.0034803	DNAJC3	DnaJ heat shock protein family (Hsp40) member C3 [Source:HGNC Symbol;Acc:HGNC:9439]
ENSG00000146674	177.834	423.67	IGFBP3	-1.2524	5.34e-23	5.69e-21	IGFBP3	insulin like growth factor binding protein 3 [Source:HGNC Symbol;Acc:HGNC:5472]
ENSG00000023171	81.1519	193.09	GRAMD1B	-1.2506	2.77e-11	1.1e-09	GRAMD1B	GRAM domain containing 1B [Source:HGNC Symbol;Acc:HGNC:29214]
ENSG00000113504	40.3964	96.0749	SLC12A7	-1.2499	2.67e-06	5.25e-05	SLC12A7	solute carrier family 12 member 7 [Source:HGNC Symbol;Acc:HGNC:10915]
ENSG00000185477	26.6616	63.2841	GPRIN3	-1.2471	0.00014301	0.0019404	GPRIN3	GPRIN family member 3 [Source:HGNC Symbol;Acc:HGNC:27733]
ENSG00000173209	66.3399	157.375	AHSA2	-1.2463	2.05e-09	6.49e-08	AHSA2	activator of HSP90 ATPase homolog 2 [Source:HGNC Symbol;Acc:HGNC:20437]
ENSG00000171159	37.7931	89.6003	C9orf16	-1.2454	6.18e-06	0.0001143	C9orf16	chromosome 9 open reading frame 16 [Source:HGNC Symbol;Acc:HGNC:17823]
ENSG00000125826	95.9639	226.507	RBCK1	-1.239	8.25e-13	3.8e-11	RBCK1	RANBP2-type and C3HC4-type zinc finger containing 1 [Source:HGNC Symbol;Acc:HGNC:15864]
ENSG00000069869	55.747	130.85	NEDD4	-1.2309	6.28e-08	1.64e-06	NEDD4	neural precursor cell expressed, developmentally down-regulated 4, E3 ubiquitin protein ligase [Source:HGNC Symbol;Acc:HGNC:7727]
ENSG00000174938	35.9079	84.17	SEZ6L2	-1.229	1.47e-05	0.00025178	SEZ6L2	seizure related 6 homolog like 2 [Source:HGNC Symbol;Acc:HGNC:30844]
ENSG00000012822	28.9059	67.6702	CALCOCO1	-1.2272	0.00010397	0.0014735	CALCOCO1	calcium binding and coiled-coil domain 1 [Source:HGNC Symbol;Acc:HGNC:29306]
ENSG00000123358	67.058	156.853	NR4A1	-1.2259	3.54e-09	1.1e-07	NR4A1	nuclear receptor subfamily 4 group A member 1 [Source:HGNC Symbol;Acc:HGNC:7980]
ENSG00000152291	140.669	328.848	TGOLN2	-1.2251	1.29e-17	9.36e-16	TGOLN2	trans-golgi network protein 2 [Source:HGNC Symbol;Acc:HGNC:15450]
ENSG00000171604	27.3798	63.9107	CXXC5	-1.2229	0.00016911	0.0022457	CXXC5	CXXC finger protein 5 [Source:HGNC Symbol;Acc:HGNC:26943]
ENSG00000026508	288.969	673.36	CD44	-1.2205	3.49e-34	6.04e-32	CD44	CD44 molecule (Indian blood group) [Source:HGNC Symbol;Acc:HGNC:1681]
ENSG00000138166	61.1332	142.337	DUSP5	-1.2193	2.15e-08	6.04e-07	DUSP5	dual specificity phosphatase 5 [Source:HGNC Symbol;Acc:HGNC:3071]
ENSG00000139625	34.3818	79.8884	MAP3K12	-1.2163	2.83e-05	0.00046142	MAP3K12	mitogen-activated protein kinase kinase kinase 12 [Source:HGNC Symbol;Acc:HGNC:6851]
ENSG00000196535	80.8826	187.868	MYO18A	-1.2158	1.38e-10	5.06e-09	MYO18A	myosin XVIIIA [Source:HGNC Symbol;Acc:HGNC:31104]
ENSG00000141232	97.9389	227.447	TOB1	-1.2156	1.66e-12	7.35e-11	TOB1	transducer of ERBB2, 1 [Source:HGNC Symbol;Acc:HGNC:11979]
ENSG00000149428	56.1959	130.328	HYOU1	-1.2136	9.42e-08	2.37e-06	HYOU1	hypoxia up-regulated 1 [Source:HGNC Symbol;Acc:HGNC:16931]
ENSG00000123240	54.9391	127.299	OPTN	-1.2123	1.36e-07	3.32e-06	OPTN	optineurin [Source:HGNC Symbol;Acc:HGNC:17142]
ENSG00000198053	31.5092	72.9961	SIRPA	-1.212	6.6e-05	0.00097901	SIRPA	signal regulatory protein alpha [Source:HGNC Symbol;Acc:HGNC:9662]
ENSG00000064601	59.9662	138.891	CTSA	-1.2117	3.73e-08	1.01e-06	CTSA	cathepsin A [Source:HGNC Symbol;Acc:HGNC:9251]
ENSG00000169926	85.2813	197.162	KLF13	-1.2091	5.95e-11	2.27e-09	KLF13	Kruppel like factor 13 [Source:HGNC Symbol;Acc:HGNC:13672]
ENSG00000077238	26.2128	60.569	IL4R	-1.2083	0.00028835	0.0035909	IL4R	interleukin 4 receptor [Source:HGNC Symbol;Acc:HGNC:6015]
ENSG00000105290	68.0455	156.748	APLP1	-1.2039	6.06e-09	1.82e-07	APLP1	amyloid beta precursor like protein 1 [Source:HGNC Symbol;Acc:HGNC:597]
ENSG00000123989	40.935	94.1952	CHPF	-1.2023	6.7e-06	0.00012316	CHPF	chondroitin polymerizing factor [Source:HGNC Symbol;Acc:HGNC:24291]
ENSG00000198517	118.945	273.396	MAFK	-1.2007	1.81e-14	9.93e-13	MAFK	MAF bZIP transcription factor K [Source:HGNC Symbol;Acc:HGNC:6782]
ENSG00000096433	57.9913	133.043	ITPR3	-1.198	9.52e-08	2.39e-06	ITPR3	inositol 1,4,5-trisphosphate receptor type 3 [Source:HGNC Symbol;Acc:HGNC:6182]
ENSG00000125170	66.699	152.989	DOK4	-1.1977	1.06e-08	3.12e-07	DOK4	docking protein 4 [Source:HGNC Symbol;Acc:HGNC:19868]
ENSG00000113369	31.9581	73.2049	ARRDC3	-1.1958	7.76e-05	0.0011378	ARRDC3	arrestin domain containing 3 [Source:HGNC Symbol;Acc:HGNC:29263]
ENSG00000185262	32.9455	75.3979	UBALD2	-1.1944	6.15e-05	0.00092118	UBALD2	UBA like domain containing 2 [Source:HGNC Symbol;Acc:HGNC:28438]
ENSG00000068912	62.4798	142.859	ERLEC1	-1.1931	3.58e-08	9.68e-07	ERLEC1	endoplasmic reticulum lectin 1 [Source:HGNC Symbol;Acc:HGNC:25222]
ENSG00000204386	29.4445	67.2525	NEU1	-1.1916	0.00015888	0.0021274	NEU1	neuraminidase 1 [Source:HGNC Symbol;Acc:HGNC:7758]
ENSG00000163346	34.8307	79.3663	PBXIP1	-1.1882	4.26e-05	0.00065745	PBXIP1	PBX homeobox interacting protein 1 [Source:HGNC Symbol;Acc:HGNC:21199]
ENSG00000168056	107.634	244.991	LTBP3	-1.1866	6.77e-13	3.14e-11	LTBP3	latent transforming growth factor beta binding protein 3 [Source:HGNC Symbol;Acc:HGNC:6716]
ENSG00000171298	113.02	256.792	GAA	-1.184	2.11e-13	1.03e-11	GAA	glucosidase alpha, acid [Source:HGNC Symbol;Acc:HGNC:4065]
ENSG00000198121	34.1125	77.4865	LPAR1	-1.1836	5.54e-05	0.00083764	LPAR1	lysophosphatidic acid receptor 1 [Source:HGNC Symbol;Acc:HGNC:3166]
ENSG00000172725	55.4777	125.942	CORO1B	-1.1828	2.79e-07	6.54e-06	CORO1B	coronin 1B [Source:HGNC Symbol;Acc:HGNC:2253]
ENSG00000159658	30.791	69.7588	EFCAB14	-1.1799	0.00013607	0.0018684	EFCAB14	EF-hand calcium binding domain 14 [Source:HGNC Symbol;Acc:HGNC:29051]
ENSG00000135052	118.855	269.01	GOLM1	-1.1785	7.15e-14	3.7e-12	GOLM1	golgi membrane protein 1 [Source:HGNC Symbol;Acc:HGNC:15451]
ENSG00000111269	29.3547	66.417	CREBL2	-1.178	0.00020103	0.0026212	CREBL2	cAMP responsive element binding protein like 2 [Source:HGNC Symbol;Acc:HGNC:2350]
ENSG00000141756	169.575	382.524	FKBP10	-1.1736	5.8e-19	4.61e-17	FKBP10	FK506 binding protein 10 [Source:HGNC Symbol;Acc:HGNC:18169]
ENSG00000139178	32.3171	72.8916	C1RL	-1.1735	0.00010344	0.0014671	C1RL	complement C1r subcomponent like [Source:HGNC Symbol;Acc:HGNC:21265]
ENSG00000115648	203.777	459.489	MLPH	-1.173	1.92e-22	2.01e-20	MLPH	melanophilin [Source:HGNC Symbol;Acc:HGNC:29643]
ENSG00000013364	120.561	271.725	MVP	-1.1724	6.85e-14	3.55e-12	MVP	major vault protein [Source:HGNC Symbol;Acc:HGNC:7531]
ENSG00000086289	55.6573	125.42	EPDR1	-1.1721	3.62e-07	8.36e-06	EPDR1	ependymin related 1 [Source:HGNC Symbol;Acc:HGNC:17572]
ENSG00000167702	32.3171	72.6828	KIFC2	-1.1693	0.00011088	0.0015611	KIFC2	kinesin family member C2 [Source:HGNC Symbol;Acc:HGNC:29530]
ENSG00000068137	30.8808	69.4455	PLEKHH3	-1.1692	0.00015809	0.0021205	PLEKHH3	pleckstrin homology, MyTH4 and FERM domain containing H3 [Source:HGNC Symbol;Acc:HGNC:26105]
ENSG00000172340	40.1271	90.018	SUCLG2	-1.1656	1.78e-05	0.00030063	SUCLG2	succinate-CoA ligase GDP-forming beta subunit [Source:HGNC Symbol;Acc:HGNC:11450]
ENSG00000049860	90.0391	201.653	HEXB	-1.1633	1.44e-10	5.28e-09	HEXB	hexosaminidase subunit beta [Source:HGNC Symbol;Acc:HGNC:4879]
ENSG00000142166	29.265	65.3727	IFNAR1	-1.1595	0.00027223	0.0034364	IFNAR1	interferon alpha and beta receptor subunit 1 [Source:HGNC Symbol;Acc:HGNC:5432]
ENSG00000112977	45.3338	101.192	DAP	-1.1584	6.02e-06	0.00011173	DAP	death associated protein [Source:HGNC Symbol;Acc:HGNC:2672]
ENSG00000150527	36.7159	81.8726	CTAGE5	-1.157	4.77e-05	0.00073165	CTAGE5	CTAGE family member 5, ER export factor [Source:HGNC Symbol;Acc:HGNC:7057]
ENSG00000163527	136.091	303.263	STT3B	-1.156	5.22e-15	3e-13	STT3B	STT3B, catalytic subunit of the oligosaccharyltransferase complex [Source:HGNC Symbol;Acc:HGNC:30611]
ENSG00000166340	51.079	113.723	TPP1	-1.1547	1.71e-06	3.5e-05	TPP1	tripeptidyl peptidase 1 [Source:HGNC Symbol;Acc:HGNC:2073]
ENSG00000166598	507.648	1129.19	HSP90B1	-1.1534	2.6e-51	9.71e-49	HSP90B1	heat shock protein 90 beta family member 1 [Source:HGNC Symbol;Acc:HGNC:12028]
ENSG00000105854	303.691	671.898	PON2	-1.1456	6.83e-31	1.06e-28	PON2	paraoxonase 2 [Source:HGNC Symbol;Acc:HGNC:9205]
ENSG00000177674	38.5112	85.0054	AGTRAP	-1.1423	4.14e-05	0.00064	AGTRAP	angiotensin II receptor associated protein [Source:HGNC Symbol;Acc:HGNC:13539]
ENSG00000099282	64.724	142.859	TSPAN15	-1.1422	1.07e-07	2.67e-06	TSPAN15	tetraspanin 15 [Source:HGNC Symbol;Acc:HGNC:23298]
ENSG00000107438	84.6529	186.824	PDLIM1	-1.142	1.22e-09	4e-08	PDLIM1	PDZ and LIM domain 1 [Source:HGNC Symbol;Acc:HGNC:2067]
ENSG00000164050	35.0102	77.0688	PLXNB1	-1.1384	9.92e-05	0.0014135	PLXNB1	plexin B1 [Source:HGNC Symbol;Acc:HGNC:9103]
ENSG00000128309	69.3921	152.571	MPST	-1.1366	4.5e-08	1.2e-06	MPST	mercaptopyruvate sulfurtransferase [Source:HGNC Symbol;Acc:HGNC:7223]
ENSG00000151327	34.4716	75.7112	FAM177A1	-1.1351	0.00011871	0.0016606	FAM177A1	family with sequence similarity 177 member A1 [Source:HGNC Symbol;Acc:HGNC:19829]
ENSG00000121064	34.0228	74.5625	SCPEP1	-1.132	0.00013863	0.0018972	SCPEP1	serine carboxypeptidase 1 [Source:HGNC Symbol;Acc:HGNC:29507]
ENSG00000101160	128.999	282.272	CTSZ	-1.1297	1.34e-13	6.68e-12	CTSZ	cathepsin Z [Source:HGNC Symbol;Acc:HGNC:2547]
ENSG00000104805	115.534	252.719	NUCB1	-1.1292	2.53e-12	1.09e-10	NUCB1	nucleobindin 1 [Source:HGNC Symbol;Acc:HGNC:8043]
ENSG00000198911	88.1539	192.045	SREBF2	-1.1234	1.23e-09	4e-08	SREBF2	sterol regulatory element binding transcription factor 2 [Source:HGNC Symbol;Acc:HGNC:11290]
ENSG00000135002	62.3002	135.654	RFK	-1.1226	3.32e-07	7.7e-06	RFK	riboflavin kinase [Source:HGNC Symbol;Acc:HGNC:30324]
ENSG00000167615	203.957	442.467	LENG8	-1.1173	4.19e-20	3.77e-18	LENG8	leukocyte receptor cluster member 8 [Source:HGNC Symbol;Acc:HGNC:15500]
ENSG00000068903	32.4069	70.1765	SIRT2	-1.1147	0.0002628	0.003337	SIRT2	sirtuin 2 [Source:HGNC Symbol;Acc:HGNC:10886]
ENSG00000197122	305.038	658.531	SRC	-1.1103	7.63e-29	1.1e-26	SRC	SRC proto-oncogene, non-receptor tyrosine kinase [Source:HGNC Symbol;Acc:HGNC:11283]
ENSG00000108582	117.15	252.301	CPD	-1.1068	6.03e-12	2.51e-10	CPD	carboxypeptidase D [Source:HGNC Symbol;Acc:HGNC:2301]
ENSG00000117298	97.2207	209.381	ECE1	-1.1068	3.69e-10	1.29e-08	ECE1	endothelin converting enzyme 1 [Source:HGNC Symbol;Acc:HGNC:3146]
ENSG00000099219	58.0811	125.002	ERMP1	-1.1058	1.31e-06	2.74e-05	ERMP1	endoplasmic reticulum metallopeptidase 1 [Source:HGNC Symbol;Acc:HGNC:23703]
ENSG00000170412	45.6031	97.9547	GPRC5C	-1.103	1.92e-05	0.00032261	GPRC5C	G protein-coupled receptor class C group 5 member C [Source:HGNC Symbol;Acc:HGNC:13309]
ENSG00000130702	380.085	814.34	LAMA5	-1.0993	1.02e-34	1.85e-32	LAMA5	laminin subunit alpha 5 [Source:HGNC Symbol;Acc:HGNC:6485]
ENSG00000164823	67.058	143.59	OSGIN2	-1.0985	2.52e-07	5.93e-06	OSGIN2	oxidative stress induced growth inhibitor family member 2 [Source:HGNC Symbol;Acc:HGNC:1355]
ENSG00000141753	2387.07	5102.41	IGFBP4	-1.0959	2.27e-207	7.33e-204	IGFBP4	insulin like growth factor binding protein 4 [Source:HGNC Symbol;Acc:HGNC:5473]
ENSG00000143537	48.4757	103.594	ADAM15	-1.0956	1.24e-05	0.00021636	ADAM15	ADAM metallopeptidase domain 15 [Source:HGNC Symbol;Acc:HGNC:193]
ENSG00000146242	68.9432	146.619	TPBG	-1.0886	2.33e-07	5.54e-06	TPBG	trophoblast glycoprotein [Source:HGNC Symbol;Acc:HGNC:12004]
ENSG00000163479	107.095	226.403	SSR2	-1.08	1.74e-10	6.29e-09	SSR2	signal sequence receptor subunit 2 [Source:HGNC Symbol;Acc:HGNC:11324]
ENSG00000104142	33.0353	69.7588	VPS18	-1.0784	0.00040286	0.0048339	VPS18	VPS18, CORVET/HOPS core subunit [Source:HGNC Symbol;Acc:HGNC:15972]
ENSG00000198853	57.9913	122.182	RUSC2	-1.0751	3e-06	5.85e-05	RUSC2	RUN and SH3 domain containing 2 [Source:HGNC Symbol;Acc:HGNC:23625]
ENSG00000085662	1601.76	3370.87	AKR1B1	-1.0735	7.36e-133	9.52e-130	AKR1B1	aldo-keto reductase family 1 member B [Source:HGNC Symbol;Acc:HGNC:381]
ENSG00000096696	45.244	95.0306	DSP	-1.0707	4.05e-05	0.00062915	DSP	desmoplakin [Source:HGNC Symbol;Acc:HGNC:3052]
ENSG00000184922	40.935	85.9453	FMNL1	-1.0701	9.55e-05	0.0013678	FMNL1	formin like 1 [Source:HGNC Symbol;Acc:HGNC:1212]
ENSG00000107968	39.6783	83.0213	MAP3K8	-1.0651	0.00013364	0.0018389	MAP3K8	mitogen-activated protein kinase kinase kinase 8 [Source:HGNC Symbol;Acc:HGNC:6860]
ENSG00000116171	39.4987	82.6036	SCP2	-1.0644	0.00014021	0.001909	SCP2	sterol carrier protein 2 [Source:HGNC Symbol;Acc:HGNC:10606]
ENSG00000057252	38.1522	79.784	SOAT1	-1.0643	0.00018253	0.0023977	SOAT1	sterol O-acyltransferase 1 [Source:HGNC Symbol;Acc:HGNC:11177]
ENSG00000117859	54.4903	113.932	OSBPL9	-1.0641	7.79e-06	0.00014071	OSBPL9	oxysterol binding protein like 9 [Source:HGNC Symbol;Acc:HGNC:16386]
ENSG00000100097	204.226	426.28	LGALS1	-1.0616	6.03e-18	4.52e-16	LGALS1	galectin 1 [Source:HGNC Symbol;Acc:HGNC:6561]
ENSG00000146374	64.9036	134.818	RSPO3	-1.0546	1.39e-06	2.87e-05	RSPO3	R-spondin 3 [Source:HGNC Symbol;Acc:HGNC:20866]
ENSG00000167797	43.3588	90.018	CDK2AP2	-1.0539	8.1e-05	0.0011819	CDK2AP2	cyclin dependent kinase 2 associated protein 2 [Source:HGNC Symbol;Acc:HGNC:30833]
ENSG00000206503	50.8097	105.369	HLA-A	-1.0523	2.05e-05	0.00034365	HLA-A	major histocompatibility complex, class I, A [Source:HGNC Symbol;Acc:HGNC:4931]
ENSG00000116209	63.9161	132.103	TMEM59	-1.0474	2.04e-06	4.1e-05	TMEM59	transmembrane protein 59 [Source:HGNC Symbol;Acc:HGNC:1239]
ENSG00000172037	68.7637	141.606	LAMB2	-1.0422	9.75e-07	2.09e-05	LAMB2	laminin subunit beta 2 [Source:HGNC Symbol;Acc:HGNC:6487]
ENSG00000127947	89.68	184.318	PTPN12	-1.0393	2.49e-08	6.93e-07	PTPN12	protein tyrosine phosphatase, non-receptor type 12 [Source:HGNC Symbol;Acc:HGNC:9645]
ENSG00000053747	44.1667	90.6446	LAMA3	-1.0373	9.55e-05	0.0013678	LAMA3	laminin subunit alpha 3 [Source:HGNC Symbol;Acc:HGNC:6483]
ENSG00000136156	110.417	226.507	ITM2B	-1.0366	7.06e-10	2.39e-08	ITM2B	integral membrane protein 2B [Source:HGNC Symbol;Acc:HGNC:6174]
ENSG00000176871	36.9852	75.8157	WSB2	-1.0355	0.00036613	0.0044343	WSB2	WD repeat and SOCS box containing 2 [Source:HGNC Symbol;Acc:HGNC:19222]
ENSG00000046604	54.221	111.113	DSG2	-1.0351	1.62e-05	0.00027427	DSG2	desmoglein 2 [Source:HGNC Symbol;Acc:HGNC:3049]
ENSG00000155090	66.699	136.593	KLF10	-1.0342	1.77e-06	3.61e-05	KLF10	Kruppel like factor 10 [Source:HGNC Symbol;Acc:HGNC:11810]
ENSG00000174080	45.5133	92.5243	CTSF	-1.0235	9.73e-05	0.0013887	CTSF	cathepsin F [Source:HGNC Symbol;Acc:HGNC:2531]
ENSG00000133639	57.4527	116.543	BTG1	-1.0204	1.29e-05	0.0002235	BTG1	BTG anti-proliferation factor 1 [Source:HGNC Symbol;Acc:HGNC:1130]
ENSG00000111674	44.2565	89.287	ENO2	-1.0126	0.00014876	0.0020086	ENO2	enolase 2 [Source:HGNC Symbol;Acc:HGNC:3353]
ENSG00000167004	192.377	387.955	PDIA3	-1.012	2.71e-15	1.6e-13	PDIA3	protein disulfide isomerase family A member 3 [Source:HGNC Symbol;Acc:HGNC:4606]
ENSG00000277443	89.1414	179.723	MARCKS	-1.0116	7.56e-08	1.94e-06	MARCKS	myristoylated alanine rich protein kinase C substrate [Source:HGNC Symbol;Acc:HGNC:6759]
ENSG00000130202	118.855	238.934	NECTIN2	-1.0074	6.49e-10	2.2e-08	NECTIN2	nectin cell adhesion molecule 2 [Source:HGNC Symbol;Acc:HGNC:9707]
ENSG00000139182	54.4005	109.337	CLSTN3	-1.0071	2.94e-05	0.00047758	CLSTN3	calsyntenin 3 [Source:HGNC Symbol;Acc:HGNC:18371]
ENSG00000128228	39.5885	79.4707	SDF2L1	-1.0053	0.00037582	0.0045339	SDF2L1	stromal cell derived factor 2 like 1 [Source:HGNC Symbol;Acc:HGNC:10676]
ENSG00000175832	51.1688	102.654	ETV4	-1.0045	5.37e-05	0.00081473	ETV4	ETS variant 4 [Source:HGNC Symbol;Acc:HGNC:3493]
ENSG00000166165	123.972	61.9266	CKB	1.0014	1.91e-06	3.88e-05	CKB	creatine kinase B [Source:HGNC Symbol;Acc:HGNC:1991]
ENSG00000126453	88.3335	44.0692	BCL2L12	1.0032	5.68e-05	0.00085633	BCL2L12	BCL2 like 12 [Source:HGNC Symbol;Acc:HGNC:13787]
ENSG00000104332	105.659	52.6324	SFRP1	1.0054	1.03e-05	0.00018272	SFRP1	secreted frizzled related protein 1 [Source:HGNC Symbol;Acc:HGNC:10776]
ENSG00000182809	86.7176	43.1293	CRIP2	1.0077	6.27e-05	0.00093658	CRIP2	cysteine rich protein 2 [Source:HGNC Symbol;Acc:HGNC:2361]
ENSG00000065150	251.804	125.106	IPO5	1.0091	8.56e-12	3.52e-10	IPO5	importin 5 [Source:HGNC Symbol;Acc:HGNC:6402]
ENSG00000130726	1061.08	527.159	TRIM28	1.0092	1.13e-44	3.17e-42	TRIM28	tripartite motif containing 28 [Source:HGNC Symbol;Acc:HGNC:16384]
ENSG00000115758	289.867	143.695	ODC1	1.0124	2.05e-13	1.01e-11	ODC1	ornithine decarboxylase 1 [Source:HGNC Symbol;Acc:HGNC:8109]
ENSG00000149948	91.4754	45.3223	HMGA2	1.0132	3.65e-05	0.00057606	HMGA2	high mobility group AT-hook 2 [Source:HGNC Symbol;Acc:HGNC:5009]
ENSG00000105486	107.454	53.1545	LIG1	1.0155	7.37e-06	0.00013385	LIG1	DNA ligase 1 [Source:HGNC Symbol;Acc:HGNC:6598]
ENSG00000023516	68.4046	33.8351	AKAP11	1.0156	0.00034766	0.0042388	AKAP11	A-kinase anchoring protein 11 [Source:HGNC Symbol;Acc:HGNC:369]
ENSG00000161981	90.0391	44.4869	SNRNP25	1.0172	3.98e-05	0.00062005	SNRNP25	small nuclear ribonucleoprotein U11/U12 subunit 25 [Source:HGNC Symbol;Acc:HGNC:14161]
ENSG00000065526	94.7071	46.7843	SPEN	1.0174	2.5e-05	0.00041075	SPEN	spen family transcriptional repressor [Source:HGNC Symbol;Acc:HGNC:17575]
ENSG00000083168	69.3921	34.2528	KAT6A	1.0185	0.00030505	0.0037746	KAT6A	lysine acetyltransferase 6A [Source:HGNC Symbol;Acc:HGNC:13013]
ENSG00000116560	577.758	284.883	SFPQ	1.0201	1.74e-25	2.15e-23	SFPQ	splicing factor proline and glutamine rich [Source:HGNC Symbol;Acc:HGNC:10774]
ENSG00000162377	68.9432	33.9395	COA7	1.0224	0.00030605	0.0037846	COA7	cytochrome c oxidase assembly factor 7 (putative) [Source:HGNC Symbol;Acc:HGNC:25716]
ENSG00000138074	129.358	63.493	SLC5A6	1.0267	7e-07	1.53e-05	SLC5A6	solute carrier family 5 member 6 [Source:HGNC Symbol;Acc:HGNC:11041]
ENSG00000135069	363.747	178.47	PSAT1	1.0273	8.51e-17	5.83e-15	PSAT1	phosphoserine aminotransferase 1 [Source:HGNC Symbol;Acc:HGNC:19129]
ENSG00000112941	65.6217	32.1642	PAPD7	1.0287	0.00040149	0.0048204	PAPD7	poly(A) RNA polymerase D7, non-canonical [Source:HGNC Symbol;Acc:HGNC:16705]
ENSG00000082898	481.974	236.219	XPO1	1.0288	8.51e-22	8.51e-20	XPO1	exportin 1 [Source:HGNC Symbol;Acc:HGNC:12825]
ENSG00000102900	131.692	64.5373	NUP93	1.029	5.31e-07	1.19e-05	NUP93	nucleoporin 93 [Source:HGNC Symbol;Acc:HGNC:28958]
ENSG00000167258	181.515	88.8693	CDK12	1.0303	3.78e-09	1.17e-07	CDK12	cyclin dependent kinase 12 [Source:HGNC Symbol;Acc:HGNC:24224]
ENSG00000113739	233.491	114.246	STC2	1.0312	2.25e-11	9.02e-10	STC2	stanniocalcin 2 [Source:HGNC Symbol;Acc:HGNC:11374]
ENSG00000165732	412.043	200.504	DDX21	1.0392	3.89e-19	3.18e-17	DDX21	DExD-box helicase 21 [Source:HGNC Symbol;Acc:HGNC:2744]
ENSG00000110422	78.4588	38.1167	HIPK3	1.0415	9.32e-05	0.0013385	HIPK3	homeodomain interacting protein kinase 3 [Source:HGNC Symbol;Acc:HGNC:4915]
ENSG00000132780	250.368	121.451	NASP	1.0437	2.71e-12	1.16e-10	NASP	nuclear autoantigenic sperm protein [Source:HGNC Symbol;Acc:HGNC:7644]
ENSG00000112159	65.891	31.9554	MDN1	1.044	0.0003335	0.0040875	MDN1	midasin AAA ATPase 1 [Source:HGNC Symbol;Acc:HGNC:18302]
ENSG00000131153	67.866	32.8952	GINS2	1.0448	0.00026915	0.0034042	GINS2	GINS complex subunit 2 [Source:HGNC Symbol;Acc:HGNC:24575]
ENSG00000091127	73.5215	35.506	PUS7	1.0501	0.00014057	0.0019126	PUS7	pseudouridylate synthase 7 (putative) [Source:HGNC Symbol;Acc:HGNC:26033]
ENSG00000087586	183.759	88.556	AURKA	1.0532	1.61e-09	5.19e-08	AURKA	aurora kinase A [Source:HGNC Symbol;Acc:HGNC:11393]
ENSG00000136824	112.302	54.0944	SMC2	1.0538	2.38e-06	4.73e-05	SMC2	structural maintenance of chromosomes 2 [Source:HGNC Symbol;Acc:HGNC:14011]
ENSG00000062822	140.669	67.6702	POLD1	1.0557	1.23e-07	3.05e-06	POLD1	DNA polymerase delta 1, catalytic subunit [Source:HGNC Symbol;Acc:HGNC:9175]
ENSG00000018510	149.467	71.8473	AGPS	1.0568	4.88e-08	1.29e-06	AGPS	alkylglycerone phosphate synthase [Source:HGNC Symbol;Acc:HGNC:327]
ENSG00000101003	84.2041	40.4141	GINS1	1.059	4.1e-05	0.0006361	GINS1	GINS complex subunit 1 [Source:HGNC Symbol;Acc:HGNC:28980]
ENSG00000112118	197.134	94.4041	MCM3	1.0623	3.16e-10	1.11e-08	MCM3	minichromosome maintenance complex component 3 [Source:HGNC Symbol;Acc:HGNC:6945]
ENSG00000125885	92.2834	44.0692	MCM8	1.0663	1.58e-05	0.00026939	MCM8	minichromosome maintenance 8 homologous recombination repair factor [Source:HGNC Symbol;Acc:HGNC:16147]
ENSG00000066117	132.141	62.9709	SMARCD1	1.0693	2.25e-07	5.36e-06	SMARCD1	SWI/SNF related, matrix associated, actin dependent regulator of chromatin, subfamily d, member 1 [Source:HGNC Symbol;Acc:HGNC:11106]
ENSG00000135829	428.651	203.95	DHX9	1.0716	9.56e-21	8.88e-19	DHX9	DExH-box helicase 9 [Source:HGNC Symbol;Acc:HGNC:2750]
ENSG00000144354	100.811	47.933	CDCA7	1.0726	5.83e-06	0.00010879	CDCA7	cell division cycle associated 7 [Source:HGNC Symbol;Acc:HGNC:14628]
ENSG00000117395	146.504	69.6543	EBNA1BP2	1.0727	4.64e-08	1.23e-06	EBNA1BP2	EBNA1 binding protein 2 [Source:HGNC Symbol;Acc:HGNC:15531]
ENSG00000119787	124.331	59.107	ATL2	1.0728	4.79e-07	1.08e-05	ATL2	atlastin GTPase 2 [Source:HGNC Symbol;Acc:HGNC:24047]
ENSG00000171940	121.369	57.645	ZNF217	1.0741	6.39e-07	1.41e-05	ZNF217	zinc finger protein 217 [Source:HGNC Symbol;Acc:HGNC:13009]
ENSG00000116161	281.069	133.356	CACYBP	1.0756	3.31e-14	1.78e-12	CACYBP	calcyclin binding protein [Source:HGNC Symbol;Acc:HGNC:30423]
ENSG00000178209	914.934	433.486	PLEC	1.0777	8.9e-43	2.24e-40	PLEC	plectin [Source:HGNC Symbol;Acc:HGNC:9069]
ENSG00000138829	99.5547	47.0976	FBN2	1.0798	5.95e-06	0.00011104	FBN2	fibrillin 2 [Source:HGNC Symbol;Acc:HGNC:3604]
ENSG00000083312	378.918	178.574	TNPO1	1.0854	7.31e-19	5.77e-17	TNPO1	transportin 1 [Source:HGNC Symbol;Acc:HGNC:6401]
ENSG00000064393	222.629	104.22	HIPK2	1.095	7.62e-12	3.14e-10	HIPK2	homeodomain interacting protein kinase 2 [Source:HGNC Symbol;Acc:HGNC:14402]
ENSG00000089195	87.4358	40.8318	TRMT6	1.0985	1.7e-05	0.00028811	TRMT6	tRNA methyltransferase 6 [Source:HGNC Symbol;Acc:HGNC:20900]
ENSG00000165271	207.817	96.9104	NOL6	1.1006	3.13e-11	1.24e-09	NOL6	nucleolar protein 6 [Source:HGNC Symbol;Acc:HGNC:19910]
ENSG00000138134	60.7742	28.3003	STAMBPL1	1.1026	0.00032333	0.0039779	STAMBPL1	STAM binding protein like 1 [Source:HGNC Symbol;Acc:HGNC:24105]
ENSG00000105732	77.202	35.9237	ZNF574	1.1037	4.99e-05	0.00076182	ZNF574	zinc finger protein 574 [Source:HGNC Symbol;Acc:HGNC:26166]
ENSG00000001084	306.384	142.546	GCLC	1.1039	6.39e-16	4e-14	GCLC	glutamate-cysteine ligase catalytic subunit [Source:HGNC Symbol;Acc:HGNC:4311]
ENSG00000180198	144.529	67.148	RCC1	1.1059	2.72e-08	7.52e-07	RCC1	regulator of chromosome condensation 1 [Source:HGNC Symbol;Acc:HGNC:1913]
ENSG00000196363	137.797	64.0151	WDR5	1.1061	5.71e-08	1.5e-06	WDR5	WD repeat domain 5 [Source:HGNC Symbol;Acc:HGNC:12757]
ENSG00000122966	61.9412	28.7181	CIT	1.1089	0.00026603	0.0033713	CIT	citron rho-interacting serine/threonine kinase [Source:HGNC Symbol;Acc:HGNC:1985]
ENSG00000175216	288.43	133.669	CKAP5	1.1096	3.48e-15	2.04e-13	CKAP5	cytoskeleton associated protein 5 [Source:HGNC Symbol;Acc:HGNC:28959]
ENSG00000164151	97.5798	45.1134	ICE1	1.113	4.44e-06	8.44e-05	ICE1	interactor of little elongation complex ELL subunit 1 [Source:HGNC Symbol;Acc:HGNC:29154]
ENSG00000056097	201.533	93.1509	ZFR	1.1134	4.17e-11	1.63e-09	ZFR	zinc finger RNA binding protein [Source:HGNC Symbol;Acc:HGNC:17277]
ENSG00000079616	114.726	52.9456	KIF22	1.1156	6.18e-07	1.37e-05	KIF22	kinesin family member 22 [Source:HGNC Symbol;Acc:HGNC:6391]
ENSG00000068654	253.959	117.17	POLR1A	1.116	1.17e-13	5.9e-12	POLR1A	RNA polymerase I subunit A [Source:HGNC Symbol;Acc:HGNC:17264]
ENSG00000120802	244.353	112.679	TMPO	1.1167	3.28e-13	1.57e-11	TMPO	thymopoietin [Source:HGNC Symbol;Acc:HGNC:11875]
ENSG00000132383	234.389	107.98	RPA1	1.1181	9.4e-13	4.28e-11	RPA1	replication protein A1 [Source:HGNC Symbol;Acc:HGNC:10289]
ENSG00000178921	179.091	82.4991	PFAS	1.1182	4.36e-10	1.51e-08	PFAS	phosphoribosylformylglycinamidine synthase [Source:HGNC Symbol;Acc:HGNC:8863]
ENSG00000005100	136.989	63.0753	DHX33	1.1189	4.75e-08	1.26e-06	DHX33	DEAH-box helicase 33 [Source:HGNC Symbol;Acc:HGNC:16718]
ENSG00000136933	78.7281	36.237	RABEPK	1.1194	3.46e-05	0.00055055	RABEPK	Rab9 effector protein with kelch motifs [Source:HGNC Symbol;Acc:HGNC:16896]
ENSG00000105173	59.9662	27.5693	CCNE1	1.1211	0.00029674	0.0036835	CCNE1	cyclin E1 [Source:HGNC Symbol;Acc:HGNC:1589]
ENSG00000079819	76.4839	35.0882	EPB41L2	1.1242	4.22e-05	0.00065301	EPB41L2	erythrocyte membrane protein band 4.1 like 2 [Source:HGNC Symbol;Acc:HGNC:3379]
ENSG00000134057	273.798	125.524	CCNB1	1.1251	8.95e-15	5.03e-13	CCNB1	cyclin B1 [Source:HGNC Symbol;Acc:HGNC:1579]
ENSG00000083857	327.66	150.169	FAT1	1.1256	2.16e-17	1.55e-15	FAT1	FAT atypical cadherin 1 [Source:HGNC Symbol;Acc:HGNC:3595]
ENSG00000080345	112.482	51.4836	RIF1	1.1275	6.45e-07	1.42e-05	RIF1	replication timing regulatory factor 1 [Source:HGNC Symbol;Acc:HGNC:23207]
ENSG00000100697	94.5276	43.2337	DICER1	1.1286	4.97e-06	9.37e-05	DICER1	dicer 1, ribonuclease III [Source:HGNC Symbol;Acc:HGNC:17098]
ENSG00000010292	274.157	125.211	NCAPD2	1.1306	6.82e-15	3.87e-13	NCAPD2	non-SMC condensin I complex subunit D2 [Source:HGNC Symbol;Acc:HGNC:24305]
ENSG00000177084	135.014	61.6133	POLE	1.1318	4.52e-08	1.2e-06	POLE	DNA polymerase epsilon, catalytic subunit [Source:HGNC Symbol;Acc:HGNC:9177]
ENSG00000204217	69.3921	31.6421	BMPR2	1.1329	8.71e-05	0.0012588	BMPR2	bone morphogenetic protein receptor type 2 [Source:HGNC Symbol;Acc:HGNC:1078]
ENSG00000164070	63.557	28.9269	HSPA4L	1.1356	0.00016842	0.0022396	HSPA4L	heat shock protein family A (Hsp70) member 4 like [Source:HGNC Symbol;Acc:HGNC:17041]
ENSG00000088325	240.942	109.651	TPX2	1.1358	2.37e-13	1.15e-11	TPX2	TPX2, microtubule nucleation factor [Source:HGNC Symbol;Acc:HGNC:1249]
ENSG00000237649	65.1729	29.6579	KIFC1	1.1359	0.0001388	0.0018972	KIFC1	kinesin family member C1 [Source:HGNC Symbol;Acc:HGNC:6389]
ENSG00000197019	74.5089	33.8351	SERTAD1	1.1389	4.46e-05	0.00068496	SERTAD1	SERTA domain containing 1 [Source:HGNC Symbol;Acc:HGNC:17932]
ENSG00000129534	60.5946	27.4649	MIS18BP1	1.1416	0.00022571	0.0029136	MIS18BP1	MIS18 binding protein 1 [Source:HGNC Symbol;Acc:HGNC:20190]
ENSG00000196230	1025.89	464.501	TUBB	1.1431	3.71e-52	1.41e-49	TUBB	tubulin beta class I [Source:HGNC Symbol;Acc:HGNC:20778]
ENSG00000146676	82.3189	37.1768	PURB	1.1468	1.6e-05	0.00027219	PURB	purine rich element binding protein B [Source:HGNC Symbol;Acc:HGNC:9702]
ENSG00000082516	90.2187	40.7274	GEMIN5	1.1474	6.23e-06	0.00011499	GEMIN5	gem nuclear organelle associated protein 5 [Source:HGNC Symbol;Acc:HGNC:20043]
ENSG00000107130	94.9765	42.816	NCS1	1.1494	3.45e-06	6.66e-05	NCS1	neuronal calcium sensor 1 [Source:HGNC Symbol;Acc:HGNC:3953]
ENSG00000253729	463.482	208.859	PRKDC	1.15	1.07e-24	1.25e-22	PRKDC	protein kinase, DNA-activated, catalytic polypeptide [Source:HGNC Symbol;Acc:HGNC:9413]
ENSG00000121152	65.891	29.6579	NCAPH	1.1517	0.00010782	0.0015225	NCAPH	non-SMC condensin I complex subunit H [Source:HGNC Symbol;Acc:HGNC:1112]
ENSG00000163811	256.023	115.185	WDR43	1.1523	2.23e-14	1.21e-12	WDR43	WD repeat domain 43 [Source:HGNC Symbol;Acc:HGNC:28945]
ENSG00000151640	58.6197	26.3162	DPYSL4	1.1554	0.00025068	0.0032062	DPYSL4	dihydropyrimidinase like 4 [Source:HGNC Symbol;Acc:HGNC:3016]
ENSG00000136699	131.243	58.8981	SMPD4	1.156	4.23e-08	1.13e-06	SMPD4	sphingomyelin phosphodiesterase 4 [Source:HGNC Symbol;Acc:HGNC:32949]
ENSG00000124207	326.852	146.619	CSE1L	1.1566	5e-18	3.77e-16	CSE1L	chromosome segregation 1 like [Source:HGNC Symbol;Acc:HGNC:2431]
ENSG00000139496	84.8325	38.0123	NUP58	1.1582	1.02e-05	0.00018081	NUP58	nucleoporin 58 [Source:HGNC Symbol;Acc:HGNC:20261]
ENSG00000182481	640.956	287.181	KPNA2	1.1583	7.08e-34	1.2e-31	KPNA2	karyopherin subunit alpha 2 [Source:HGNC Symbol;Acc:HGNC:6395]
ENSG00000141076	154.494	69.1322	UTP4	1.1601	2.48e-09	7.8e-08	UTP4	UTP4, small subunit processome component [Source:HGNC Symbol;Acc:HGNC:1983]
ENSG00000174442	71.0079	31.7465	ZWILCH	1.1614	5.21e-05	0.00079259	ZWILCH	zwilch kinetochore protein [Source:HGNC Symbol;Acc:HGNC:25468]
ENSG00000126803	176.218	78.7397	HSPA2	1.1622	1.8e-10	6.49e-09	HSPA2	heat shock protein family A (Hsp70) member 2 [Source:HGNC Symbol;Acc:HGNC:5235]
ENSG00000125630	75.0476	33.5218	POLR1B	1.1627	3.14e-05	0.00050568	POLR1B	RNA polymerase I subunit B [Source:HGNC Symbol;Acc:HGNC:20454]
ENSG00000153317	241.122	107.667	ASAP1	1.1632	8.34e-14	4.26e-12	ASAP1	ArfGAP with SH3 domain, ankyrin repeat and PH domain 1 [Source:HGNC Symbol;Acc:HGNC:2720]
ENSG00000112578	77.4713	34.5661	BYSL	1.1643	2.29e-05	0.00038005	BYSL	bystin like [Source:HGNC Symbol;Acc:HGNC:1157]
ENSG00000161692	56.9141	25.3763	DBF4B	1.1653	0.00028173	0.003531	DBF4B	DBF4 zinc finger B [Source:HGNC Symbol;Acc:HGNC:17883]
ENSG00000108384	85.6404	38.1167	RAD51C	1.1679	8.11e-06	0.00014594	RAD51C	RAD51 paralog C [Source:HGNC Symbol;Acc:HGNC:9820]
ENSG00000169297	73.8806	32.7908	NR0B1	1.1719	3.24e-05	0.00051984	NR0B1	nuclear receptor subfamily 0 group B member 1 [Source:HGNC Symbol;Acc:HGNC:7960]
ENSG00000140263	65.891	29.2402	SORD	1.1721	8.67e-05	0.0012546	SORD	sorbitol dehydrogenase [Source:HGNC Symbol;Acc:HGNC:11184]
ENSG00000170525	826.69	366.233	PFKFB3	1.1746	4.25e-44	1.13e-41	PFKFB3	6-phosphofructo-2-kinase/fructose-2,6-biphosphatase 3 [Source:HGNC Symbol;Acc:HGNC:8874]
ENSG00000125871	108.891	48.1419	MGME1	1.1775	4.11e-07	9.44e-06	MGME1	mitochondrial genome maintenance exonuclease 1 [Source:HGNC Symbol;Acc:HGNC:16205]
ENSG00000168411	145.427	64.1196	RFWD3	1.1815	4.44e-09	1.35e-07	RFWD3	ring finger and WD repeat domain 3 [Source:HGNC Symbol;Acc:HGNC:25539]
ENSG00000179051	256.562	113.097	RCC2	1.1817	6.48e-15	3.69e-13	RCC2	regulator of chromosome condensation 2 [Source:HGNC Symbol;Acc:HGNC:30297]
ENSG00000126787	93.1811	41.0407	DLGAP5	1.183	2.59e-06	5.12e-05	DLGAP5	DLG associated protein 5 [Source:HGNC Symbol;Acc:HGNC:16864]
ENSG00000183684	206.56	90.9579	ALYREF	1.1833	2.55e-12	1.1e-10	ALYREF	Aly/REF export factor [Source:HGNC Symbol;Acc:HGNC:19071]
ENSG00000148019	61.3128	26.9428	CEP78	1.1863	0.00013282	0.0018302	CEP78	centrosomal protein 78 [Source:HGNC Symbol;Acc:HGNC:25740]
ENSG00000244462	143.632	63.0753	RBM12	1.1872	4.85e-09	1.47e-07	RBM12	RNA binding motif protein 12 [Source:HGNC Symbol;Acc:HGNC:9898]
ENSG00000253368	233.761	102.55	TRNP1	1.1887	7.82e-14	4.01e-12	TRNP1	TMF1-regulated nuclear protein 1 [Source:HGNC Symbol;Acc:HGNC:34348]
ENSG00000106462	75.4964	33.1041	EZH2	1.1894	2.15e-05	0.00035779	EZH2	enhancer of zeste 2 polycomb repressive complex 2 subunit [Source:HGNC Symbol;Acc:HGNC:3527]
ENSG00000139146	127.653	55.9741	FAM60A	1.1894	3.3e-08	8.97e-07	FAM60A	family with sequence similarity 60 member A [Source:HGNC Symbol;Acc:HGNC:30702]
ENSG00000221829	83.5757	36.5502	FANCG	1.1932	7.42e-06	0.00013473	FANCG	Fanconi anemia complementation group G [Source:HGNC Symbol;Acc:HGNC:3588]
ENSG00000163507	62.39	27.256	KIAA1524	1.1947	0.00010638	0.0015054	KIAA1524	KIAA1524 [Source:HGNC Symbol;Acc:HGNC:29302]
ENSG00000170315	277.299	121.138	UBB	1.1948	3.05e-16	1.97e-14	UBB	ubiquitin B [Source:HGNC Symbol;Acc:HGNC:12463]
ENSG00000108021	145.966	63.7019	FAM208B	1.1962	2.96e-09	9.28e-08	FAM208B	family with sequence similarity 208 member B [Source:HGNC Symbol;Acc:HGNC:23484]
ENSG00000186575	53.413	23.2877	NF2	1.1976	0.00032751	0.0040241	NF2	neurofibromin 2 [Source:HGNC Symbol;Acc:HGNC:7773]
ENSG00000175602	107.365	46.7843	CCDC85B	1.1984	3.47e-07	8.04e-06	CCDC85B	coiled-coil domain containing 85B [Source:HGNC Symbol;Acc:HGNC:24926]
ENSG00000076382	117.688	51.1703	SPAG5	1.2016	8.98e-08	2.27e-06	SPAG5	sperm associated antigen 5 [Source:HGNC Symbol;Acc:HGNC:13452]
ENSG00000055163	149.646	65.0594	CYFIP2	1.2017	1.65e-09	5.3e-08	CYFIP2	cytoplasmic FMR1 interacting protein 2 [Source:HGNC Symbol;Acc:HGNC:13760]
ENSG00000071282	78.0997	33.9395	LMCD1	1.2024	1.32e-05	0.00022862	LMCD1	LIM and cysteine rich domains 1 [Source:HGNC Symbol;Acc:HGNC:6633]
ENSG00000145386	69.5716	30.1801	CCNA2	1.2049	3.8e-05	0.0005957	CCNA2	cyclin A2 [Source:HGNC Symbol;Acc:HGNC:1578]
ENSG00000198794	64.9933	28.0915	SCAMP5	1.2102	6.48e-05	0.00096337	SCAMP5	secretory carrier membrane protein 5 [Source:HGNC Symbol;Acc:HGNC:30386]
ENSG00000114631	59.6969	25.794	PODXL2	1.2106	0.00012849	0.001782	PODXL2	podocalyxin like 2 [Source:HGNC Symbol;Acc:HGNC:17936]
ENSG00000140545	530.27	229.118	MFGE8	1.2106	3.53e-30	5.35e-28	MFGE8	milk fat globule-EGF factor 8 protein [Source:HGNC Symbol;Acc:HGNC:7036]
ENSG00000175643	54.221	23.3922	RMI2	1.2128	0.00025766	0.0032803	RMI2	RecQ mediated genome instability 2 [Source:HGNC Symbol;Acc:HGNC:28349]
ENSG00000110092	409.44	175.963	CCND1	1.2184	6.87e-24	7.7e-22	CCND1	cyclin D1 [Source:HGNC Symbol;Acc:HGNC:1582]
ENSG00000127564	54.8494	23.4966	PKMYT1	1.223	0.00021637	0.0027997	PKMYT1	protein kinase, membrane associated tyrosine/threonine 1 [Source:HGNC Symbol;Acc:HGNC:29650]
ENSG00000166508	603.343	258.149	MCM7	1.2248	1.1e-34	1.98e-32	MCM7	minichromosome maintenance complex component 7 [Source:HGNC Symbol;Acc:HGNC:6950]
ENSG00000123219	61.1332	26.1073	CENPK	1.2275	9e-05	0.0012981	CENPK	centromere protein K [Source:HGNC Symbol;Acc:HGNC:29479]
ENSG00000176014	171.101	72.5783	TUBB6	1.2372	4.37e-11	1.69e-09	TUBB6	tubulin beta 6 class V [Source:HGNC Symbol;Acc:HGNC:20776]
ENSG00000130816	207.278	87.6162	DNMT1	1.2423	3.41e-13	1.63e-11	DNMT1	DNA methyltransferase 1 [Source:HGNC Symbol;Acc:HGNC:2976]
ENSG00000166402	54.1312	22.87	TUB	1.243	0.00019907	0.0025992	TUB	tubby bipartite transcription factor [Source:HGNC Symbol;Acc:HGNC:12406]
ENSG00000134013	276.132	116.648	LOXL2	1.2432	4.32e-17	3.01e-15	LOXL2	lysyl oxidase like 2 [Source:HGNC Symbol;Acc:HGNC:6666]
ENSG00000125484	109.609	46.2622	GTF3C4	1.2445	1.17e-07	2.9e-06	GTF3C4	general transcription factor IIIC subunit 4 [Source:HGNC Symbol;Acc:HGNC:4667]
ENSG00000135766	271.195	114.35	EGLN1	1.2459	7.31e-17	5.04e-15	EGLN1	egl-9 family hypoxia inducible factor 1 [Source:HGNC Symbol;Acc:HGNC:1232]
ENSG00000119969	85.5506	35.9237	HELLS	1.2518	2.58e-06	5.09e-05	HELLS	helicase, lymphoid specific [Source:HGNC Symbol;Acc:HGNC:4861]
ENSG00000142945	73.8806	31.0155	KIF2C	1.2522	1.24e-05	0.00021611	KIF2C	kinesin family member 2C [Source:HGNC Symbol;Acc:HGNC:6393]
ENSG00000135905	90.3084	37.9078	DOCK10	1.2524	1.35e-06	2.8e-05	DOCK10	dedicator of cytokinesis 10 [Source:HGNC Symbol;Acc:HGNC:23479]
ENSG00000153574	56.8243	23.8099	RPIA	1.2549	0.00012342	0.0017205	RPIA	ribose 5-phosphate isomerase A [Source:HGNC Symbol;Acc:HGNC:10297]
ENSG00000123416	197.404	82.708	TUBA1B	1.2551	8.27e-13	3.8e-11	TUBA1B	tubulin alpha 1b [Source:HGNC Symbol;Acc:HGNC:18809]
ENSG00000013588	344.806	144.426	GPRC5A	1.2555	3.05e-21	2.96e-19	GPRC5A	G protein-coupled receptor class C group 5 member A [Source:HGNC Symbol;Acc:HGNC:9836]
ENSG00000175793	160.867	67.148	SFN	1.2605	9.09e-11	3.41e-09	SFN	stratifin [Source:HGNC Symbol;Acc:HGNC:10773]
ENSG00000137054	89.0516	37.0724	POLR1E	1.2643	1.34e-06	2.8e-05	POLR1E	RNA polymerase I subunit E [Source:HGNC Symbol;Acc:HGNC:17631]
ENSG00000188229	572.283	237.994	TUBB4B	1.2658	1.39e-34	2.48e-32	TUBB4B	tubulin beta 4B class IVb [Source:HGNC Symbol;Acc:HGNC:20771]
ENSG00000084090	260.512	108.293	STARD7	1.2664	1.26e-16	8.45e-15	STARD7	StAR related lipid transfer domain containing 7 [Source:HGNC Symbol;Acc:HGNC:18063]
ENSG00000163584	191.12	79.2618	RPL22L1	1.2698	1.21e-12	5.45e-11	RPL22L1	ribosomal protein L22 like 1 [Source:HGNC Symbol;Acc:HGNC:27610]
ENSG00000156970	56.7345	23.4966	BUB1B	1.2718	0.00010668	0.0015075	BUB1B	BUB1 mitotic checkpoint serine/threonine kinase B [Source:HGNC Symbol;Acc:HGNC:1149]
ENSG00000137574	52.246	21.6169	TGS1	1.2732	0.00019805	0.0025876	TGS1	trimethylguanosine synthase 1 [Source:HGNC Symbol;Acc:HGNC:17843]
ENSG00000169679	107.634	44.4869	BUB1	1.2747	8.97e-08	2.27e-06	BUB1	BUB1 mitotic checkpoint serine/threonine kinase [Source:HGNC Symbol;Acc:HGNC:1148]
ENSG00000155380	132.5	54.7209	SLC16A1	1.2758	2.92e-09	9.17e-08	SLC16A1	solute carrier family 16 member 1 [Source:HGNC Symbol;Acc:HGNC:10922]
ENSG00000124789	110.058	45.3223	NUP153	1.28	5.86e-08	1.54e-06	NUP153	nucleoporin 153 [Source:HGNC Symbol;Acc:HGNC:8062]
ENSG00000100297	223.527	91.6889	MCM5	1.2856	8.87e-15	5e-13	MCM5	minichromosome maintenance complex component 5 [Source:HGNC Symbol;Acc:HGNC:6948]
ENSG00000105974	333.764	136.698	CAV1	1.2878	2.35e-21	2.29e-19	CAV1	caveolin 1 [Source:HGNC Symbol;Acc:HGNC:1527]
ENSG00000135476	66.1603	27.0472	ESPL1	1.2905	2.33e-05	0.00038565	ESPL1	extra spindle pole bodies like 1, separase [Source:HGNC Symbol;Acc:HGNC:16856]
ENSG00000024526	51.6176	21.0947	DEPDC1	1.291	0.00018564	0.0024369	DEPDC1	DEP domain containing 1 [Source:HGNC Symbol;Acc:HGNC:22949]
ENSG00000101868	61.4923	25.063	POLA1	1.2948	4.34e-05	0.0006681	POLA1	DNA polymerase alpha 1, catalytic subunit [Source:HGNC Symbol;Acc:HGNC:9173]
ENSG00000138778	53.054	21.6169	CENPE	1.2953	0.00014532	0.0019675	CENPE	centromere protein E [Source:HGNC Symbol;Acc:HGNC:1856]
ENSG00000156802	114.816	46.5755	ATAD2	1.3017	2.03e-08	5.73e-07	ATAD2	ATPase family, AAA domain containing 2 [Source:HGNC Symbol;Acc:HGNC:30123]
ENSG00000108106	740.601	299.921	UBE2S	1.3041	3.42e-46	1.07e-43	UBE2S	ubiquitin conjugating enzyme E2 S [Source:HGNC Symbol;Acc:HGNC:17895]
ENSG00000142279	50.0916	20.2593	WTIP	1.306	0.00020395	0.0026557	WTIP	WT1 interacting protein [Source:HGNC Symbol;Acc:HGNC:20964]
ENSG00000276023	68.4944	27.6738	DUSP14	1.3075	1.38e-05	0.00023828	DUSP14	dual specificity phosphatase 14 [Source:HGNC Symbol;Acc:HGNC:17007]
ENSG00000116062	202.521	81.7681	MSH6	1.3085	7.49e-14	3.86e-12	MSH6	mutS homolog 6 [Source:HGNC Symbol;Acc:HGNC:7329]
ENSG00000135679	185.195	74.7714	MDM2	1.3085	8.56e-13	3.93e-11	MDM2	MDM2 proto-oncogene [Source:HGNC Symbol;Acc:HGNC:6973]
ENSG00000100292	577.579	232.355	HMOX1	1.3137	8.75e-37	1.77e-34	HMOX1	heme oxygenase 1 [Source:HGNC Symbol;Acc:HGNC:5013]
ENSG00000112984	67.3274	27.0472	KIF20A	1.3157	1.49e-05	0.00025554	KIF20A	kinesin family member 20A [Source:HGNC Symbol;Acc:HGNC:9787]
ENSG00000113810	150.454	60.3601	SMC4	1.3177	9.18e-11	3.43e-09	SMC4	structural maintenance of chromosomes 4 [Source:HGNC Symbol;Acc:HGNC:14013]
ENSG00000163171	90.847	36.4458	CDC42EP3	1.3177	4.77e-07	1.08e-05	CDC42EP3	CDC42 effector protein 3 [Source:HGNC Symbol;Acc:HGNC:16943]
ENSG00000091651	71.2772	28.5092	ORC6	1.322	7.79e-06	0.00014071	ORC6	origin recognition complex subunit 6 [Source:HGNC Symbol;Acc:HGNC:17151]
ENSG00000164938	51.3483	20.4681	TP53INP1	1.3269	0.00014167	0.0019249	TP53INP1	tumor protein p53 inducible nuclear protein 1 [Source:HGNC Symbol;Acc:HGNC:18022]
ENSG00000095002	127.383	50.7526	MSH2	1.3276	2.02e-09	6.43e-08	MSH2	mutS homolog 2 [Source:HGNC Symbol;Acc:HGNC:7325]
ENSG00000113368	130.525	51.7969	LMNB1	1.3334	1.14e-09	3.76e-08	LMNB1	lamin B1 [Source:HGNC Symbol;Acc:HGNC:6637]
ENSG00000104381	55.0289	21.8257	GDAP1	1.3342	7.65e-05	0.0011233	GDAP1	ganglioside induced differentiation associated protein 1 [Source:HGNC Symbol;Acc:HGNC:15968]
ENSG00000090905	132.41	52.4235	TNRC6A	1.3367	8.04e-10	2.69e-08	TNRC6A	trinucleotide repeat containing 6A [Source:HGNC Symbol;Acc:HGNC:11969]
ENSG00000137807	179.629	71.1163	KIF23	1.3368	8.27e-13	3.8e-11	KIF23	kinesin family member 23 [Source:HGNC Symbol;Acc:HGNC:6392]
ENSG00000156113	70.2898	27.7782	KCNMA1	1.3394	7.36e-06	0.00013382	KCNMA1	potassium calcium-activated channel subfamily M alpha 1 [Source:HGNC Symbol;Acc:HGNC:6284]
ENSG00000198554	47.0394	18.5884	WDHD1	1.3395	0.00024488	0.003134	WDHD1	WD repeat and HMG-box DNA binding protein 1 [Source:HGNC Symbol;Acc:HGNC:23170]
ENSG00000087510	61.4025	24.2276	TFAP2C	1.3416	2.72e-05	0.00044576	TFAP2C	transcription factor AP-2 gamma [Source:HGNC Symbol;Acc:HGNC:11744]
ENSG00000196850	51.079	20.1549	PPTC7	1.3416	0.00013007	0.0018013	PPTC7	PTC7 protein phosphatase homolog [Source:HGNC Symbol;Acc:HGNC:30695]
ENSG00000111445	58.7992	23.1833	RFC5	1.3427	3.99e-05	0.00062241	RFC5	replication factor C subunit 5 [Source:HGNC Symbol;Acc:HGNC:9973]
ENSG00000145907	428.022	168.549	G3BP1	1.3445	1.32e-28	1.86e-26	G3BP1	G3BP stress granule assembly factor 1 [Source:HGNC Symbol;Acc:HGNC:30292]
ENSG00000134504	59.1583	23.2877	KCTD1	1.345	3.7e-05	0.0005819	KCTD1	potassium channel tetramerization domain containing 1 [Source:HGNC Symbol;Acc:HGNC:18249]
ENSG00000160606	46.7701	18.3796	TLCD1	1.3475	0.00023949	0.0030731	TLCD1	TLC domain containing 1 [Source:HGNC Symbol;Acc:HGNC:25177]
ENSG00000138119	679.557	267.026	MYOF	1.3476	1.44e-44	4e-42	MYOF	myoferlin [Source:HGNC Symbol;Acc:HGNC:3656]
ENSG00000090889	99.5547	39.0566	KIF4A	1.3499	8.03e-08	2.04e-06	KIF4A	kinesin family member 4A [Source:HGNC Symbol;Acc:HGNC:13339]
ENSG00000140525	143.003	55.9741	FANCI	1.3532	1.17e-10	4.31e-09	FANCI	Fanconi anemia complementation group I [Source:HGNC Symbol;Acc:HGNC:25568]
ENSG00000095319	130.974	51.1703	NUP188	1.3559	6.6e-10	2.24e-08	NUP188	nucleoporin 188 [Source:HGNC Symbol;Acc:HGNC:17859]
ENSG00000101412	105.3	41.0407	E2F1	1.3594	2.9e-08	7.97e-07	E2F1	E2F transcription factor 1 [Source:HGNC Symbol;Acc:HGNC:3113]
ENSG00000176697	97.5798	38.0123	BDNF	1.3601	9.16e-08	2.31e-06	BDNF	brain derived neurotrophic factor [Source:HGNC Symbol;Acc:HGNC:1033]
ENSG00000179409	127.114	49.4995	GEMIN4	1.3606	1.06e-09	3.53e-08	GEMIN4	gem nuclear organelle associated protein 4 [Source:HGNC Symbol;Acc:HGNC:15717]
ENSG00000146918	126.127	49.0818	NCAPG2	1.3616	1.21e-09	3.98e-08	NCAPG2	non-SMC condensin II complex subunit G2 [Source:HGNC Symbol;Acc:HGNC:21904]
ENSG00000161800	139.861	54.4077	RACGAP1	1.3621	1.52e-10	5.54e-09	RACGAP1	Rac GTPase activating protein 1 [Source:HGNC Symbol;Acc:HGNC:9804]
ENSG00000133119	80.6133	31.3288	RFC3	1.3635	1.15e-06	2.43e-05	RFC3	replication factor C subunit 3 [Source:HGNC Symbol;Acc:HGNC:9971]
ENSG00000228716	204.496	79.4707	DHFR	1.3636	9.27e-15	5.2e-13	DHFR	dihydrofolate reductase [Source:HGNC Symbol;Acc:HGNC:2861]
ENSG00000179041	157.815	61.3	RRS1	1.3643	9.78e-12	3.98e-10	RRS1	ribosome biogenesis regulator homolog [Source:HGNC Symbol;Acc:HGNC:17083]
ENSG00000151503	70.7386	27.4649	NCAPD3	1.3649	5.1e-06	9.61e-05	NCAPD3	non-SMC condensin II complex subunit D3 [Source:HGNC Symbol;Acc:HGNC:28952]
ENSG00000198142	54.4005	21.0947	SOWAHC	1.3667	6.25e-05	0.00093436	SOWAHC	sosondowah ankyrin repeat domain family member C [Source:HGNC Symbol;Acc:HGNC:26149]
ENSG00000151835	71.8158	27.7782	SACS	1.3703	4.05e-06	7.74e-05	SACS	sacsin molecular chaperone [Source:HGNC Symbol;Acc:HGNC:10519]
ENSG00000167601	278.556	107.667	AXL	1.3714	1.06e-19	9.21e-18	AXL	AXL receptor tyrosine kinase [Source:HGNC Symbol;Acc:HGNC:905]
ENSG00000149503	105.3	40.623	INCENP	1.3741	2.24e-08	6.28e-07	INCENP	inner centromere protein [Source:HGNC Symbol;Acc:HGNC:6058]
ENSG00000074047	83.0371	31.9554	GLI2	1.3777	6.52e-07	1.43e-05	GLI2	GLI family zinc finger 2 [Source:HGNC Symbol;Acc:HGNC:4318]
ENSG00000167900	268.142	103.072	TK1	1.3794	3.59e-19	2.95e-17	TK1	thymidine kinase 1 [Source:HGNC Symbol;Acc:HGNC:11830]
ENSG00000115129	256.921	98.6857	TP53I3	1.3804	1.88e-18	1.44e-16	TP53I3	tumor protein p53 inducible protein 3 [Source:HGNC Symbol;Acc:HGNC:19373]
ENSG00000120800	95.9639	36.7591	UTP20	1.3844	7.98e-08	2.03e-06	UTP20	UTP20, small subunit processome component [Source:HGNC Symbol;Acc:HGNC:17897]
ENSG00000198826	193.544	73.9359	ARHGAP11A	1.3883	2.19e-14	1.19e-12	ARHGAP11A	Rho GTPase activating protein 11A [Source:HGNC Symbol;Acc:HGNC:15783]
ENSG00000187079	358.989	136.907	TEAD1	1.3907	2.06e-25	2.52e-23	TEAD1	TEA domain transcription factor 1 [Source:HGNC Symbol;Acc:HGNC:11714]
ENSG00000234171	49.0143	18.6928	RNASEH1-AS1	1.3907	0.00011867	0.0016606	RNASEH1-AS1	RNASEH1 antisense RNA 1 [Source:HGNC Symbol;Acc:HGNC:49289]
ENSG00000111665	65.1729	24.8542	CDCA3	1.3908	9.06e-06	0.00016165	CDCA3	cell division cycle associated 3 [Source:HGNC Symbol;Acc:HGNC:14624]
ENSG00000176619	384.394	146.514	LMNB2	1.3915	4.08e-27	5.5e-25	LMNB2	lamin B2 [Source:HGNC Symbol;Acc:HGNC:6638]
ENSG00000270647	557.381	212.2	TAF15	1.3932	1.25e-38	2.82e-36	TAF15	TATA-box binding protein associated factor 15 [Source:HGNC Symbol;Acc:HGNC:11547]
ENSG00000124882	230.798	87.825	EREG	1.3939	5.93e-17	4.13e-15	EREG	epiregulin [Source:HGNC Symbol;Acc:HGNC:3443]
ENSG00000153207	123.433	46.8887	AHCTF1	1.3964	8.99e-10	3e-08	AHCTF1	AT-hook containing transcription factor 1 [Source:HGNC Symbol;Acc:HGNC:24618]
ENSG00000138160	152.25	57.7494	KIF11	1.3986	9.65e-12	3.93e-10	KIF11	kinesin family member 11 [Source:HGNC Symbol;Acc:HGNC:6388]
ENSG00000164687	117.06	44.3824	FABP5	1.3992	2.31e-09	7.27e-08	FABP5	fatty acid binding protein 5 [Source:HGNC Symbol;Acc:HGNC:3560]
ENSG00000071539	99.9138	37.8034	TRIP13	1.4022	3.23e-08	8.81e-07	TRIP13	thyroid hormone receptor interactor 13 [Source:HGNC Symbol;Acc:HGNC:12307]
ENSG00000155561	183.669	69.4455	NUP205	1.4032	6.4e-14	3.33e-12	NUP205	nucleoporin 205 [Source:HGNC Symbol;Acc:HGNC:18658]
ENSG00000108854	74.4192	28.0915	SMURF2	1.4055	1.76e-06	3.58e-05	SMURF2	SMAD specific E3 ubiquitin protein ligase 2 [Source:HGNC Symbol;Acc:HGNC:16809]
ENSG00000104738	339.42	127.613	MCM4	1.4113	1.33e-24	1.54e-22	MCM4	minichromosome maintenance complex component 4 [Source:HGNC Symbol;Acc:HGNC:6947]
ENSG00000146834	150.724	56.6007	MEPCE	1.413	8.58e-12	3.52e-10	MEPCE	methylphosphate capping enzyme [Source:HGNC Symbol;Acc:HGNC:20247]
ENSG00000165304	130.166	48.8729	MELK	1.4132	2.2e-10	7.88e-09	MELK	maternal embryonic leucine zipper kinase [Source:HGNC Symbol;Acc:HGNC:16870]
ENSG00000104529	175.68	65.8949	EEF1D	1.4147	1.6e-13	7.95e-12	EEF1D	eukaryotic translation elongation factor 1 delta [Source:HGNC Symbol;Acc:HGNC:3211]
ENSG00000006062	74.2396	27.7782	MAP3K14	1.4182	1.55e-06	3.17e-05	MAP3K14	mitogen-activated protein kinase kinase kinase 14 [Source:HGNC Symbol;Acc:HGNC:6853]
ENSG00000168078	149.377	55.6608	PBK	1.4242	8.07e-12	3.33e-10	PBK	PDZ binding kinase [Source:HGNC Symbol;Acc:HGNC:18282]
ENSG00000076248	188.158	69.9676	UNG	1.4272	1.53e-14	8.41e-13	UNG	uracil DNA glycosylase [Source:HGNC Symbol;Acc:HGNC:12572]
ENSG00000175063	182.592	67.879	UBE2C	1.4276	3.67e-14	1.96e-12	UBE2C	ubiquitin conjugating enzyme E2 C [Source:HGNC Symbol;Acc:HGNC:15937]
ENSG00000197299	50.8995	18.9017	BLM	1.4291	6.31e-05	0.00093978	BLM	Bloom syndrome RecQ like helicase [Source:HGNC Symbol;Acc:HGNC:1058]
ENSG00000105810	121.369	45.009	CDK6	1.4311	6.22e-10	2.12e-08	CDK6	cyclin dependent kinase 6 [Source:HGNC Symbol;Acc:HGNC:1777]
ENSG00000008405	43.3588	15.9777	CRY1	1.4403	0.00020428	0.002657	CRY1	cryptochrome circadian clock 1 [Source:HGNC Symbol;Acc:HGNC:2384]
ENSG00000131747	789.795	289.896	TOP2A	1.4459	6.48e-57	2.86e-54	TOP2A	topoisomerase (DNA) II alpha [Source:HGNC Symbol;Acc:HGNC:11989]
ENSG00000148773	285.648	104.116	MKI67	1.456	7.39e-22	7.47e-20	MKI67	marker of proliferation Ki-67 [Source:HGNC Symbol;Acc:HGNC:7107]
ENSG00000146670	129.538	47.0976	CDCA5	1.4596	9.08e-11	3.41e-09	CDCA5	cell division cycle associated 5 [Source:HGNC Symbol;Acc:HGNC:14626]
ENSG00000181026	265.539	96.2838	AEN	1.4636	1.43e-20	1.31e-18	AEN	apoptosis enhancing nuclease [Source:HGNC Symbol;Acc:HGNC:25722]
ENSG00000106144	55.0289	19.946	CASP2	1.4641	2.3e-05	0.0003806	CASP2	caspase 2 [Source:HGNC Symbol;Acc:HGNC:1503]
ENSG00000105011	64.365	23.1833	ASF1B	1.4732	4.24e-06	8.07e-05	ASF1B	anti-silencing function 1B histone chaperone [Source:HGNC Symbol;Acc:HGNC:20996]
ENSG00000073111	198.212	71.0119	MCM2	1.4809	5.42e-16	3.41e-14	MCM2	minichromosome maintenance complex component 2 [Source:HGNC Symbol;Acc:HGNC:6944]
ENSG00000164109	82.2291	29.4491	MAD2L1	1.4814	1.79e-07	4.34e-06	MAD2L1	mitotic arrest deficient 2 like 1 [Source:HGNC Symbol;Acc:HGNC:6763]
ENSG00000188486	261.948	93.7775	H2AFX	1.482	1.18e-20	1.08e-18	H2AFX	H2A histone family member X [Source:HGNC Symbol;Acc:HGNC:4739]
ENSG00000094804	146.235	52.3191	CDC6	1.4829	3.27e-12	1.39e-10	CDC6	cell division cycle 6 [Source:HGNC Symbol;Acc:HGNC:1744]
ENSG00000117724	214.55	76.6511	CENPF	1.4849	3.03e-17	2.14e-15	CENPF	centromere protein F [Source:HGNC Symbol;Acc:HGNC:1857]
ENSG00000132017	40.6657	14.5157	DCAF15	1.4862	0.0002342	0.0030133	DCAF15	DDB1 and CUL4 associated factor 15 [Source:HGNC Symbol;Acc:HGNC:25095]
ENSG00000123485	226.669	80.8283	HJURP	1.4877	3.55e-18	2.7e-16	HJURP	Holliday junction recognition protein [Source:HGNC Symbol;Acc:HGNC:25444]
ENSG00000162616	37.7931	13.4714	DNAJB4	1.4882	0.00038511	0.0046294	DNAJB4	DnaJ heat shock protein family (Hsp40) member B4 [Source:HGNC Symbol;Acc:HGNC:14886]
ENSG00000118193	60.5048	21.5124	KIF14	1.4919	6.8e-06	0.00012484	KIF14	kinesin family member 14 [Source:HGNC Symbol;Acc:HGNC:19181]
ENSG00000011426	154.673	54.5121	ANLN	1.5046	4.53e-13	2.14e-11	ANLN	anillin actin binding protein [Source:HGNC Symbol;Acc:HGNC:14082]
ENSG00000040275	115.175	40.5186	SPDL1	1.5072	4e-10	1.4e-08	SPDL1	spindle apparatus coiled-coil protein 1 [Source:HGNC Symbol;Acc:HGNC:26010]
ENSG00000123473	37.7033	13.1581	STIL	1.5187	0.00032097	0.0039515	STIL	STIL, centriolar assembly protein [Source:HGNC Symbol;Acc:HGNC:10879]
ENSG00000128059	63.7366	22.2434	PPAT	1.5187	2.9e-06	5.66e-05	PPAT	phosphoribosyl pyrophosphate amidotransferase [Source:HGNC Symbol;Acc:HGNC:9238]
ENSG00000075702	143.183	49.9172	WDR62	1.5202	2.28e-12	9.87e-11	WDR62	WD repeat domain 62 [Source:HGNC Symbol;Acc:HGNC:24502]
ENSG00000159388	46.8598	16.291	BTG2	1.5243	5.79e-05	0.00087036	BTG2	BTG anti-proliferation factor 2 [Source:HGNC Symbol;Acc:HGNC:1131]
ENSG00000174371	46.3212	16.0821	EXO1	1.5262	6.29e-05	0.00093893	EXO1	exonuclease 1 [Source:HGNC Symbol;Acc:HGNC:3511]
ENSG00000111206	126.755	43.9647	FOXM1	1.5276	3.49e-11	1.38e-09	FOXM1	forkhead box M1 [Source:HGNC Symbol;Acc:HGNC:3818]
ENSG00000159055	48.745	16.7087	MIS18A	1.5447	3.47e-05	0.00055108	MIS18A	MIS18 kinetochore protein A [Source:HGNC Symbol;Acc:HGNC:1286]
ENSG00000068097	52.8744	18.0663	HEATR6	1.5493	1.55e-05	0.00026472	HEATR6	HEAT repeat containing 6 [Source:HGNC Symbol;Acc:HGNC:24076]
ENSG00000170779	95.6946	32.6864	CDCA4	1.5497	6.07e-09	1.82e-07	CDCA4	cell division cycle associated 4 [Source:HGNC Symbol;Acc:HGNC:14625]
ENSG00000124641	39.2294	13.3669	MED20	1.5533	0.00019229	0.0025191	MED20	mediator complex subunit 20 [Source:HGNC Symbol;Acc:HGNC:16840]
ENSG00000161513	282.057	96.0749	FDXR	1.5538	1.5e-23	1.65e-21	FDXR	ferredoxin reductase [Source:HGNC Symbol;Acc:HGNC:3642]
ENSG00000109805	55.2084	18.7973	NCAPG	1.5544	9.6e-06	0.00017049	NCAPG	non-SMC condensin I complex subunit G [Source:HGNC Symbol;Acc:HGNC:24304]
ENSG00000174010	47.578	16.1865	KLHL15	1.5555	3.94e-05	0.00061561	KLHL15	kelch like family member 15 [Source:HGNC Symbol;Acc:HGNC:29347]
ENSG00000136108	92.3731	31.3288	CKAP2	1.56	9.49e-09	2.79e-07	CKAP2	cytoskeleton associated protein 2 [Source:HGNC Symbol;Acc:HGNC:1990]
ENSG00000152104	62.0309	20.9903	PTPN14	1.5633	2.47e-06	4.9e-05	PTPN14	protein tyrosine phosphatase, non-receptor type 14 [Source:HGNC Symbol;Acc:HGNC:9647]
ENSG00000198879	70.3795	23.7054	SFMBT2	1.5699	4.84e-07	1.09e-05	SFMBT2	Scm-like with four mbt domains 2 [Source:HGNC Symbol;Acc:HGNC:20256]
ENSG00000132436	47.3985	15.8733	FIGNL1	1.5782	3.39e-05	0.00054156	FIGNL1	fidgetin like 1 [Source:HGNC Symbol;Acc:HGNC:13286]
ENSG00000213551	67.5069	22.4523	DNAJC9	1.5882	6.73e-07	1.48e-05	DNAJC9	DnaJ heat shock protein family (Hsp40) member C9 [Source:HGNC Symbol;Acc:HGNC:19123]
ENSG00000115738	186.811	61.5088	ID2	1.6027	8.86e-17	6.05e-15	ID2	inhibitor of DNA binding 2, HLH protein [Source:HGNC Symbol;Acc:HGNC:5361]
ENSG00000244306	120.561	39.6831	DUXAP10	1.6032	2.32e-11	9.28e-10	DUXAP10	double homeobox A pseudogene 10 [Source:NCBI gene;Acc:503639]
ENSG00000182253	117.958	38.7433	SYNM	1.6063	3.58e-11	1.41e-09	SYNM	synemin [Source:HGNC Symbol;Acc:HGNC:24466]
ENSG00000196584	43.8077	14.3068	XRCC2	1.6145	5.14e-05	0.00078275	XRCC2	X-ray repair cross complementing 2 [Source:HGNC Symbol;Acc:HGNC:12829]
ENSG00000138182	61.8514	20.0504	KIF20B	1.6252	1.34e-06	2.8e-05	KIF20B	kinesin family member 20B [Source:HGNC Symbol;Acc:HGNC:7212]
ENSG00000234616	54.6698	17.5441	JRK	1.6398	4.82e-06	9.11e-05	JRK	Jrk helix-turn-helix protein [Source:HGNC Symbol;Acc:HGNC:6199]
ENSG00000166483	66.0706	21.1991	WEE1	1.64	4.98e-07	1.12e-05	WEE1	WEE1 G2 checkpoint kinase [Source:HGNC Symbol;Acc:HGNC:12761]
ENSG00000140534	46.3212	14.829	TICRR	1.6433	2.5e-05	0.00041075	TICRR	TOPBP1 interacting checkpoint and replication regulator [Source:HGNC Symbol;Acc:HGNC:28704]
ENSG00000178999	171.819	54.4077	AURKB	1.659	3.03e-16	1.96e-14	AURKB	aurora kinase B [Source:HGNC Symbol;Acc:HGNC:11390]
ENSG00000184661	67.058	20.9903	CDCA2	1.6757	2.74e-07	6.42e-06	CDCA2	cell division cycle associated 2 [Source:HGNC Symbol;Acc:HGNC:14623]
ENSG00000085840	40.4862	12.6359	ORC1	1.6799	6.3e-05	0.00093978	ORC1	origin recognition complex subunit 1 [Source:HGNC Symbol;Acc:HGNC:8487]
ENSG00000186185	124.96	38.9521	KIF18B	1.6817	2e-12	8.73e-11	KIF18B	kinesin family member 18B [Source:HGNC Symbol;Acc:HGNC:27102]
ENSG00000136492	32.5864	10.1296	BRIP1	1.6857	0.00032051	0.0039482	BRIP1	BRCA1 interacting protein C-terminal helicase 1 [Source:HGNC Symbol;Acc:HGNC:20473]
ENSG00000068489	87.1665	27.0472	PRR11	1.6883	3.83e-09	1.18e-07	PRR11	proline rich 11 [Source:HGNC Symbol;Acc:HGNC:25619]
ENSG00000175567	224.155	69.5499	UCP2	1.6884	3.46e-21	3.32e-19	UCP2	uncoupling protein 2 [Source:HGNC Symbol;Acc:HGNC:12518]
ENSG00000177469	703.795	218.257	CAVIN1	1.6891	5.83e-63	2.9e-60	CAVIN1	caveolae associated protein 1 [Source:HGNC Symbol;Acc:HGNC:9688]
ENSG00000168014	95.8742	29.6579	C2CD3	1.6927	6.03e-10	2.07e-08	C2CD3	C2 calcium dependent domain containing 3 [Source:HGNC Symbol;Acc:HGNC:24564]
ENSG00000121621	85.8199	26.1073	KIF18A	1.7169	3.36e-09	1.05e-07	KIF18A	kinesin family member 18A [Source:HGNC Symbol;Acc:HGNC:29441]
ENSG00000117399	221.821	67.4613	CDC20	1.7173	1.94e-21	1.9e-19	CDC20	cell division cycle 20 [Source:HGNC Symbol;Acc:HGNC:1723]
ENSG00000170836	46.7701	14.2024	PPM1D	1.7195	1.25e-05	0.00021666	PPM1D	protein phosphatase, Mg2+/Mn2+ dependent 1D [Source:HGNC Symbol;Acc:HGNC:9277]
ENSG00000051341	44.4361	13.4714	POLQ	1.7218	2.02e-05	0.00033746	POLQ	DNA polymerase theta [Source:HGNC Symbol;Acc:HGNC:9186]
ENSG00000134690	77.6509	23.4966	CDCA8	1.7246	1.68e-08	4.79e-07	CDCA8	cell division cycle associated 8 [Source:HGNC Symbol;Acc:HGNC:14629]
ENSG00000184226	132.5	39.9964	PCDH9	1.7281	1.59e-13	7.91e-12	PCDH9	protocadherin 9 [Source:HGNC Symbol;Acc:HGNC:8661]
ENSG00000124942	522.46	156.957	AHNAK	1.735	6.89e-49	2.39e-46	AHNAK	AHNAK nucleoprotein [Source:HGNC Symbol;Acc:HGNC:347]
ENSG00000198743	42.8202	12.8448	SLC5A3	1.7371	2.55e-05	0.00041901	SLC5A3	solute carrier family 5 member 3 [Source:HGNC Symbol;Acc:HGNC:11038]
ENSG00000165490	37.7931	11.2784	DDIAS	1.7446	7.29e-05	0.0010775	DDIAS	DNA damage induced apoptosis suppressor [Source:HGNC Symbol;Acc:HGNC:26351]
ENSG00000137812	31.3297	9.29421	KNL1	1.7531	0.00029051	0.0036154	KNL1	kinetochore scaffold 1 [Source:HGNC Symbol;Acc:HGNC:24054]
ENSG00000164045	33.1251	9.71192	CDC25A	1.7701	0.00017663	0.0023345	CDC25A	cell division cycle 25A [Source:HGNC Symbol;Acc:HGNC:1725]
ENSG00000114019	189.504	55.3475	AMOTL2	1.7756	2.49e-19	2.08e-17	AMOTL2	angiomotin like 2 [Source:HGNC Symbol;Acc:HGNC:17812]
ENSG00000166923	33.3046	9.71192	GREM1	1.7779	0.00016222	0.0021677	GREM1	gremlin 1, DAN family BMP antagonist [Source:HGNC Symbol;Acc:HGNC:2001]
ENSG00000142731	42.8202	12.4271	PLK4	1.7848	1.81e-05	0.00030429	PLK4	polo like kinase 4 [Source:HGNC Symbol;Acc:HGNC:11397]
ENSG00000181222	514.291	147.245	POLR2A	1.8044	1.15e-50	4.13e-48	POLR2A	RNA polymerase II subunit A [Source:HGNC Symbol;Acc:HGNC:9187]
ENSG00000171793	241.301	68.61	CTPS1	1.8143	7.71e-25	9.18e-23	CTPS1	CTP synthase 1 [Source:HGNC Symbol;Acc:HGNC:2519]
ENSG00000092853	34.3818	9.71192	CLSPN	1.8238	9.7e-05	0.0013861	CLSPN	claspin [Source:HGNC Symbol;Acc:HGNC:19715]
ENSG00000065328	74.6885	21.0947	MCM10	1.824	9.16e-09	2.7e-07	MCM10	minichromosome maintenance 10 replication initiation factor [Source:HGNC Symbol;Acc:HGNC:18043]
ENSG00000218336	29.8036	8.35434	TENM3	1.8349	0.00026871	0.0034031	TENM3	teneurin transmembrane protein 3 [Source:HGNC Symbol;Acc:HGNC:29944]
ENSG00000154127	175.68	49.0818	UBASH3B	1.8397	7.85e-19	6.14e-17	UBASH3B	ubiquitin associated and SH3 domain containing B [Source:HGNC Symbol;Acc:HGNC:29884]
ENSG00000101447	113.828	31.7465	FAM83D	1.8422	9.34e-13	4.27e-11	FAM83D	family with sequence similarity 83 member D [Source:HGNC Symbol;Acc:HGNC:16122]
ENSG00000165480	39.0499	10.8606	SKA3	1.8462	2.82e-05	0.00045915	SKA3	spindle and kinetochore associated complex subunit 3 [Source:HGNC Symbol;Acc:HGNC:20262]
ENSG00000175573	82.0496	22.7656	C11orf68	1.8496	1.22e-09	4e-08	C11orf68	chromosome 11 open reading frame 68 [Source:HGNC Symbol;Acc:HGNC:28801]
ENSG00000133816	143.452	39.7876	MICAL2	1.8502	9.11e-16	5.58e-14	MICAL2	microtubule associated monooxygenase, calponin and LIM domain containing 2 [Source:HGNC Symbol;Acc:HGNC:24693]
ENSG00000035499	49.912	13.7847	DEPDC1B	1.8563	2.02e-06	4.06e-05	DEPDC1B	DEP domain containing 1B [Source:HGNC Symbol;Acc:HGNC:24902]
ENSG00000059804	140.131	38.6388	SLC2A3	1.8586	1.6e-15	9.67e-14	SLC2A3	solute carrier family 2 member 3 [Source:HGNC Symbol;Acc:HGNC:11007]
ENSG00000126003	57.0038	15.4555	PLAGL2	1.8829	2.96e-07	6.93e-06	PLAGL2	PLAG1 like zinc finger 2 [Source:HGNC Symbol;Acc:HGNC:9047]
ENSG00000131018	54.4005	14.7245	SYNE1	1.8854	5.4e-07	1.21e-05	SYNE1	spectrin repeat containing nuclear envelope protein 1 [Source:HGNC Symbol;Acc:HGNC:17089]
ENSG00000113356	47.3087	12.7404	POLR3G	1.8927	2.79e-06	5.47e-05	POLR3G	RNA polymerase III subunit G [Source:HGNC Symbol;Acc:HGNC:30075]
ENSG00000276043	47.3985	12.5315	UHRF1	1.9193	2.22e-06	4.43e-05	UHRF1	ubiquitin like with PHD and ring finger domains 1 [Source:HGNC Symbol;Acc:HGNC:12556]
ENSG00000148219	27.4696	7.20562	ASTN2	1.9306	0.00029847	0.0037026	ASTN2	astrotactin 2 [Source:HGNC Symbol;Acc:HGNC:17021]
ENSG00000214517	288.251	74.0404	PPME1	1.9609	2.59e-32	4.22e-30	PPME1	protein phosphatase methylesterase 1 [Source:HGNC Symbol;Acc:HGNC:30178]
ENSG00000138092	64.2752	16.291	CENPO	1.9802	1.88e-08	5.3e-07	CENPO	centromere protein O [Source:HGNC Symbol;Acc:HGNC:28152]
ENSG00000242265	825.882	208.65	PEG10	1.9849	1.18e-90	9.98e-88	PEG10	paternally expressed 10 [Source:HGNC Symbol;Acc:HGNC:14005]
ENSG00000157851	28.5468	7.20562	DPYSL5	1.9861	0.00017363	0.0022979	DPYSL5	dihydropyrimidinase like 5 [Source:HGNC Symbol;Acc:HGNC:20637]
ENSG00000137801	106.287	26.525	THBS1	2.0025	3.27e-13	1.57e-11	THBS1	thrombospondin 1 [Source:HGNC Symbol;Acc:HGNC:11785]
ENSG00000197457	88.4233	21.8257	STMN3	2.0184	2.46e-11	9.8e-10	STMN3	stathmin 3 [Source:HGNC Symbol;Acc:HGNC:15926]
ENSG00000163535	68.3148	16.8131	SGO2	2.0226	4.21e-09	1.29e-07	SGO2	shugoshin 2 [Source:HGNC Symbol;Acc:HGNC:30812]
ENSG00000175592	91.5652	22.3479	FOSL1	2.0347	8.6e-12	3.52e-10	FOSL1	FOS like 1, AP-1 transcription factor subunit [Source:HGNC Symbol;Acc:HGNC:13718]
ENSG00000155816	29.7138	7.20562	FMN2	2.0439	9.59e-05	0.001372	FMN2	formin 2 [Source:HGNC Symbol;Acc:HGNC:14074]
ENSG00000143476	79.7156	18.7973	DTL	2.0843	9.94e-11	3.7e-09	DTL	denticleless E3 ubiquitin protein ligase homolog [Source:HGNC Symbol;Acc:HGNC:30288]
ENSG00000145604	41.9225	9.81635	SKP2	2.0945	2.54e-06	5.03e-05	SKP2	S-phase kinase associated protein 2 [Source:HGNC Symbol;Acc:HGNC:10901]
ENSG00000186871	43.4486	9.50306	ERCC6L	2.1928	8.4e-07	1.81e-05	ERCC6L	ERCC excision repair 6 like, spindle assembly checkpoint helicase [Source:HGNC Symbol;Acc:HGNC:20794]
ENSG00000215012	34.2921	7.41448	RTL10	2.2095	1.1e-05	0.00019431	RTL10	retrotransposon Gag like 10 [Source:HGNC Symbol;Acc:HGNC:26112]
ENSG00000135111	198.661	42.816	TBX3	2.2141	3.16e-26	4.09e-24	TBX3	T-box 3 [Source:HGNC Symbol;Acc:HGNC:11602]
ENSG00000148798	142.016	30.4933	INA	2.2195	2.95e-19	2.45e-17	INA	internexin neuronal intermediate filament protein alpha [Source:HGNC Symbol;Acc:HGNC:6057]
ENSG00000139926	51.8869	11.0695	FRMD6	2.2288	5.46e-08	1.44e-06	FRMD6	FERM domain containing 6 [Source:HGNC Symbol;Acc:HGNC:19839]
ENSG00000117115	21.7243	4.49046	PADI2	2.2744	0.00037119	0.0044871	PADI2	peptidyl arginine deiminase 2 [Source:HGNC Symbol;Acc:HGNC:18341]
ENSG00000185697	50.1813	9.71192	MYBL1	2.3693	3.01e-08	8.25e-07	MYBL1	MYB proto-oncogene like 1 [Source:HGNC Symbol;Acc:HGNC:7547]
ENSG00000204682	140.041	26.2117	CASC10	2.4176	7.74e-21	7.36e-19	CASC10	cancer susceptibility 10 [Source:HGNC Symbol;Acc:HGNC:31448]
ENSG00000240891	32.5864	6.0569	PLCXD2	2.4276	5.98e-06	0.00011145	PLCXD2	phosphatidylinositol specific phospholipase C X domain containing 2 [Source:HGNC Symbol;Acc:HGNC:26462]
ENSG00000172927	240.314	44.5913	MYEOV	2.4301	8.89e-35	1.64e-32	MYEOV	myeloma overexpressed [Source:HGNC Symbol;Acc:HGNC:7563]
ENSG00000147536	97.2207	17.753	GINS4	2.4532	3.67e-15	2.14e-13	GINS4	GINS complex subunit 4 [Source:HGNC Symbol;Acc:HGNC:28226]
ENSG00000140511	122.626	21.7213	HAPLN3	2.4971	4.59e-19	3.7e-17	HAPLN3	hyaluronan and proteoglycan link protein 3 [Source:HGNC Symbol;Acc:HGNC:21446]
ENSG00000102003	20.8266	3.65502	SYP	2.5105	0.00022644	0.0029211	SYP	synaptophysin [Source:HGNC Symbol;Acc:HGNC:11506]
ENSG00000171848	136.001	23.601	RRM2	2.5267	3.17e-21	3.06e-19	RRM2	ribonucleotide reductase regulatory subunit M2 [Source:HGNC Symbol;Acc:HGNC:10452]
ENSG00000163659	120.92	20.8859	TIPARP	2.5335	4.26e-19	3.46e-17	TIPARP	TCDD inducible poly(ADP-ribose) polymerase [Source:HGNC Symbol;Acc:HGNC:23696]
ENSG00000239306	208.715	33.3129	RBM14	2.6474	3.03e-33	5.07e-31	RBM14	RNA binding motif protein 14 [Source:HGNC Symbol;Acc:HGNC:14219]
ENSG00000165891	35.6386	5.63918	E2F7	2.6599	6.48e-07	1.43e-05	E2F7	E2F transcription factor 7 [Source:HGNC Symbol;Acc:HGNC:23820]
ENSG00000238266	22.2629	3.44617	LINC00707	2.6916	7.57e-05	0.0011141	LINC00707	long intergenic non-protein coding RNA 707 [Source:HGNC Symbol;Acc:HGNC:44691]
ENSG00000164236	36.8954	5.63918	ANKRD33B	2.7099	3.18e-07	7.39e-06	ANKRD33B	ankyrin repeat domain 33B [Source:HGNC Symbol;Acc:HGNC:35240]
ENSG00000169213	197.673	27.7782	RAB3B	2.8311	1.06e-33	1.79e-31	RAB3B	RAB3B, member RAS oncogene family [Source:HGNC Symbol;Acc:HGNC:9778]
ENSG00000106829	111.404	13.9935	TLE4	2.993	1.05e-20	9.72e-19	TLE4	transducin like enhancer of split 4 [Source:HGNC Symbol;Acc:HGNC:11840]
ENSG00000128564	73.1624	7.8322	VGF	3.2236	5.35e-15	3.06e-13	VGF	VGF nerve growth factor inducible [Source:HGNC Symbol;Acc:HGNC:12684]
ENSG00000144583	77.6509	4.17717	2018-03-04	4.2164	9.02e-19	7e-17	2018-03-04	membrane associated ring-CH-type finger 4 [Source:HGNC Symbol;Acc:HGNC:29269]
ENSG00000140465	14.9916	0	CYP1A1	4.5805	7.44e-05	0.0010965	CYP1A1	cytochrome P450 family 1 subfamily A member 1 [Source:HGNC Symbol;Acc:HGNC:2595]
ENSG00000171246	236.633	4.49046	NPTX1	5.7196	2.22e-58	1e-55	NPTX1	neuronal pentraxin 1 [Source:HGNC Symbol;Acc:HGNC:7952]
