# Supplementary material for: STAT3 induces G9a to exacerbate HER3 expression for the survival of epidermal growth factor receptor-tyrosine kinase inhibitors in lung cancers
Source: BMC Cancer. 2019 Oct 16;19:959. doi: 10.1186/s12885-019-6217-9 (PMC6796430; doi:10.1186/s12885-019-6217-9)
Supplement: Supplementary file 7 — Additional file 7: Table S7. Differential miRNAs in the A549shILF3 cells analyzed by small RNAseq. (XLSX 22 kb) [file 12885_2019_6217_MOESM7_ESM.xlsx]

## Sheet: small RNAseq ILFvsLuc.DE
miRNA	A549shILF	A549shLuc	log2.Fold_change.	p.value	q.value
hsa-let-7f-5p	1733.47	11203.8	-2.6923	0	0
hsa-miR-127-3p	2196.54	490.843	2.1619	0	0
hsa-miR-148a-3p	1059.1	10332.5	-3.2863	0	0
hsa-miR-151a-3p	22942.1	59150.1	-1.3664	0	0
hsa-miR-181a-5p	2062.28	314.446	2.7134	0	0
hsa-miR-192-5p	2563	10994.4	-2.1009	0	0
hsa-miR-193b-3p	1918	415.918	2.2052	0	0
hsa-miR-21-3p	6914.52	1452.47	2.2511	0	0
hsa-miR-22-3p	2377.59	721.515	1.7204	0	0
hsa-miR-27b-3p	6876.87	40987.1	-2.5753	0	0
hsa-miR-320a	7378.24	1427.1	2.3702	0	0
hsa-miR-378a-3p	8890.84	2030.63	2.1304	0	0
hsa-miR-378c	1553.07	195.275	2.9915	0	0
hsa-miR-425-5p	12808.7	4785.13	1.4205	0	0
hsa-miR-452-5p	4282.32	525.65	3.0262	0	0
hsa-miR-26a-5p	743.569	3622.33	-2.2844	2.57e-301	3.04e-300
hsa-let-7g-5p	1026.24	4241.19	-2.0471	1.35e-291	1.53e-290
hsa-miR-29b-3p	2295.77	757.503	1.5997	1.47e-288	1.59e-287
hsa-miR-769-5p	1682.77	485.533	1.7932	1.22e-237	1.18e-236
hsa-miR-27a-3p	428.689	2385.19	-2.4761	2.31e-226	2.14e-225
hsa-miR-365a-5p	1535.23	433.617	1.824	1.27e-220	1.14e-219
hsa-miR-126-3p	119.032	1427.69	-3.5843	4.61e-219	3.99e-218
hsa-let-7a-5p	2362.58	6377.42	-1.4326	6.29e-210	5.28e-209
hsa-miR-138-5p	1067.59	260.76	2.0336	6.78e-171	5.51e-170
hsa-miR-374a-3p	49.3972	851.895	-4.1082	7.83e-149	5.99e-148
hsa-miR-582-3p	3237.15	7332.55	-1.1796	2.75e-148	2.05e-147
hsa-miR-224-5p	472.429	1977.53	-2.0655	3.95e-139	2.86e-138
hsa-miR-3158-3p	781.868	179.936	2.1194	1.41e-130	9.9e-130
hsa-miR-134-5p	520.52	50.7362	3.3589	4.31e-125	2.95e-124
hsa-miR-26b-5p	185.185	1168.11	-2.6571	3.4e-124	2.27e-123
hsa-miR-378d	655.22	122.711	2.4167	3.32e-123	2.16e-122
hsa-miR-3158-5p	736.823	177.577	2.0529	1.34e-119	8.52e-119
hsa-miR-92a-3p	365.8	1593.47	-2.123	4.96e-118	3.07e-117
hsa-miR-125b-5p	1081.3	419.458	1.3662	1.57e-116	9.48e-116
hsa-miR-181b-5p	699.612	187.606	1.8989	1.33e-105	7.84e-105
hsa-miR-24-2-5p	777.081	244.831	1.6663	4.77e-103	2.76e-102
hsa-miR-185-5p	544.892	103.832	2.3917	6.99e-102	3.95e-101
hsa-miR-671-5p	349.262	12.3891	4.8172	1.41e-97	7.81e-97
hsa-miR-629-5p	609.087	169.317	1.8469	9.1e-90	4.93e-89
hsa-miR-99a-5p	360.795	1395.83	-1.9519	3.72e-89	1.98e-88
hsa-miR-576-3p	485.05	98.5225	2.2996	6.96e-88	3.62e-87
hsa-let-7e-5p	355.137	1366.93	-1.9445	9.73e-87	4.96e-86
hsa-miR-30c-2-3p	689.602	250.731	1.4596	3.12e-80	1.53e-79
hsa-miR-1307-3p	732.036	284.948	1.3612	3.35e-79	1.61e-78
hsa-miR-320b	437.176	96.1627	2.1847	6.86e-76	3.25e-75
hsa-miR-7974	389.52	71.9745	2.4361	1.64e-74	7.6e-74
hsa-miR-548o-3p	36.5583	447.186	-3.6126	1.72e-70	7.83e-70
hsa-miR-106b-5p	359.49	67.2549	2.4182	1.74e-68	7.78e-68
hsa-miR-3074-5p	1770.46	3790.46	-1.0982	1.12e-63	4.94e-63
hsa-miR-24-3p	1785.92	3808.16	-1.0924	5.12e-63	2.22e-62
hsa-miR-127-5p	325.76	62.5353	2.3811	1.99e-61	8.47e-61
hsa-miR-409-3p	346.433	75.5143	2.1978	7.69e-61	3.23e-60
hsa-miR-532-5p	231.1	910.301	-1.9778	3.32e-60	1.37e-59
hsa-miR-27b-5p	585.15	256.631	1.1891	1.88e-55	7.4e-55
hsa-miR-186-5p	501.588	202.945	1.3054	1.48e-52	5.59e-52
hsa-miR-374c-3p	19.3672	295.568	-3.9318	5.25e-51	1.92e-50
hsa-miR-374b-5p	19.8024	295.568	-3.8997	1.19e-50	4.31e-50
hsa-miR-148b-3p	164.73	668.419	-2.0207	2.05e-46	7.22e-46
hsa-miR-183-5p	1129.17	2476.63	-1.1331	5.79e-46	2.01e-45
hsa-miR-210-3p	256.778	55.4558	2.2111	8.44e-46	2.89e-45
hsa-miR-193b-5p	225.66	41.2969	2.45	3.94e-44	1.3e-43
hsa-miR-181d-5p	296.383	89.6732	1.7247	8.64e-42	2.81e-41
hsa-miR-130a-3p	197.371	30.6777	2.6857	9.84e-42	3.16e-41
hsa-miR-103a-3p	1265.39	2618.81	-1.0493	3.92e-39	1.23e-38
hsa-miR-342-3p	241.328	61.3553	1.9757	5.19e-39	1.61e-38
hsa-miR-103b	1210.78	2521.47	-1.0583	1.13e-38	3.44e-38
hsa-miR-30e-3p	100.97	455.445	-2.1733	2.09e-36	6.33e-36
hsa-miR-345-5p	271.576	109.142	1.3152	1.86e-29	5.49e-29
hsa-miR-542-3p	234.147	83.1837	1.493	4.99e-29	1.46e-28
hsa-miR-1180-3p	333.594	165.187	1.014	1.35e-27	3.91e-27
hsa-miR-149-5p	294.207	133.92	1.1355	1.93e-27	5.51e-27
hsa-miR-194-5p	277.451	760.452	-1.4546	1.97e-27	5.57e-27
hsa-miR-331-5p	13.0565	151.029	-3.532	2.08e-24	5.75e-24
hsa-miR-181a-2-3p	144.492	35.9873	2.0054	2.39e-24	6.54e-24
hsa-miR-320c	125.995	25.958	2.2791	6.28e-24	1.7e-23
hsa-miR-136-5p	127.301	27.7279	2.1988	1.93e-23	5.17e-23
hsa-miR-19b-3p	159.725	50.1462	1.6714	1.3e-22	3.34e-22
hsa-miR-16-5p	105.975	376.981	-1.8308	1.4e-22	3.57e-22
hsa-miR-374a-5p	20.02	160.468	-3.0028	1.24e-21	3.12e-21
hsa-miR-4473	21.108	159.878	-2.9211	7.49e-21	1.85e-20
hsa-miR-889-3p	5.005	96.7527	-4.2729	6.12e-19	1.47e-18
hsa-miR-335-3p	9.79239	111.502	-3.5093	2.54e-18	6.06e-18
hsa-miR-2682-5p	93.3542	317.396	-1.7655	5.07e-18	1.2e-17
hsa-miR-4326	133.612	46.6065	1.5194	1.55e-17	3.62e-17
hsa-miR-200b-3p	32.4237	169.907	-2.3896	8.02e-17	1.86e-16
hsa-miR-491-5p	62.8889	5.89955	3.4141	9.64e-17	2.22e-16
hsa-miR-25-5p	60.2776	5.3096	3.5049	2.46e-16	5.62e-16
hsa-miR-30c-5p	513.121	1049.53	-1.0324	6.58e-16	1.49e-15
hsa-miR-29a-5p	73.1165	14.7489	2.3096	1.08e-14	2.39e-14
hsa-miR-432-5p	71.1581	15.3388	2.2138	7.32e-14	1.61e-13
hsa-miR-1260b	102.276	38.3471	1.4153	6.62e-13	1.42e-12
hsa-miR-20a-5p	74.2046	239.522	-1.6906	6.59e-13	1.42e-12
hsa-miR-331-3p	117.291	50.1462	1.2259	9.61e-13	2.05e-12
hsa-miR-193a-5p	68.7644	16.5187	2.0576	1.16e-12	2.46e-12
hsa-miR-1307-5p	52.4437	8.25937	2.6667	3.49e-12	7.31e-12
hsa-miR-221-5p	206.511	476.684	-1.2068	1.02e-11	2.12e-11
hsa-miR-1247-3p	36.9935	1.76987	4.3856	1.51e-11	3.11e-11
hsa-miR-651-5p	4.13457	52.506	-3.6667	8.93e-10	1.8e-09
hsa-miR-32-5p	20.02	97.9326	-2.2903	1e-09	1.99e-09
hsa-miR-200a-5p	49.1796	162.238	-1.722	1.64e-09	3.19e-09
hsa-miR-95-3p	0	37.7571	-5.8539	2.54e-09	4.9e-09
hsa-miR-129-5p	34.5998	4.12969	3.0667	2.62e-09	5.02e-09
hsa-miR-376b-3p	27.6363	0	5.5498	3.23e-09	6.14e-09
hsa-miR-1269b	77.9039	33.0375	1.2376	5.07e-09	9.49e-09
hsa-miR-455-5p	222.614	469.604	-1.0769	8.63e-09	1.58e-08
hsa-miR-128-1-5p	37.4287	6.48951	2.528	8.92e-09	1.62e-08
hsa-miR-152-5p	44.6098	10.6192	2.0707	9.26e-09	1.67e-08
hsa-miR-486-5p	59.6248	20.6484	1.5299	1.1e-08	1.96e-08
hsa-miR-362-5p	46.1331	11.7991	1.9671	1.2e-08	2.12e-08
hsa-miR-323a-3p	10.01	65.485	-2.7097	1.26e-08	2.22e-08
hsa-miR-585-3p	43.957	10.6192	2.0494	1.4e-08	2.44e-08
hsa-miR-486-3p	58.972	20.6484	1.514	1.58e-08	2.75e-08
hsa-miR-451a	57.8839	20.0585	1.529	1.82e-08	3.14e-08
hsa-miR-3934-5p	31.3357	4.12969	2.9237	2.54e-08	4.35e-08
hsa-miR-92b-5p	37.8639	8.25937	2.1967	5.37e-08	9.13e-08
hsa-miR-493-3p	149.497	334.505	-1.1619	6.2e-08	1.05e-07
hsa-miR-139-5p	15.4502	76.1042	-2.3003	6.49e-08	1.09e-07
hsa-miR-18a-3p	29.3772	4.12969	2.8306	9.88e-08	1.65e-07
hsa-miR-320d	39.3872	10.0292	1.9735	1.33e-07	2.18e-07
hsa-miR-130b-3p	19.5848	0	5.053	6.37e-07	1.04e-06
hsa-miR-181c-5p	28.0715	5.3096	2.4024	1.1e-06	1.76e-06
hsa-miR-194-3p	3.48174	35.3973	-3.3458	1.65e-06	2.64e-06
hsa-miR-16-2-3p	6.74587	44.2466	-2.7135	2.83e-06	4.49e-06
hsa-miR-32-3p	0	24.7781	-4.8312	2.91e-06	4.59e-06
hsa-miR-193a-3p	18.2791	1.17991	3.9534	3.28e-06	5.13e-06
hsa-miR-376c-3p	28.5067	7.07946	2.0096	5.99e-06	9.32e-06
hsa-miR-206	16.103	0	5.0093	6.38e-06	9.88e-06
hsa-miR-582-5p	25.8954	87.3134	-1.7535	6.6e-06	1.02e-05
hsa-miR-450a-5p	5.87544	39.527	-2.7501	7.89e-06	1.21e-05
hsa-miR-340-5p	54.8374	142.179	-1.3745	1.16e-05	1.74e-05
hsa-miR-148a-5p	16.103	1.17991	3.7706	1.56e-05	2.34e-05
hsa-miR-23b-5p	26.7659	7.07946	1.9187	1.79e-05	2.64e-05
hsa-miR-664a-5p	18.2791	2.35982	2.9534	1.95e-05	2.87e-05
hsa-miR-3662	16.9735	1.76987	3.2616	2.08e-05	3.04e-05
hsa-miR-3615	127.084	262.53	-1.0467	3.71e-05	5.4e-05
hsa-miR-33b-3p	15.6678	1.76987	3.1461	5.31e-05	7.64e-05
hsa-miR-7-1-3p	4.56978	30.6777	-2.747	8.38e-05	0.00011973
hsa-miR-7706	72.8989	165.777	-1.1853	9.01e-05	0.00012812
hsa-miR-19b-1-5p	16.9735	2.94978	2.5246	0.00010884	0.00015303
hsa-miR-7641	0	15.9288	-4.9936	0.0001567	0.00021913
hsa-miR-17-3p	16.3207	2.94978	2.468	0.00017075	0.00023751
hsa-miR-93-3p	12.6213	1.17991	3.4191	0.00019613	0.00026993
hsa-miR-16-1-3p	16.9735	3.53973	2.2616	0.00022464	0.00030753
hsa-miR-485-3p	17.4087	4.12969	2.0757	0.00032796	0.00044429
hsa-miR-877-5p	29.1596	12.3891	1.2349	0.0003546	0.00047544
hsa-miR-769-3p	32.8589	15.3388	1.0991	0.00036423	0.00048584
hsa-miR-377-3p	11.7509	1.17991	3.316	0.0003709	0.00049221
hsa-miR-454-3p	10.4452	41.8868	-2.0037	0.00038156	0.00050379
hsa-miR-34c-3p	19.8024	5.89955	1.747	0.00042645	0.00056021
hsa-miR-92a-1-5p	18.7144	5.3096	1.8175	0.0004775	0.00062412
hsa-miR-210-5p	21.3257	7.07946	1.5909	0.00048899	0.00063595
hsa-miR-487a-3p	10.8804	1.17991	3.205	0.00070263	0.00090924
hsa-miR-299-3p	9.57479	0	4.0206	0.00072635	0.00093529
hsa-miR-493-5p	21.7609	63.7152	-1.5499	0.0007372	0.00094458
hsa-miR-429	0	13.569	-4.3775	0.00078433	0.00099516
hsa-miR-656-3p	0	12.979	-4.6981	0.00078185	0.00099516
hsa-miR-625-3p	8.05152	34.2174	-2.0874	0.00085998	0.0010859
hsa-miR-548u	26.5483	71.9745	-1.4389	0.00098285	0.0012291
hsa-miR-365b-5p	26.7659	12.3891	1.1113	0.0012113	0.0015075
hsa-miR-34b-3p	24.3722	10.6192	1.1986	0.0013081	0.0016125
hsa-miR-378g	8.70435	0	3.8831	0.0013846	0.0016987
hsa-miR-539-5p	11.9685	2.35982	2.3425	0.0016496	0.0019865
hsa-let-7a-3p	8.05152	32.4475	-2.0108	0.0017071	0.0020462
hsa-miR-378a-5p	19.1496	7.07946	1.4356	0.0017301	0.0020643
novel_9	0	11.2091	-4.4866	0.0020848	0.0024761
hsa-miR-365a-3p	62.8889	132.74	-1.0777	0.0021906	0.00259
hsa-miR-324-5p	18.7144	7.07946	1.4024	0.0022162	0.0026083
hsa-miR-329-3p	11.5333	2.35982	2.2891	0.0022295	0.0026122
hsa-miR-2277-3p	7.83392	0	3.9697	0.002299	0.0026577
hsa-miR-874-3p	7.83392	0	3.9697	0.002299	0.0026577
hsa-miR-664a-3p	2.17609	16.5187	-2.9243	0.0025878	0.0029652
hsa-miR-411-5p	13.927	43.6567	-1.6483	0.002812	0.003208
hsa-miR-942-3p	8.92196	1.17991	2.9187	0.0029742	0.0033782
hsa-miR-542-5p	7.3987	0	3.8873	0.003188	0.0036053
hsa-miR-145-5p	11.7509	2.94978	1.9941	0.0037832	0.0042599
novel_10	0	10.0292	-4.3261	0.0040386	0.0045278
hsa-miR-485-5p	16.7559	6.48951	1.3685	0.0042611	0.0047365
hsa-let-7g-3p	10.4452	2.35982	2.1461	0.004713	0.0051725
hsa-miR-2110	9.35718	1.76987	2.4024	0.0049018	0.0053571
hsa-miR-376a-3p	14.7974	5.3096	1.4787	0.0051612	0.005617
hsa-miR-190a-5p	12.1861	3.53973	1.7835	0.0052307	0.0056689
hsa-let-7a-2-3p	13.927	4.71964	1.5611	0.0052626	0.0056798
hsa-miR-1252-5p	8.05152	1.17991	2.7706	0.0056576	0.0060559
hsa-miR-3176	8.05152	1.17991	2.7706	0.0056576	0.0060559
hsa-miR-1254	11.098	2.94978	1.9116	0.0058263	0.0062109
hsa-miR-887-3p	6.52826	0	3.7067	0.0061713	0.0065518
hsa-miR-590-3p	2.17609	14.7489	-2.7608	0.0062014	0.006557
hsa-miR-424-5p	20.4552	10.0292	1.0283	0.0066243	0.0069758
hsa-miR-132-3p	29.3772	69.6147	-1.2447	0.0067628	0.0070362
hsa-miR-654-3p	29.3772	69.6147	-1.2447	0.0067628	0.0070362
hsa-miR-219a-2-3p	6.31065	0	3.6578	0.0072899	0.0075244
hsa-miR-219b-5p	6.31065	0	3.6578	0.0072899	0.0075244
hsa-miR-1249-5p	8.70435	1.76987	2.2981	0.0077877	0.0079437
hsa-miR-2277-5p	13.2741	4.71964	1.4919	0.0077867	0.0079437
hsa-miR-30c-1-3p	10.6628	2.94978	1.8539	0.0077539	0.0079437
hsa-miR-340-3p	3.26413	17.1087	-2.39	0.0081975	0.008329
hsa-miR-215-5p	7.83392	27.7279	-1.8235	0.0082604	0.0083603
hsa-miR-199a-5p	6.31065	0	3.4191	0.0084579	0.0085269
hsa-miR-23a-5p	9.35718	2.35982	1.9874	0.0098849	0.0099271
