# Supplementary material for: STAT3 induces G9a to exacerbate HER3 expression for the survival of epidermal growth factor receptor-tyrosine kinase inhibitors in lung cancers
Source: BMC Cancer. 2019 Oct 16;19:959. doi: 10.1186/s12885-019-6217-9 (PMC6796430; doi:10.1186/s12885-019-6217-9)
Supplement: Supplementary file 8 — Additional file 8: Table S8. Differential miRNAs in the A549shG9a cells analyzed by small RNAseq. (XLSX 16 kb) [file 12885_2019_6217_MOESM8_ESM.xlsx]

## Sheet: small RNAseq G9avsLuc.DE
miRNA	A549shG9a	A549shLuc	log2.Fold_change.	p.value	q.value
hsa-miR-4485-3p	16.2292	0	5.0205	5.57e-06	9.5e-06
hsa-miR-199a-5p	10.8194	0	4.1913	0.00028203	0.00037683
hsa-miR-7704	9.0162	0	3.9283	0.0010665	0.0013433
hsa-miR-1272	7.21296	0	3.8506	0.0035708	0.0039448
hsa-miR-4680-5p	7.21296	0	3.8506	0.0035708	0.0039448
hsa-miR-195-3p	14.4259	1.18446	3.6064	5.03e-05	7.6e-05
hsa-miR-7641	128.03	15.9902	3.0012	3.89e-30	1.75e-29
hsa-miR-3687	117.211	14.8058	2.9849	1.25e-27	5.14e-27
hsa-miR-3176	9.0162	1.18446	2.9283	0.0026964	0.0030296
hsa-miR-548j-3p	9.0162	1.18446	2.9283	0.0026964	0.0030296
hsa-miR-3529-3p	48132.1	6521.06	2.8838	0	0
hsa-miR-7-5p	48501.7	6576.13	2.8827	0	0
hsa-miR-129-5p	28.8518	4.14562	2.799	1.31e-07	2.81e-07
hsa-let-7f-1-3p	10.8194	1.77669	2.6064	0.0016721	0.0019682
hsa-miR-3662	10.8194	1.77669	2.6064	0.0016721	0.0019682
hsa-miR-145-5p	16.2292	2.96116	2.4544	0.00017344	0.00024498
hsa-miR-218-5p	1035.06	189.514	2.4493	2.62e-197	5.76e-196
hsa-miR-548aq-3p	27.0486	5.92231	2.1913	3.98e-06	6.97e-06
hsa-miR-548g-5p	27.0486	5.92231	2.1913	3.98e-06	6.97e-06
hsa-miR-576-5p	43.2778	10.0679	2.1039	1.03e-08	2.48e-08
hsa-miR-424-3p	86.5555	21.3203	2.0214	1.89e-15	5.93e-15
hsa-miR-324-5p	28.8518	7.10677	2.0214	4.46e-06	7.73e-06
hsa-miR-301a-5p	14.4259	3.55339	2.0214	0.0011751	0.0014524
hsa-miR-576-3p	396.713	98.9026	2.004	1.98e-64	1.56e-63
hsa-miR-203a-3p	90.162	22.5048	2.0023	6.7e-16	2.14e-15
hsa-miR-203b-5p	90.162	22.5048	2.0023	6.7e-16	2.14e-15
hsa-miR-18a-3p	16.2292	4.14562	1.9689	0.00067622	0.00087976
hsa-miR-128-1-5p	25.2454	6.51454	1.9543	2.4e-05	3.82e-05
hsa-miR-548e-3p	21.6389	5.92231	1.8694	0.00012915	0.00018642
hsa-miR-26a-2-3p	10.8194	2.96116	1.8694	0.0067925	0.0069959
hsa-miR-363-3p	10.8194	2.96116	1.8694	0.0067925	0.0069959
hsa-miR-548ar-3p	10.8194	2.96116	1.8694	0.0067925	0.0069959
hsa-miR-7974	257.863	72.2522	1.8355	3.37e-39	1.76e-38
hsa-miR-320d	34.2616	10.0679	1.7668	2.79e-06	4.99e-06
hsa-miR-342-3p	198.356	61.592	1.6873	3.12e-28	1.37e-27
hsa-miR-3158-3p	568.02	180.63	1.6529	4.7e-76	4.65e-75
hsa-miR-3158-5p	559.004	178.262	1.6489	1.07e-74	9.62e-74
hsa-miR-548ah-3p	34.2616	11.2524	1.6064	7.93e-06	1.33e-05
hsa-miR-3155b	14.4259	4.73785	1.6064	0.003749	0.0041187
hsa-miR-548f-3p	70.3263	24.2815	1.5342	4.06e-10	1.07e-09
hsa-miR-143-3p	138.849	47.9707	1.5333	1.61e-18	5.67e-18
hsa-miR-452-5p	1503.9	527.678	1.511	4.1e-181	7.37e-180
hsa-miR-130a-3p	86.5555	30.796	1.4909	8.22e-12	2.36e-11
hsa-miR-585-3p	28.8518	10.6602	1.4364	0.00010844	0.00015885
hsa-miR-548p	34.2616	13.0291	1.3949	3.26e-05	5e-05
hsa-miR-625-5p	54.0972	20.7281	1.384	2e-07	4.17e-07
hsa-miR-185-5p	266.879	104.233	1.3564	3.01e-30	1.39e-29
hsa-miR-330-5p	165.898	65.1454	1.3486	2.63e-19	9.63e-19
hsa-miR-19a-3p	21.6389	8.88347	1.2844	0.0015629	0.0018619
hsa-miR-4677-3p	21.6389	8.88347	1.2844	0.0015629	0.0018619
hsa-miR-34c-3p	14.4259	5.92231	1.2844	0.0098128	0.0097216
hsa-miR-4664-3p	120.817	49.7474	1.2801	8.63e-14	2.58e-13
hsa-miR-424-5p	23.4421	10.0679	1.2193	0.0013579	0.0016679
hsa-miR-615-3p	39.6713	17.7669	1.1589	4.96e-05	7.54e-05
hsa-miR-625-3p	75.7361	34.3494	1.1407	2.69e-08	6.12e-08
hsa-miR-941	874.571	400.348	1.1273	1.04e-78	1.14e-77
hsa-let-7d-3p	45.081	21.3203	1.0803	3.06e-05	4.72e-05
hsa-miR-486-3p	43.2778	20.7281	1.062	5.15e-05	7.72e-05
hsa-miR-186-5p	418.352	203.727	1.0381	1.59e-35	7.68e-35
hsa-miR-19b-3p	102.785	50.3396	1.0299	8.27e-10	2.12e-09
hsa-miR-200c-3p	39.6713	19.5436	1.0214	0.00014594	0.00020913
hsa-miR-486-5p	41.4745	20.7281	1.0006	0.00012212	0.00017757
hsa-miR-31-3p	201.963	418.707	-1.0519	2.53e-07	5.04e-07
hsa-miR-146b-5p	84.7523	176.485	-1.0582	0.00072997	0.00094347
hsa-miR-769-5p	232.618	487.406	-1.0672	1.3e-08	3.05e-08
hsa-miR-34a-5p	243.437	530.047	-1.1226	1.64e-10	4.39e-10
hsa-miR-26a-5p	1664.39	3636.3	-1.1275	8.3e-64	6.08e-63
hsa-miR-27a-3p	1029.65	2394.39	-1.2175	2.36e-52	1.51e-51
hsa-miR-378d	52.2939	123.184	-1.2361	0.00042813	0.00056442
hsa-miR-582-5p	36.0648	87.6502	-1.2812	0.001843	0.0021438
hsa-miR-423-3p	649.166	1658.25	-1.353	8.21e-48	5.07e-47
hsa-miR-3184-5p	636.544	1630.41	-1.3569	2.3e-47	1.38e-46
hsa-miR-30a-3p	557.201	1479.99	-1.4093	3.53e-47	2.05e-46
hsa-miR-16-5p	140.653	378.436	-1.4279	1.28e-13	3.77e-13
hsa-miR-31-5p	506.71	1370.42	-1.4354	1.05e-45	5.94e-45
hsa-miR-26b-5p	425.565	1172.62	-1.4623	4.81e-41	2.57e-40
hsa-miR-147b	86.5555	239.261	-1.4669	1.19e-09	2.99e-09
hsa-miR-532-5p	306.551	913.812	-1.5758	4.51e-38	2.29e-37
hsa-miR-889-3p	32.4583	97.1259	-1.5813	2.43e-05	3.85e-05
hsa-miR-95-3p	12.6227	37.9028	-1.5863	0.0081452	0.0082179
hsa-miR-125b-1-3p	70.3263	214.98	-1.6121	1.41e-10	3.82e-10
hsa-miR-15b-5p	16.2292	49.7474	-1.616	0.0019751	0.0022576
hsa-miR-210-3p	18.0324	55.6697	-1.6263	0.00098203	0.0012449
hsa-miR-374a-5p	50.4907	161.087	-1.6737	7.36e-09	1.8e-08
hsa-let-7e-5p	429.171	1372.2	-1.6769	3.43e-64	2.61e-63
hsa-miR-92a-3p	499.497	1599.62	-1.6792	9.59e-75	9.03e-74
hsa-miR-30b-5p	128.03	435.882	-1.7675	7.54e-24	2.92e-23
hsa-miR-374b-5p	84.7523	296.708	-1.8077	1.9e-17	6.27e-17
hsa-miR-374c-3p	84.7523	296.708	-1.8077	1.9e-17	6.27e-17
hsa-miR-501-3p	12.6227	45.0096	-1.8342	0.00078268	0.001005
hsa-miR-651-5p	14.4259	52.7086	-1.8694	0.00021245	0.00029175
hsa-miR-30e-3p	124.424	457.202	-1.8776	6.2e-28	2.66e-27
hsa-miR-181a-3p	21.6389	81.1356	-1.9067	2.8e-06	4.99e-06
hsa-miR-502-3p	19.8356	79.9512	-2.011	1e-06	1.92e-06
hsa-miR-137	5.40972	21.9125	-2.0181	0.010192	0.0099779
hsa-miR-221-3p	676.215	2805.4	-2.0527	6.76e-192	1.34e-190
hsa-miR-374a-3p	198.356	855.182	-2.1081	1.19e-62	8.39e-62
hsa-miR-4521	18.0324	78.1745	-2.1161	4.04e-07	7.91e-07
hsa-miR-323a-3p	14.4259	65.7376	-2.1881	1.7e-06	3.15e-06
hsa-miR-500a-3p	25.2454	123.184	-2.2867	1.02e-11	2.88e-11
hsa-miR-27b-3p	6448.38	41145.2	-2.6737	0	0
hsa-miR-1260b	5.40972	38.495	-2.831	7.46e-06	1.26e-05
hsa-miR-656-3p	1.80324	13.0291	-2.8531	0.0087819	0.0088153
hsa-miR-146a-5p	275.896	3772.51	-3.7733	0	0
hsa-miR-1269b	1.80324	33.1649	-4.201	2.5e-07	5.04e-07
hsa-miR-410-3p	0	9.4757	-4.2442	0.005644	0.0059685
hsa-miR-532-3p	0	10.0679	-4.3317	0.0040451	0.0043473
novel_10	0	10.0679	-4.3317	0.0040451	0.0043473
novel_9	0	11.2524	-4.4922	0.0020874	0.0023723
hsa-miR-1268a	0	28.4271	-5.8292	2.47e-07	5.04e-07
